# Supplementary material for: Lobular architecture of human adipose tissue defines the niche and fate of progenitor cells
Source: PubMed Central journal article supplement (PMC6560121; doi:10.1038/s41467-019-09992-3), 2019-06-11
Supplement: 41467_2019_9992_MOESM1_ESM.pdf [file 41467_2019_9992_MOESM1_ESM.pdf]

## **Supplementary Information**

### **Lobular architecture of human adipose tissue defines the niche and fate of progenitor cells**

Estève D & Boulet N et al.

Correspondence: [jean.galitzky@inserm.fr](mailto:jean.galitzky@inserm.fr)

Supplementary Information includes 5 supplementary figures and 4 supplementary tables.

## Supplementary Figure 1

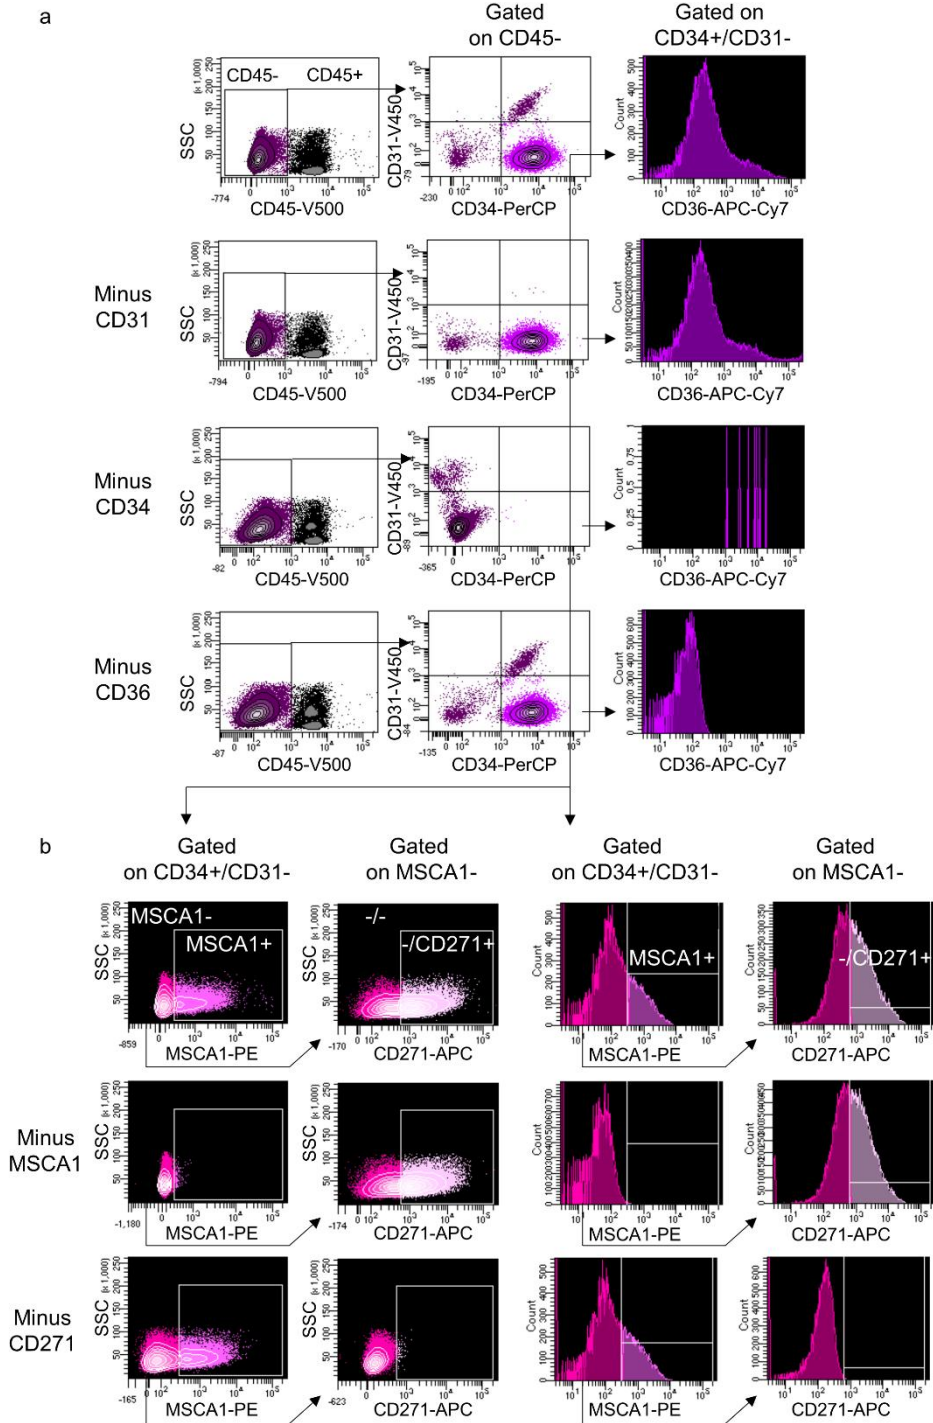

### Supplementary Figure 1: Fluorescence minus one controls

Freshly isolated SVF cells were analyzed by flow cytometry using anti-CD45, -CD31, -CD34, -CD36, -CD271 and -MSCA1 antibodies. a) Representative dot-plots of CD45 / CD34 / CD31 stainings and histograms of CD36 in the CD45-/CD31-/CD34+ progenitor population are shown with and without one indicated antibody. b) Representative dot-plots and histograms of MSCA1 staining gated in the CD45-/CD31-/CD34+ progenitor population and of CD271 staining gated in the MSCA1- population are shown with and without one indicated antibody. The experiment was performed on 4 distinct donors.

**Supplementary Figure 2**

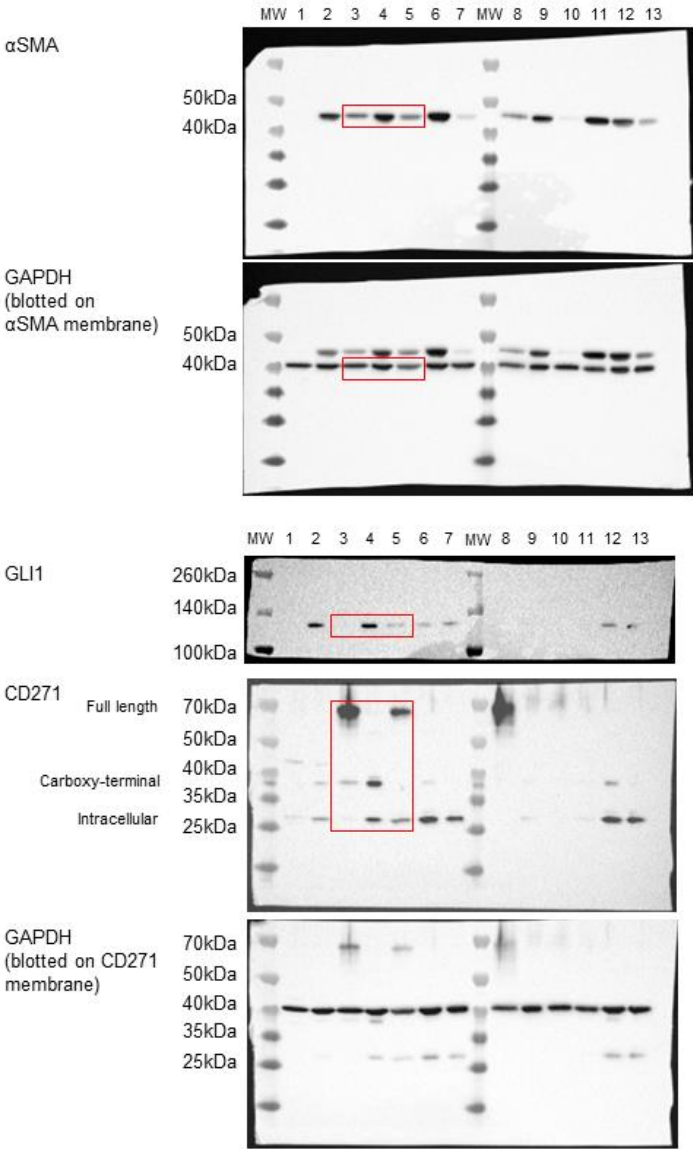

1: donor 1 Control; 2: donor 1 TGFβ; 3: donor 2 Control; 4: donor 2 TGFβ; 5: donor 2 TGFβ + γSI; 6: donor 3 TGFβ; 7: donor 3 TGFβ + γSI; 8: donor 4 Control; 9: donor 4 TGFβ; 10: donor 4 TGFβ + γSI; 11: donor 5 Control; 12: donor 5 TGFβ; 13: donor 5 TGFβ + γSI

**Supplementary Figure 2: Full-length western blot images**

### Supplementary Figure 3

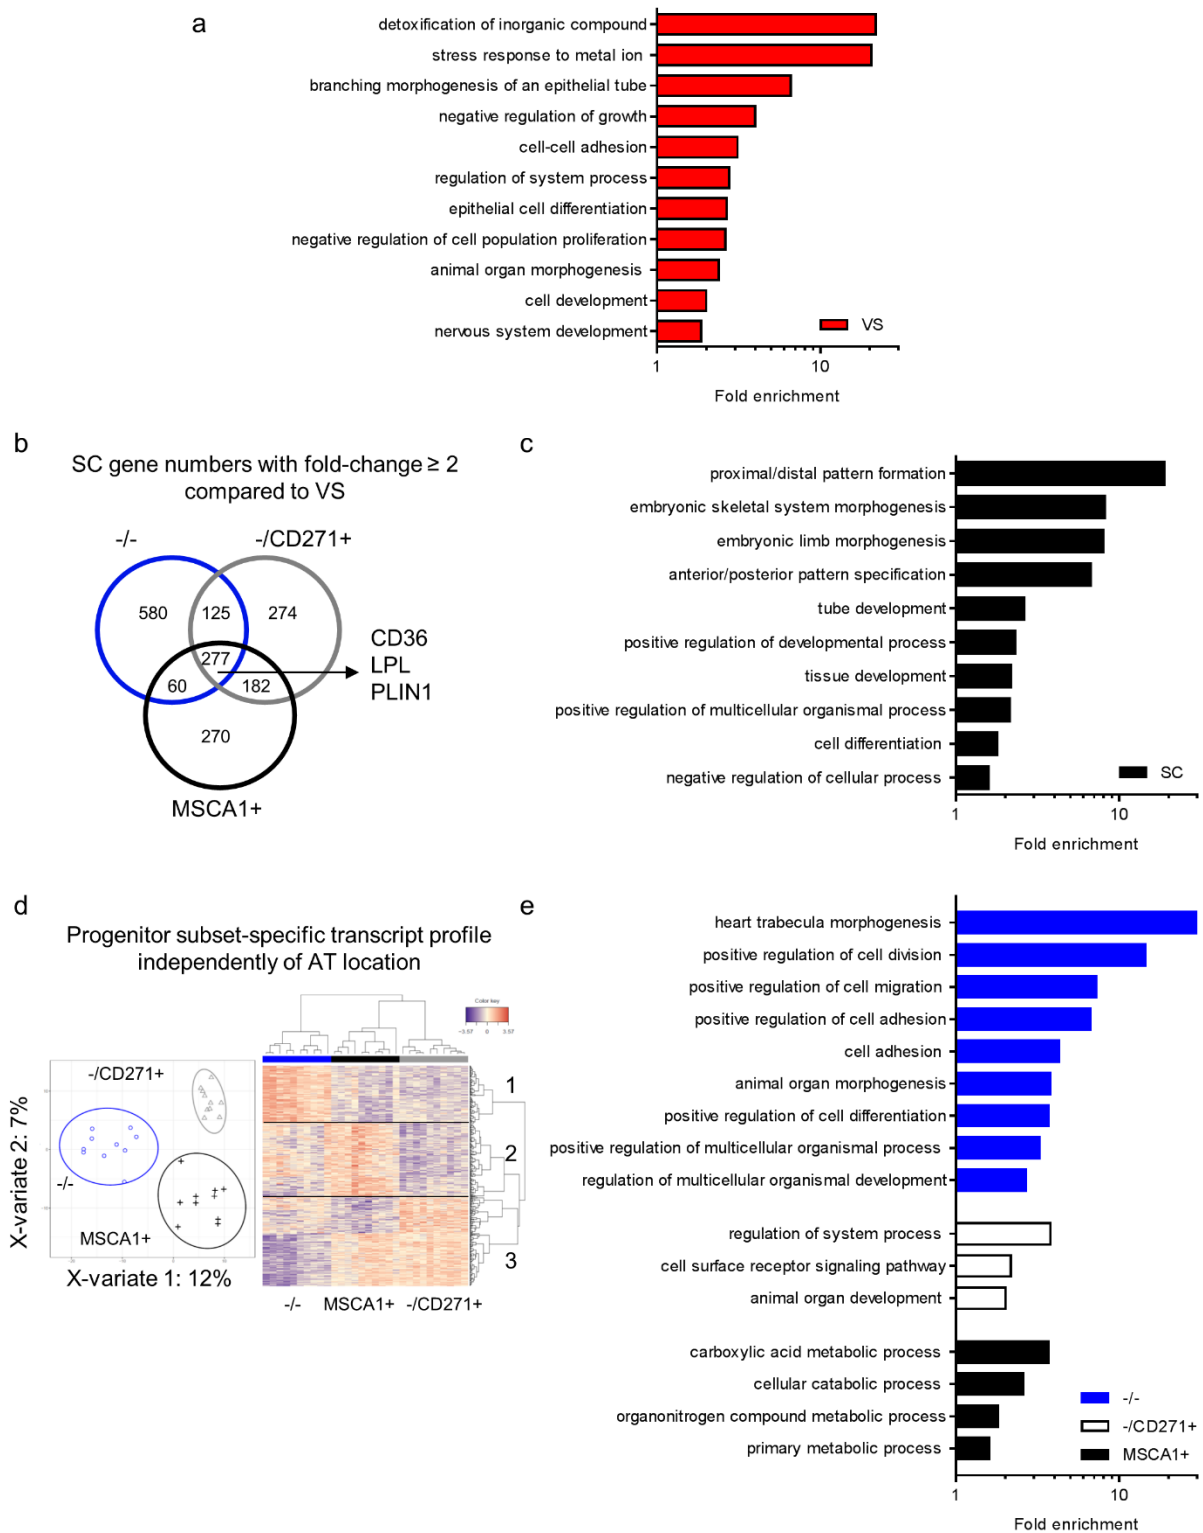

### Supplementary Figure 3:

a) GO pathway analysis of VSAT location-specific genes commonly expressed by all the progenitor subsets (349 genes from Fig. 6). b) Venn diagrams of differentially expressed genes (2 and more fold-change) in each SC progenitor subset compared to VS subsets, highlighting some genes of interest. c)

GO pathway analysis of SCAT location-specific genes commonly expressed by all the progenitor subsets (277 genes). VS and SC transcripts are listed in Supplementary Table 3. d) Sparse partial least square discriminant analysis plot of the two principal components. The 95% confidence ellipses are shown to strengthen the cell population clustering (left) and heatmap (right) of the top 300 most differentially expressed genes defining progenitor subset-specific profile independently on SC and VS AT location. Color code is setup according to gene expression (high expression in red, low in blue). e) GO pathway analysis of progenitor subset-specific genes independently on AT location, -/- obtained from gene cluster 1, -/CD271+ from gene cluster 3 and MSCA1+ from gene cluster 2 (clusters are indicated on the heatmap).

## Supplementary Figure 4

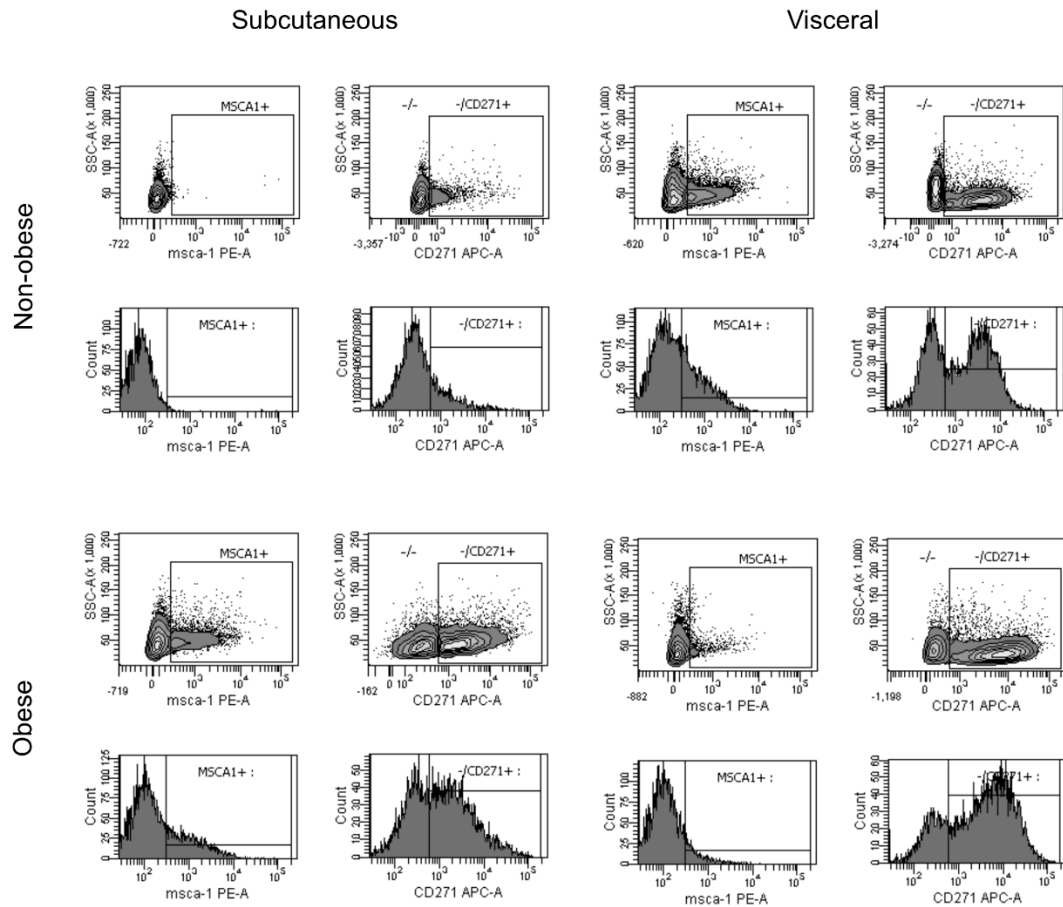

### Supplementary Figure 4: flow cytometry analyses of non-obese and obese SC and VSAT progenitor cells

MSCA1+, -/CD271+ and -/- progenitor cell subsets were analyzed by flow cytometry on SVF cells isolated from paired subcutaneous (left) and visceral (right) AT, from lean (up) and obese donor (down) corresponding to the data presented in Figure 8. Representative dot-plots and histograms of MSCA1 and CD271 stainings gated in the CD45-/CD31-/CD34+ progenitor population (same gating strategy shown in Supplementary Figure 2). The experiment was performed on 23 non-obese and 123 obese women.

Supplementary Figure 5

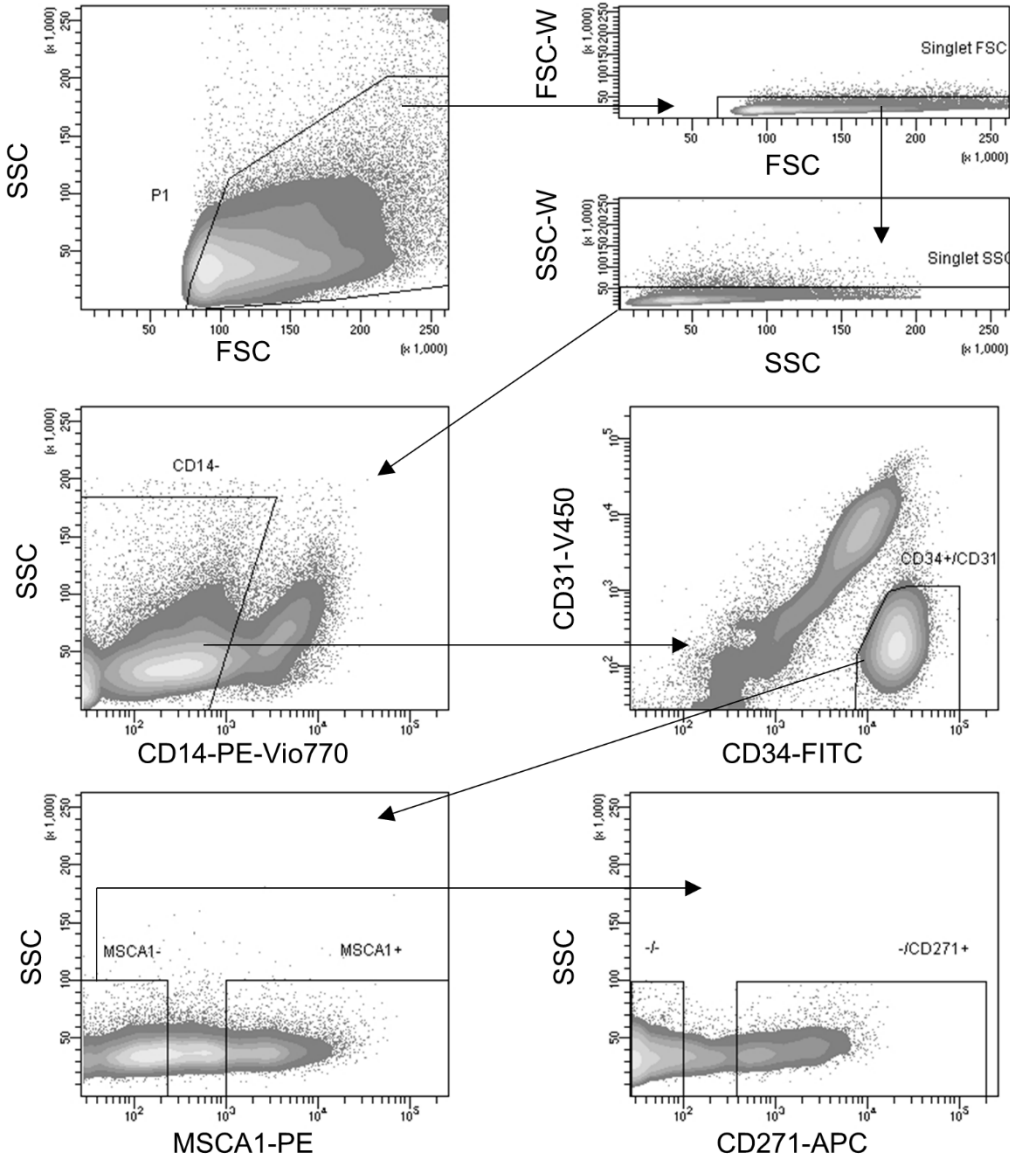

Supplementary Figure 5: Gating strategy for progenitor subset sorting

Gating strategy to sort the progenitor subsets from freshly isolated stromal vascular cells. Doublets were eliminated using FSC and FSC-W, then SSC and SSC-W. CD14 negative cells were gated into single cells. CD34+/CD31- progenitor cells were gated into CD14- cells. Then, MSCA1+ progenitor cells were gated into CD34+/CD31- progenitor cells and sorted. -/CD271+ and -/- progenitor cells were gated into MSCA1 negative cells and sorted.

**Supplementary Table1**

|                                                                | Non-obese women              | Obese women without<br>metabolic syndrome | Obese women with<br>metabolic syndrome |
|----------------------------------------------------------------|------------------------------|-------------------------------------------|----------------------------------------|
| Number of participants                                         | 23                           | 57                                        | 66                                     |
| Age (years)                                                    | 43,32 ± 8,67 (21,37 - 59,38) | 37,54 ± 8,53 (24,8 - 58,07)               | 44,62 ± 10,55 (18,91 - 64,64) ##       |
| BMI (kg/m <sup>2</sup> )                                       | 23,92 ± 2,66 (18,73 - 28)    | 43,67 ± 6,23 (26,1 - 63,4) ***            | 44,15 ± 6,32 (33,9 - 62,8) ***         |
| Waist (cm)                                                     | 82,23 ± 8,3 (70 - 98)        | 117,65 ± 13,92 (96 - 152) ***             | 122,63 ± 12,57 (96 - 152) ***          |
| Hip (cm)                                                       | 97,05 ± 9,21 (78 - 108)      | 132,35 ± 10,68 (101 - 160) ***            | 127,11 ± 12,71 (99 - 169) ***, #       |
| Waist/Hip ratio                                                | 0,85 ± 0,07 (0,72 - 0,9694)  | 0,89 ± 0,09 (0,6621 - 1,118) **           | 0,97 ± 0,1 (0,7619 - 1,31) ***         |
| Fasting Glucose (mmol/l)                                       | 4,93 ± 0,38 (4,24 - 5,66)    | 5,1 ± 0,42 (4,1 - 6)                      | 6,36 ± 1,55 (4,4 - 10,6) ***, ###      |
| HbA1c (%)                                                      | 5,33 ± 0,35 (4,5 - 5,9)      | 5,54 ± 0,41 (4,6 - 6,8)                   | 6,23 ± 0,95 (4,9 - 10,7) ***, ###      |
| Triglycerides (mmol/l)                                         | 0,95 ± 0,51 (0,41 - 2,48)    | 0,92 ± 0,35 (0,42 - 2,06)                 | 1,66 ± 0,8 (0,47 - 4,34) ***, ###      |
| Total Cholesterol (mmol/l)                                     | 5,13 ± 1,15 (3,36 - 8,66)    | 5,1 ± 0,97 (3,33 - 7,61)                  | 5,27 ± 0,83 (2,96 - 7,14)              |
| HDL Cholesterol (mmol/l)                                       | 1,57 ± 0,45 (0,93 - 2,79)    | 1,34 ± 0,29 (0,8 - 2)                     | 1,09 ± 0,22 (0,6 - 1,7) ***, ###       |
| LDL Cholesterol (mmol/l)                                       | 3,13 ± 0,84 (2,12 - 5,89)    | 3,34 ± 0,87 (2 - 5,6)                     | 3,43 ± 0,79 (1,2 - 5,3)                |
| CRP (mg/l)                                                     | 3,35 ± 3,75 (0,1 - 15)       | 10,74 ± 7,64 (2 - 44) ***                 | 10,30 ± 7,5 (2 - 43) ***               |
| Gamma GT (U/l)                                                 | 16,52 ± 5,09 (8 - 25)        | 35,54 ± 22,12 (10 - 124) **               | 44,91 ± 23 (19 - 157) ***, #           |
| SGOT / ASAT (U/l)                                              | 17,78 ± 4,8 (11 - 34)        | 22,23 ± 9,63 (10 - 68)                    | 24,06 ± 10,53 (11 - 65) **             |
| SGPT / ALAT (U/l)                                              | 16,61 ± 9,59 (7 - 55)        | 31,79 ± 17,44 (11 - 96) **                | 37,24 ± 18,73 (15 - 96) ***            |
| SBP (mmHg)                                                     | 118,65 ± 16,02 (94 - 149)    | 123,72 ± 9,97 (94 - 144)                  | 136,52 ± 12,63 (101 - 160) ***, ###    |
| DBP (mmHg)                                                     | 75,78 ± 7,68 (64 - 90)       | 65,82 ± 9,16 (41 - 87) ***                | 73,06 ± 9,54 (35 - 91) ###             |
| Number of participants with:<br>high blood pressure medication | 1                            | 4                                         | 23                                     |
| dyslipidemia medication                                        | 0                            | 0                                         | 11                                     |
| diabetes medication                                            | 0                            | 0                                         | 17                                     |
| impaired fasting glucose                                       | 0                            | 0                                         | 30                                     |
| low HDL                                                        | 7                            | 26                                        | 62                                     |
| high TG                                                        | 2                            | 2                                         | 25                                     |



**Supplementary Table1: Donor characteristics from SENADIP cohort.**

Data are presented as mean +/- standard deviation (SD), SD range is indicated in between parenthesis for each group of patient. One way ANOVA followed by Tukey's multiple comparison test, \*\* P<0.01, \*\*\* P<0.001 compared to non-obese group, # P<0.05, ## P<0.01, ### P<0.001 obese without metabolic syndrome group compared to obese with metabolic syndrome group.

**Supplementary Table 2: list of transcripts specific for -/-, -/CD271+ and MSCA1+ subsets isolated from subcutaneous AT**

Gene name followed by the fold change over indicated subset and raw P value

| <b>Up in -/- cells from SC</b> |                |             |              |             |
|--------------------------------|----------------|-------------|--------------|-------------|
| Gene name                      | FC vs -/CD271+ | raw P value | FC vs MSCA1+ | raw P value |
| AADA2L2                        | 20,1           | 0,0012      | 5,5          | 0,0327      |
| ABCA3                          | 3,6            | 4,06E-05    | 2,3          | 0,0015      |
| ABCB5                          | 5,8            | 8,84E-05    | 2,0          | 0,0374      |
| ADGRG2                         | 28,5           | 0,0003      | 5,7          | 0,0227      |
| ADGRG6                         | 8,8            | 2,36E-05    | 3,6          | 0,0019      |
| AHNAK2                         | 2,6            | 0,0012      | 2,3          | 0,0038      |
| AIF1L                          | 6,2            | 0,0056      | 3,3          | 0,047       |
| AMACR                          | 3,1            | 0,001       | 2,0          | 0,0196      |
| ANOS1                          | 4,1            | 0,0168      | 3,5          | 0,0295      |
| APCDD1L-AS1                    | 4,8            | 0,0208      | 6,8          | 0,007       |
| AQP1                           | 2,2            | 0,0285      | 3,7          | 0,0015      |
| ARL4C                          | 4,4            | 0,0008      | 2,8          | 0,0089      |
| BMP3                           | 9,0            | 0,0128      | 5,3          | 0,0466      |
| BMP7                           | 12,9           | 8,18E-05    | 4,5          | 0,0051      |
| BTC                            | 2,7            | 0,0112      | 3,0          | 0,0061      |
| C1QTNF3                        | 14,1           | 0,0012      | 4,9          | 0,0263      |
| C1QTNF3-AMACR                  | 23,2           | 0,0019      | 16,7         | 0,0041      |
| CADM3                          | 2,4            | 0,0391      | 2,6          | 0,0272      |
| CCR1                           | 3,2            | 0,0042      | 2,2          | 0,0334      |
| CD24                           | 8,5            | 0,0064      | 6,0          | 0,0172      |
| CD55                           | 2,5            | 0,0043      | 2,5          | 0,0042      |
| CDA                            | 3,2            | 0,0014      | 2,6          | 0,0062      |
| CDKN2A                         | 3,4            | 0,0158      | 3,6          | 0,0129      |
| CDKN2B                         | 2,3            | 0,0239      | 2,1          | 0,0394      |
| CDS1                           | 4,5            | 0,0034      | 5,8          | 0,0011      |
| CKMT2                          | 2,1            | 0,0121      | 2,2          | 0,0079      |
| CLEC3B                         | 2,7            | 0,0013      | 2,0          | 0,0124      |
| DKK1                           | 3,2            | 0,0247      | 3,0          | 0,0333      |
| DUOX2                          | 3,8            | 0,0025      | 4,4          | 0,0012      |
| EFHD1                          | 2,4            | 0,0282      | 2,3          | 0,0426      |
| ELL3                           | 2,6            | 0,009       | 2,7          | 0,0068      |
| ELMO1                          | 2,6            | 0,0077      | 2,0          | 0,0365      |
| EMILIN2                        | 2,8            | 0,0018      | 2,2          | 0,0089      |
| ERBB3                          | 4,7            | 0,0097      | 3,1          | 0,0462      |
| ERC2                           | 2,0            | 0,0099      | 2,3          | 0,0029      |
| F5                             | 4,1            | 0,0247      | 3,6          | 0,0366      |
| FAM133A                        | 5,2            | 0,0059      | 3,1          | 0,0423      |
| FAM19A5                        | 6,8            | 0,0224      | 7,5          | 0,0172      |
| FAM69C                         | 4,0            | 0,0098      | 4,6          | 0,0055      |
| FGF16                          | 3,2            | 0,0028      | 3,2          | 0,0033      |
| FHOD3                          | 3,5            | 0,0084      | 2,6          | 0,0349      |
| FNDC1                          | 7,9            | 8,05E-06    | 3,5          | 0,0008      |
| FNDC5                          | 3,4            | 0,0017      | 2,1          | 0,0278      |

|           |      |          |     |          |
|-----------|------|----------|-----|----------|
| GALNT15   | 2,2  | 0,0324   | 2,1 | 0,0453   |
| GATM      | 4,0  | 0,0038   | 2,9 | 0,018    |
| GDF15     | 3,2  | 0,0063   | 2,7 | 0,0149   |
| GGT1      | 2,5  | 0,0386   | 3,2 | 0,0126   |
| GLRB      | 5,2  | 0,0015   | 2,8 | 0,0246   |
| GPER1     | 2,4  | 0,0047   | 2,3 | 0,0071   |
| GUCY1A2   | 6,5  | 0,0038   | 3,8 | 0,0268   |
| HIST3H2BB | 2,1  | 0,0017   | 2,3 | 0,0006   |
| HSPA1L    | 2,8  | 0,0159   | 2,8 | 0,0165   |
| HSPA7     | 2,7  | 0,0283   | 3,1 | 0,0167   |
| IGFBP5    | 3,4  | 4,34E-05 | 2,3 | 0,001    |
| IGFBP6    | 2,6  | 2,18E-05 | 2,0 | 0,0003   |
| IL17RD    | 2,4  | 0,0003   | 2,0 | 0,0017   |
| IL22RA1   | 2,6  | 0,0022   | 4,5 | 4,94E-05 |
| ITGA11    | 4,1  | 8,20E-05 | 3,0 | 0,0008   |
| ITGBL1    | 2,3  | 0,0329   | 3,1 | 0,0066   |
| KCNJ16    | 12,8 | 0,0006   | 5,5 | 0,0087   |
| KIAA1671  | 2,4  | 0,0264   | 2,4 | 0,0294   |
| KIRREL3   | 4,5  | 0,0176   | 5,6 | 0,0087   |
| KLHL4     | 9,6  | 0,0004   | 3,8 | 0,0134   |
| LGI1      | 8,1  | 0,0066   | 6,8 | 0,0111   |
| LINC01133 | 3,0  | 0,0208   | 2,7 | 0,03     |
| LRRC17    | 2,6  | 0,0122   | 2,4 | 0,0203   |
| LTBP1     | 6,0  | 0,0007   | 2,8 | 0,0236   |
| LUZP2     | 6,9  | 0,0012   | 3,9 | 0,0116   |
| MAPRE2    | 3,8  | 0,0077   | 2,8 | 0,0308   |
| MAST4     | 2,1  | 0,0305   | 2,2 | 0,023    |
| MATN4     | 15,0 | 0,0003   | 5,6 | 0,0087   |
| MET       | 2,2  | 0,0321   | 2,1 | 0,0379   |
| MMP27     | 3,2  | 0,0045   | 2,4 | 0,0212   |
| MPP7      | 5,6  | 4,39E-05 | 3,9 | 0,0004   |
| MUC13     | 2,5  | 0,0097   | 2,1 | 0,0317   |
| MYO5B     | 5,0  | 0,0314   | 8,9 | 0,006    |
| MYOM3     | 2,9  | 0,0031   | 2,9 | 0,0033   |
| NCAM1     | 3,8  | 0,0234   | 6,3 | 0,0037   |
| NCAM1-AS1 | 3,9  | 0,0035   | 3,7 | 0,0048   |
| NEDD9     | 2,7  | 0,0076   | 3,0 | 0,0041   |
| NTM       | 6,5  | 2,66E-05 | 3,1 | 0,002    |
| NTN1      | 3,4  | 0,0084   | 5,6 | 0,0008   |
| NTN4      | 2,9  | 0,0034   | 3,2 | 0,002    |
| PAMR1     | 3,1  | 0,0008   | 2,8 | 0,0018   |
| PCSK6     | 7,2  | 0,0017   | 2,9 | 0,0487   |
| PDE10A    | 2,8  | 0,0147   | 2,7 | 0,0189   |
| PDGFA     | 2,2  | 0,0087   | 2,5 | 0,0028   |
| PDGFC     | 3,3  | 0,0009   | 2,2 | 0,0137   |
| PIEZO2    | 6,5  | 0,0004   | 3,3 | 0,0097   |
| PNLIPRP3  | 3,7  | 0,0138   | 3,5 | 0,0179   |
| PRG4      | 9,5  | 0,0003   | 4,9 | 0,0035   |
| PSD3      | 2,8  | 0,0004   | 2,3 | 0,0022   |
| PXDNL     | 18,1 | 0,0003   | 5,6 | 0,0109   |
| QPCT      | 2,1  | 0,0429   | 2,3 | 0,0306   |
| SEMA3C    | 5,0  | 0,0004   | 2,1 | 0,0492   |

|          |      |          |     |        |
|----------|------|----------|-----|--------|
| SFRP4    | 4,4  | 0,0167   | 5,1 | 0,0105 |
| SHISA6   | 4,0  | 0,0056   | 4,1 | 0,0051 |
| SPAAR    | 2,6  | 0,0493   | 6,4 | 0,0013 |
| SPAG17   | 2,6  | 0,0012   | 2,0 | 0,0086 |
| SPRR2E   | 4,8  | 0,0001   | 3,3 | 0,0012 |
| TEK      | 4,5  | 0,0118   | 4,8 | 0,0095 |
| TFCP2L1  | 3,2  | 0,0447   | 3,6 | 0,0294 |
| TMEM255A | 3,3  | 0,0049   | 2,7 | 0,0123 |
| TMEM35A  | 6,1  | 3,61E-05 | 2,7 | 0,0045 |
| WIF1     | 4,6  | 0,0012   | 3,5 | 0,0048 |
| WNT10B   | 7,2  | 0,0043   | 4,5 | 0,0207 |
| WNT4     | 11,5 | 0,0011   | 4,5 | 0,0218 |

**up -/CD271+ from  
SC**

| Gene name | FC vs -/- | raw P value | FC vs MSCA1+ | raw P value |
|-----------|-----------|-------------|--------------|-------------|
| A2M       | 4,3       | 0,004       | 2,4          | 0,0122      |
| ACE2      | 2,9       | 0,0484      | 7,3          | 0,0012      |
| ADAMTSL2  | 6,1       | 6,71E-07    | 2,1          | 0,0091      |
| ADCY1     | 2,1       | 0,0016      | 2,1          | 0,0039      |
| ADD2      | 2,9       | 0,017       | 7,3          | 0,0019      |
| ADGRB1    | 4,2       | 0,0074      | 4,2          | 0,0177      |
| ANKRD29   | 2,1       | 0,003       | 2,0          | 0,0014      |
| ANO1      | 2,5       | 0,0172      | 2,8          | 0,0277      |
| APLNR     | 16,7      | 0,0062      | 12,5         | 0,0274      |
| ARHGAP15  | 7,6       | 0,0007      | 6,9          | 0,0056      |
| ARHGAP30  | 2,7       | 0,0133      | 3,7          | 0,0008      |
| ATRNL1    | 4,7       | 0,0007      | 4,6          | 0,006       |
| BRSK1     | 2,5       | 0,0026      | 2,2          | 0,0304      |
| CAMK4     | 2,1       | 0,0101      | 3,1          | 0,0028      |
| CARD16    | 2,3       | 0,0158      | 2,3          | 0,0061      |
| CBLN1     | 4,2       | 0,0147      | 7,8          | 0,0036      |
| CCL13     | 4,1       | 0,0184      | 4,6          | 0,031       |
| CCL21     | 8,9       | 0,0077      | 3,1          | 0,0342      |
| CD200R1   | 2,6       | 0,031       | 2,7          | 0,0457      |
| CGNL1     | 4,4       | 0,0015      | 6,1          | 0,0008      |
| CHRM3     | 4,0       | 0,0169      | 3,7          | 0,0486      |
| CHRNB4    | 6,5       | 0,0011      | 4,0          | 0,0214      |
| CLDN1     | 16,0      | 0,0061      | 14,6         | 0,0228      |
| COL21A1   | 2,9       | 0,0023      | 2,8          | 0,0086      |
| COL4A4    | 7,3       | 0,0026      | 2,4          | 0,0424      |
| CORIN     | 2,9       | 0,0046      | 3,5          | 8,45E-05    |
| COX4I2    | 3,0       | 0,0061      | 4,7          | 0,0009      |
| CRLF1     | 8,9       | 0,0003      | 5,5          | 0,0072      |
| CX3CL1    | 3,7       | 0,0461      | 3,5          | 0,0125      |
| CYP19A1   | 6,4       | 0,0004      | 3,0          | 0,0064      |
| DCLK3     | 2,8       | 0,0083      | 2,4          | 0,037       |
| DCX       | 12,7      | 9,56E-06    | 8,8          | 0,0005      |
| DIO2      | 4,6       | 2,10E-06    | 5,8          | 1,07E-05    |
| DYNC1I1   | 2,8       | 0,0004      | 3,5          | 0,0011      |
| EDNRA     | 3,1       | 0,0028      | 2,7          | 0,0086      |
| ELOVL2    | 7,0       | 1,41E-05    | 3,6          | 0,0028      |

|            |      |          |      |          |
|------------|------|----------|------|----------|
| EMID1      | 3,0  | 0,0047   | 3,5  | 0,0023   |
| ENTPD2     | 3,6  | 0,0263   | 9,9  | 0,005    |
| EPB41L2    | 2,0  | 0,0283   | 2,1  | 0,0374   |
| EPHA3      | 14,6 | 5,75E-06 | 29,4 | 1,56E-05 |
| EVA1A      | 3,3  | 0,0042   | 2,1  | 0,0305   |
| F2RL2      | 2,1  | 0,0134   | 2,6  | 0,0048   |
| FAIM2      | 3,3  | 0,001    | 2,3  | 0,0232   |
| FGF12      | 2,6  | 0,0041   | 2,3  | 0,0246   |
| FGF13      | 3,4  | 0,0196   | 3,9  | 0,0048   |
| FMN2       | 6,9  | 0,0006   | 4,5  | 0,0144   |
| FRZB       | 6,8  | 0,0003   | 3,2  | 0,0265   |
| FZD10      | 3,0  | 0,001    | 3,5  | 0,0008   |
| FZD10-AS1  | 3,8  | 0,0087   | 3,0  | 0,0027   |
| GIPC3      | 10,6 | 0,0009   | 4,4  | 0,0082   |
| GNAO1      | 2,6  | 0,0031   | 2,2  | 0,0013   |
| GNAS       | 2,9  | 0,001    | 3,4  | 0,0028   |
| GP1BA      | 4,2  | 0,0015   | 3,1  | 0,0151   |
| GPR162     | 2,9  | 0,0053   | 2,8  | 0,0042   |
| GRIK3      | 4,9  | 0,0079   | 5,8  | 0,0179   |
| HES4       | 2,3  | 0,0001   | 2,2  | 0,0013   |
| HEYL       | 6,8  | 0,0001   | 7,7  | 0,001    |
| HHIP       | 12,5 | 5,82E-06 | 33,2 | 5,50E-06 |
| HMX3       | 2,3  | 0,0396   | 3,4  | 0,0198   |
| HR         | 3,1  | 0,003    | 2,9  | 0,0159   |
| IGFBP7     | 7,2  | 1,02E-07 | 4,3  | 4,36E-05 |
| IGFN1      | 17,6 | 8,99E-08 | 21,7 | 3,81E-06 |
| IKZF3      | 2,6  | 0,0117   | 2,8  | 0,009    |
| IL10RA     | 2,4  | 0,012    | 2,3  | 0,0332   |
| JAK3       | 3,6  | 1,40E-05 | 2,3  | 0,0041   |
| KCNIP1     | 3,6  | 0,0113   | 4,0  | 0,0124   |
| KCNMB4     | 2,0  | 0,0015   | 2,0  | 0,0028   |
| KLK1       | 7,6  | 6,25E-05 | 6,4  | 8,43E-05 |
| LAMB2P1    | 2,5  | 0,0262   | 2,3  | 0,0414   |
| LRRC55     | 5,0  | 0,0001   | 4,1  | 0,0009   |
| LSAMP      | 3,2  | 0,0032   | 2,5  | 0,0357   |
| LY75-CD302 | 3,1  | 2,05E-05 | 2,9  | 8,98E-05 |
| MAP2       | 3,9  | 0,003    | 4,2  | 0,0018   |
| MDFI       | 2,8  | 0,0142   | 2,1  | 0,0463   |
| MEOX2      | 2,9  | 0,0085   | 3,9  | 0,005    |
| MRAP2      | 7,4  | 0,0004   | 4,6  | 0,0118   |
| MYL4       | 3,3  | 0,0264   | 2,9  | 0,0447   |
| MYOC       | 2,5  | 0,0462   | 4,2  | 0,0099   |
| NDUFA4L2   | 3,2  | 0,0335   | 3,4  | 0,0062   |
| NGFR       | 13,5 | 1,45E-08 | 2,4  | 0,0028   |
| NLGN3      | 2,8  | 1,85E-05 | 3,1  | 0,0003   |
| NOTCH3     | 3,5  | 1,36E-06 | 3,0  | 4,06E-05 |
| NOV        | 2,5  | 0,0084   | 6,5  | 0,0002   |
| NOXRED1    | 2,3  | 0,0149   | 2,3  | 0,049    |
| NTRK3      | 6,6  | 0,0066   | 11,1 | 0,0046   |
| NUDT10     | 2,5  | 0,0036   | 3,0  | 0,0033   |
| OXCT2P1    | 2,3  | 0,019    | 2,3  | 0,033    |
| P2RY14     | 4,8  | 0,0019   | 3,8  | 0,0168   |

|           |      |          |      |          |
|-----------|------|----------|------|----------|
| PAG1      | 3,5  | 0,0002   | 3,9  | 0,0009   |
| PCDH17    | 2,6  | 0,0245   | 8,0  | 0,0007   |
| PDE3A     | 2,1  | 0,0005   | 2,1  | 0,0033   |
| PDLIM2    | 3,9  | 0,0018   | 3,0  | 0,0077   |
| PDZD4     | 3,5  | 0,0035   | 2,3  | 0,0024   |
| PGR       | 2,6  | 7,72E-05 | 3,2  | 1,38E-05 |
| PKNOX2    | 3,0  | 0,0038   | 2,5  | 0,0287   |
| PLD5      | 14,0 | 0,0002   | 14,6 | 0,0013   |
| PLPPR4    | 3,2  | 9,18E-05 | 2,6  | 0,0042   |
| POM121L9P | 2,5  | 0,0063   | 2,2  | 0,0192   |
| PPFIA2    | 2,7  | 0,0087   | 7,2  | 5,81E-06 |
| PREX2     | 2,8  | 0,0007   | 2,5  | 0,0006   |
| PTCH2     | 5,4  | 5,35E-07 | 6,7  | 1,40E-05 |
| RASSF2    | 2,2  | 0,0137   | 2,5  | 0,0098   |
| RBM11     | 3,2  | 0,0407   | 2,3  | 0,0274   |
| RELN      | 3,7  | 0,0017   | 2,2  | 0,0415   |
| RNASE10   | 2,1  | 0,001    | 2,1  | 0,008    |
| RUNX2     | 4,3  | 4,79E-06 | 2,7  | 0,001    |
| RXRG      | 2,8  | 0,021    | 2,6  | 0,0344   |
| SAMD11    | 10,7 | 0,0002   | 3,3  | 0,0281   |
| SCG5      | 2,6  | 0,0464   | 2,6  | 0,0473   |
| SCN4B     | 6,3  | 5,29E-05 | 9,0  | 1,49E-06 |
| SCN7A     | 11,8 | 1,96E-06 | 6,7  | 0,0003   |
| SEMA5A    | 6,9  | 3,86E-06 | 3,0  | 0,0018   |
| SEMA5B    | 6,0  | 0,0011   | 2,9  | 0,0406   |
| SERPINA3  | 2,1  | 0,0085   | 3,0  | 0,0009   |
| SERPINE2  | 2,9  | 0,005    | 2,1  | 0,043    |
| SHANK1    | 9,3  | 1,27E-05 | 2,9  | 0,0043   |
| SHOX2     | 2,4  | 0,0053   | 3,3  | 0,0034   |
| SLC7A3    | 3,9  | 0,0088   | 2,8  | 0,0491   |
| SLC8A3    | 4,9  | 0,0005   | 5,0  | 0,0026   |
| SLCO2B1   | 8,0  | 5,23E-06 | 4,6  | 0,0006   |
| SLIT2     | 2,4  | 5,04E-06 | 2,1  | 0,0002   |
| SNAI1     | 3,3  | 0,0012   | 2,2  | 0,0286   |
| SOCS2-AS1 | 2,6  | 0,005    | 2,9  | 0,0044   |
| SOSTDC1   | 7,2  | 7,84E-06 | 7,2  | 0,0003   |
| SOX8      | 2,0  | 0,0167   | 2,1  | 0,004    |
| SPARCL1   | 2,8  | 0,0211   | 2,8  | 0,0122   |
| SPINT1    | 2,4  | 0,0372   | 2,6  | 0,0237   |
| SSTR2     | 4,2  | 1,54E-05 | 2,0  | 0,006    |
| STMN2     | 8,9  | 0,0085   | 8,0  | 0,0172   |
| SUSD2     | 4,9  | 5,24E-05 | 2,2  | 0,0291   |
| SV2A      | 3,8  | 0,0113   | 4,7  | 0,0052   |
| SV2B      | 4,6  | 0,0011   | 9,0  | 0,0009   |
| SYNDIG1   | 11,6 | 0,0003   | 7,7  | 0,0038   |
| TAC1      | 2,9  | 0,0055   | 2,8  | 0,0234   |
| TENM2     | 6,5  | 0,0018   | 8,3  | 0,002    |
| TENM4     | 4,1  | 8,23E-05 | 3,4  | 0,0023   |
| THBS4     | 5,2  | 0,0207   | 4,2  | 0,0423   |
| TLL1      | 2,9  | 0,0034   | 4,1  | 0,0011   |
| TMC4      | 5,5  | 5,49E-05 | 4,3  | 0,0015   |
| TMEFF2    | 11,2 | 8,31E-05 | 9,5  | 0,0003   |

|           |      |          |      |          |
|-----------|------|----------|------|----------|
| TMEM233   | 2,1  | 0,0052   | 4,8  | 8,32E-05 |
| TNFAIP8L3 | 4,1  | 0,0014   | 8,4  | 0,0001   |
| TOX       | 12,3 | 0,0002   | 11,6 | 0,0006   |
| TRNP1     | 2,5  | 0,0091   | 3,4  | 0,0067   |
| TRPC6     | 6,5  | 0,0006   | 5,1  | 0,0073   |
| TSPAN11   | 5,7  | 1,36E-05 | 2,7  | 0,006    |
| TSPAN8    | 5,3  | 0,0001   | 6,3  | 0,0004   |
| UNC5B     | 2,5  | 8,28E-05 | 2,6  | 5,06E-05 |
| VAV1      | 2,5  | 0,0213   | 2,4  | 0,0148   |
| VDR       | 2,1  | 0,0007   | 2,3  | 0,0007   |
| VIPR2     | 4,4  | 1,79E-05 | 2,6  | 0,0016   |
| VMO1      | 2,4  | 0,0007   | 2,9  | 0,0005   |
| VSTM2L    | 5,3  | 0,002    | 7,0  | 0,0023   |
| ZFP69B    | 2,4  | 0,0129   | 2,5  | 0,0122   |

**up in MSCA1+ from  
SC**

| Gene name | FC vs -/CD271+ | raw P value | FC vs -/- | raw P value |
|-----------|----------------|-------------|-----------|-------------|
| ADAM12    | 2,6            | 0,0489      | 3,3       | 0,0194      |
| ALPL      | 18,8           | 7,60E-05    | 13,1      | 1,03E-05    |
| BUB1      | 2,5            | 0,0396      | 3,4       | 0,0222      |
| CHI3L1    | 3,2            | 0,0045      | 12,1      | 1,44E-05    |
| CLEC2L    | 2,1            | 0,0055      | 2,9       | 0,0002      |
| CPA1      | 3,0            | 0,0085      | 2,6       | 0,0134      |
| EGFL6     | 3,2            | 0,0258      | 4,0       | 0,0165      |
| GINS1     | 2,4            | 0,0293      | 2,6       | 0,0198      |
| GRIA1     | 2,8            | 0,0029      | 2,6       | 0,0049      |
| MEST      | 2,6            | 0,0067      | 2,3       | 0,0054      |
| MOXD1     | 2,3            | 0,0123      | 2,9       | 0,0069      |
| PRSS8     | 3,0            | 0,0208      | 2,3       | 0,041       |
| RAD51AP1  | 3,3            | 0,0255      | 2,5       | 0,0494      |
| SBSPON    | 3,9            | 0,0181      | 3,0       | 0,0277      |
| SEPT4     | 2,7            | 0,038       | 4,1       | 0,0033      |
| SLC25A18  | 2,5            | 0,004       | 2,6       | 0,0004      |
| SLC7A10   | 3,3            | 0,017       | 3,8       | 0,0126      |
| SLC7A8    | 2,3            | 0,0124      | 2,1       | 0,0193      |
| SUSD3     | 3,0            | 0,0221      | 2,9       | 0,0214      |
| TCF21     | 4,8            | 0,0178      | 3,8       | 0,0357      |
| UBQLNL    | 2,2            | 0,0018      | 2,4       | 0,0115      |

**Supplementary Table 3: list of transcripts expressed by the 3 progenitor subsets specifically in subcutaneous or visceral AT**

Gene name followed by the fold change of indicated subset from a location over the same subset in the other location and raw P value

**up in SC versus VS**

| Gene name | FC -/- | raw P value | FC - /CD271+ | raw P value | FC MSCA1+ | raw P value |
|-----------|--------|-------------|--------------|-------------|-----------|-------------|
| AADAC     | 6,7    | 0,0036      | 30,2         | 2,01E-05    | 102,4     | 4,16E-08    |
| ABCB4     | 25,1   | 7,82E-06    | 7,3          | 0,0002      | 7,7       | 0,002       |
| ABCF1     | 2,4    | 0,0038      | 2,5          | 0,0166      | 2,3       | 0,0099      |
| ADA       | 5,4    | 0,0003      | 2,4          | 0,0007      | 2,6       | 0,0052      |
| ADGRE5    | 4,1    | 0,0002      | 3,6          | 0,0002      | 4,6       | 1,14E-05    |
| AGMO      | 2,9    | 0,0375      | 3,3          | 0,0003      | 3,1       | 0,0159      |
| AKR1B15   | 11,2   | 0,0068      | 10,9         | 0,0066      | 6,3       | 0,0141      |
| ALKBH1    | 2,0    | 0,0031      | 2,8          | 0,0055      | 2,9       | 0,0011      |
| ALX1      | 24,6   | 3,90E-07    | 12,8         | 0,0002      | 23,9      | 4,17E-07    |
| ANGPTL4   | 4,4    | 0,0019      | 3,3          | 0,006       | 2,4       | 0,012       |
| ANPEP     | 5,4    | 0,0005      | 4,0          | 0,0012      | 3,5       | 0,0006      |
| APOC1     | 60,0   | 8,94E-06    | 19,7         | 5,90E-07    | 14,6      | 6,65E-05    |
| AQP7      | 10,1   | 7,48E-05    | 3,2          | 0,0078      | 6,6       | 0,001       |
| ARNTL2    | 2,8    | 0,0063      | 8,8          | 0,0018      | 6,7       | 0,0099      |
| BCCIP     | 2,4    | 0,0085      | 2,2          | 0,045       | 2,1       | 0,0291      |
| C11orf53  | 21,4   | 4,65E-06    | 13,1         | 2,17E-05    | 16,1      | 0,0014      |
| C14orf180 | 84,2   | 3,30E-09    | 10,3         | 0,0021      | 18,3      | 0,0023      |
| C14orf39  | 26,5   | 2,60E-07    | 19,6         | 0,0005      | 14,5      | 0,0004      |
| C3orf36   | 7,2    | 2,15E-06    | 3,7          | 0,0009      | 3,1       | 0,008       |
| C3orf67   | 9,9    | 3,13E-07    | 3,9          | 0,0219      | 4,4       | 0,007       |
| C5orf38   | 21,0   | 3,35E-06    | 17,3         | 1,77E-06    | 16,5      | 0,0005      |
| C6orf141  | 4,8    | 0,0231      | 3,3          | 0,0416      | 4,2       | 0,0143      |
| C8orf76   | 45,9   | 0,0086      | 42,1         | 0,0282      | 366,4     | 4,71E-10    |
| CA12      | 2,6    | 0,0101      | 2,3          | 0,0263      | 3,1       | 0,0043      |
| CA2       | 5,8    | 2,11E-05    | 2,4          | 0,0073      | 4,5       | 0,0419      |
| CACNB4    | 2,9    | 0,0025      | 2,9          | 0,0044      | 3,1       | 0,0006      |
| CCL19     | 11,1   | 0,0068      | 14,3         | 0,0005      | 3,8       | 0,0104      |
| CCNA1     | 4,9    | 0,006       | 9,7          | 0,0074      | 7,3       | 0,0001      |
| CD36      | 39,8   | 5,15E-05    | 7,3          | 0,0032      | 10,9      | 0,0012      |
| CD9       | 2,0    | 0,0473      | 3,5          | 0,0001      | 8,4       | 0,0002      |
| CDH12     | 16,7   | 0,0052      | 11,1         | 3,86E-05    | 20,6      | 0,0004      |
| CDHR4     | 3,8    | 0,0047      | 3,1          | 0,0237      | 9,3       | 0,0012      |
| CDKL1     | 3,3    | 0,004       | 2,2          | 0,0072      | 2,7       | 0,0281      |
| CDYL      | 2,3    | 0,0009      | 2,1          | 0,0009      | 2,4       | 5,52E-05    |
| CEBPG     | 2,5    | 0,0065      | 2,5          | 0,013       | 3,0       | 0,0037      |



|          |      |          |       |          |      |          |
|----------|------|----------|-------|----------|------|----------|
| CFH      | 4,2  | 0,0003   | 5,3   | 4,19E-05 | 4,1  | 0,0006   |
| CGREF1   | 7,3  | 0,0014   | 8,2   | 0,0005   | 3,4  | 0,0024   |
| CHRNA5   | 2,5  | 0,0016   | 3,9   | 7,46E-05 | 2,5  | 0,0187   |
| CIDEC    | 42,7 | 0,0001   | 7,0   | 0,0019   | 6,6  | 0,0067   |
| CLIC6    | 11,6 | 0,0015   | 7,6   | 0,0002   | 8,5  | 7,48E-05 |
| CMA1     | 4,2  | 0,0179   | 3,9   | 0,0463   | 4,8  | 0,0112   |
| CNIH3    | 7,2  | 0,0001   | 4,2   | 0,0007   | 4,1  | 0,0039   |
| CNTN3    | 31,2 | 1,66E-06 | 3,2   | 0,0081   | 5,4  | 0,0012   |
| COPS8    | 2,2  | 0,0008   | 2,8   | 0,0029   | 2,5  | 0,0021   |
| COX4I2   | 7,1  | 0,0006   | 16,0  | 0,0003   | 3,0  | 0,0404   |
| CPM      | 11,8 | 0,0022   | 4,5   | 0,0006   | 5,5  | 0,0157   |
| CPT1B    | 4,4  | 0,0123   | 2,1   | 0,0359   | 7,0  | 0,0196   |
| CRNDE    | 97,2 | 6,24E-06 | 121,5 | 2,39E-08 | 93,3 | 1,57E-06 |
| CRYM     | 3,1  | 0,019    | 4,1   | 0,0164   | 3,5  | 0,018    |
| CSMD2    | 2,4  | 0,0042   | 5,7   | 0,003    | 3,9  | 0,0092   |
| CTHRC1   | 24,9 | 0,0001   | 7,8   | 0,0006   | 5,3  | 0,0285   |
| CTSG     | 3,5  | 0,028    | 10,7  | 0,0021   | 10,7 | 0,0031   |
| CTSS     | 3,0  | 0,007    | 2,4   | 0,0003   | 2,1  | 0,0021   |
| CXCL14   | 30,5 | 5,07E-09 | 2,9   | 0,003    | 2,5  | 0,0396   |
| CYP19A1  | 5,2  | 0,0102   | 14,9  | 1,38E-06 | 5,3  | 0,0097   |
| CYP4F12  | 2,0  | 0,0089   | 2,3   | 0,0037   | 3,1  | 0,0012   |
| DCAF12L2 | 17,7 | 0,0003   | 24,7  | 1,47E-05 | 12,7 | 0,0007   |
| DCLK3    | 4,6  | 0,0006   | 6,1   | 0,0005   | 4,3  | 0,009    |
| DGAT2    | 16,4 | 0,0006   | 11,7  | 0,001    | 24,2 | 0,0003   |
| DHRS9    | 22,6 | 0,0003   | 14,7  | 0,0002   | 25,0 | 0,0007   |
| DIO2     | 4,7  | 0,0362   | 21,3  | 2,37E-07 | 5,1  | 7,06E-05 |
| DKC1     | 2,7  | 0,0304   | 2,8   | 0,027    | 2,7  | 0,0209   |
| DKK2     | 9,1  | 0,0005   | 65,3  | 2,30E-06 | 22,9 | 0,0003   |
| DMRT2    | 57,2 | 3,49E-05 | 14,4  | 0,0024   | 11,4 | 0,0004   |
| DTX4     | 4,2  | 0,0022   | 2,4   | 0,0063   | 2,5  | 0,0043   |
| E2F3     | 2,9  | 0,0284   | 3,1   | 0,0409   | 3,0  | 0,0084   |
| ECM1     | 5,4  | 0,0034   | 2,3   | 0,0191   | 4,0  | 0,0082   |
| ELOVL4   | 2,9  | 0,0468   | 2,3   | 0,005    | 3,3  | 0,0011   |
| EMCN     | 39,6 | 3,42E-06 | 31,2  | 2,11E-05 | 49,2 | 0,0011   |
| EMX2     | 24,7 | 0,0003   | 19,6  | 0,002    | 47,5 | 4,37E-05 |
| EMX2OS   | 29,7 | 7,12E-05 | 19,6  | 0,0007   | 35,0 | 0,0008   |
| EN1      | 14,8 | 0,0005   | 23,4  | 4,28E-07 | 22,8 | 0,0016   |
| ENTHD1   | 3,2  | 0,0012   | 3,8   | 0,0123   | 4,0  | 0,0251   |
| EPHA4    | 3,4  | 0,0047   | 3,4   | 0,0074   | 5,2  | 0,002    |
| ETS2     | 3,7  | 2,69E-05 | 3,1   | 0,0012   | 2,9  | 0,0043   |
| F2R      | 4,4  | 0,0002   | 6,9   | 9,19E-05 | 5,3  | 0,0112   |
| FAM196A  | 2,7  | 0,0149   | 3,0   | 0,0327   | 3,4  | 0,0007   |
| FGFBP2   | 45,4 | 3,20E-06 | 8,0   | 0,0004   | 30,5 | 0,0003   |
| FGL2     | 12,8 | 0,0005   | 5,6   | 0,0004   | 4,4  | 0,0042   |
| FLVCR1   | 2,2  | 0,0145   | 2,5   | 0,0083   | 2,2  | 0,0472   |

|           |      |          |      |          |      |          |
|-----------|------|----------|------|----------|------|----------|
| FNDC1     | 5,1  | 0,0048   | 5,0  | 0,0009   | 9,7  | 0,0033   |
| FNIP2     | 2,7  | 0,0048   | 2,7  | 0,0052   | 2,6  | 0,0019   |
| FOXD2-AS1 | 6,6  | 0,0019   | 3,0  | 0,0096   | 3,2  | 0,0323   |
| FOXF2     | 8,0  | 0,0002   | 4,4  | 0,0002   | 3,4  | 0,0019   |
| FOXQ1     | 4,5  | 0,0082   | 3,4  | 0,0492   | 5,5  | 0,0081   |
| FST       | 15,1 | 0,0003   | 3,0  | 0,0222   | 4,9  | 0,0023   |
| FUT4      | 3,3  | 6,65E-05 | 2,4  | 0,0005   | 2,9  | 6,81E-05 |
| GDF10     | 45,1 | 6,68E-08 | 10,5 | 1,15E-05 | 7,3  | 0,0002   |
| GINS3     | 3,2  | 0,0006   | 2,9  | 0,0013   | 3,2  | 0,0007   |
| GJC1      | 15,8 | 6,43E-05 | 6,2  | 0,0152   | 3,2  | 0,0428   |
| GLDN      | 11,3 | 0,0001   | 10,2 | 0,0001   | 2,6  | 0,0179   |
| GLRB      | 2,9  | 0,0413   | 3,0  | 0,0125   | 5,9  | 0,0055   |
| GNA13     | 2,8  | 0,0003   | 2,2  | 0,0001   | 2,8  | 0,0001   |
| GPBAR1    | 4,3  | 0,0194   | 3,4  | 0,0237   | 11,1 | 5,25E-06 |
| GPD1      | 20,1 | 0,0005   | 13,5 | 0,0045   | 22,8 | 0,0008   |
| GPR68     | 9,0  | 0,0003   | 11,3 | 0,002    | 6,5  | 0,0004   |
| GRM7      | 9,2  | 0,0121   | 13,1 | 0,0014   | 17,0 | 0,0045   |
| GRWD1     | 2,1  | 0,0131   | 2,5  | 0,0095   | 2,5  | 0,0122   |
| HAGLR     | 3,9  | 0,0019   | 4,1  | 0,0017   | 3,5  | 0,0186   |
| HAS2      | 5,3  | 0,0008   | 3,7  | 0,0001   | 4,5  | 0,0002   |
| HAVCR1    | 10,0 | 0,0002   | 3,8  | 0,0004   | 8,0  | 0,0048   |
| HDAC9     | 15,5 | 1,54E-06 | 17,9 | 1,77E-05 | 6,9  | 0,0208   |
| HES1      | 7,1  | 0,0023   | 6,9  | 3,71E-05 | 5,0  | 0,0019   |
| HIPK2     | 3,0  | 0,0092   | 3,3  | 0,0113   | 3,1  | 0,0112   |
| HIVEP3    | 4,1  | 0,0472   | 2,7  | 0,0226   | 2,2  | 0,0487   |
| HMGA2     | 18,9 | 0,0005   | 20,1 | 0,0014   | 12,7 | 0,0064   |
| HMGCR     | 2,2  | 0,0056   | 2,5  | 0,0014   | 3,5  | 0,0005   |
| HOXA10    | 6,6  | 0,0002   | 30,1 | 2,45E-05 | 31,2 | 4,11E-06 |
| HOXA9     | 12,7 | 0,0001   | 18,5 | 5,20E-06 | 16,1 | 0,0011   |
| HOXC10    | 58,2 | 6,39E-08 | 52,0 | 1,46E-05 | 77,2 | 2,90E-07 |
| HOXC8     | 15,7 | 5,41E-06 | 30,6 | 2,88E-06 | 20,9 | 0,0011   |
| HOXC9     | 62,1 | 3,01E-07 | 73,6 | 1,13E-07 | 30,9 | 0,0006   |
| HOXD-AS2  | 23,7 | 1,16E-06 | 21,5 | 2,34E-07 | 13,6 | 0,0003   |
| HOXD1     | 4,0  | 0,0025   | 5,2  | 0,0001   | 3,0  | 0,0088   |
| HOXD3     | 3,1  | 0,0075   | 4,5  | 9,37E-07 | 3,3  | 0,0297   |
| HOXD4     | 4,5  | 0,0005   | 5,9  | 0,0016   | 8,8  | 5,57E-05 |
| HOXD8     | 29,5 | 3,79E-05 | 24,4 | 0,0001   | 18,4 | 0,0008   |
| HOXD9     | 6,2  | 0,0015   | 3,6  | 0,0274   | 4,9  | 0,0211   |
| HPGD      | 5,8  | 0,0136   | 4,7  | 0,0015   | 4,7  | 0,0083   |
| HPSE2     | 15,0 | 0,0015   | 2,8  | 0,0246   | 10,4 | 0,0039   |
| HS3ST2    | 43,7 | 0,0007   | 34,5 | 0,0003   | 24,5 | 0,0008   |
| IGFN1     | 2,6  | 0,0031   | 22,6 | 0,0004   | 3,3  | 0,0001   |
| IL7       | 3,9  | 0,0024   | 8,4  | 9,58E-05 | 8,7  | 0,0015   |
| IMP4      | 2,0  | 0,0219   | 2,4  | 0,0403   | 2,2  | 0,0412   |
| IMPAD1    | 2,3  | 0,0028   | 2,2  | 0,0165   | 2,2  | 0,0016   |

|           |       |          |       |          |       |          |
|-----------|-------|----------|-------|----------|-------|----------|
| IRAK2     | 8,8   | 0,0008   | 3,5   | 0,0111   | 4,4   | 0,0111   |
| IRF4      | 40,9  | 5,28E-06 | 9,7   | 0,0002   | 8,3   | 0,0002   |
| IRX1      | 48,0  | 4,55E-06 | 245,8 | 5,78E-07 | 137,0 | 5,87E-05 |
| IRX2      | 245,0 | 1,44E-10 | 137,6 | 8,61E-08 | 182,7 | 2,08E-07 |
| IRX3      | 28,5  | 3,96E-05 | 16,0  | 1,66E-07 | 6,7   | 0,0007   |
| IRX5      | 48,3  | 4,59E-08 | 71,8  | 4,66E-07 | 70,1  | 7,78E-07 |
| ITGA4     | 14,0  | 3,57E-05 | 4,1   | 0,0001   | 2,6   | 0,0123   |
| ITGA7     | 3,6   | 0,0004   | 7,8   | 5,02E-06 | 7,9   | 0,0006   |
| ITGBL1    | 22,5  | 0,0002   | 25,4  | 1,77E-05 | 16,5  | 0,001    |
| ITM2A     | 3,1   | 0,0275   | 2,6   | 0,0048   | 2,5   | 0,0333   |
| KCNJ15    | 15,2  | 0,0002   | 21,5  | 0,0029   | 14,4  | 0,0044   |
| KCTD5     | 2,3   | 0,0031   | 2,3   | 0,0445   | 2,2   | 0,0268   |
| KDM7A     | 3,1   | 0,0008   | 2,7   | 0,0037   | 2,3   | 0,0138   |
| KHDRBS3   | 2,3   | 0,0012   | 3,4   | 0,0001   | 3,3   | 0,0007   |
| KIAA0930  | 3,7   | 1,06E-05 | 2,3   | 3,19E-05 | 2,5   | 1,44E-06 |
| KIAA1549L | 26,6  | 3,07E-06 | 35,1  | 4,35E-07 | 25,7  | 0,0012   |
| KSR2      | 5,2   | 0,001    | 4,1   | 0,0493   | 7,2   | 0,0006   |
| LANCL3    | 9,0   | 0,0016   | 9,2   | 0,0003   | 9,1   | 0,0041   |
| LGR4      | 3,1   | 0,0055   | 5,3   | 1,55E-05 | 4,2   | 0,0004   |
| LINC00645 | 10,6  | 9,79E-05 | 4,1   | 0,0039   | 7,4   | 0,0009   |
| LINC01013 | 4,8   | 0,0063   | 6,2   | 0,0031   | 5,5   | 0,007    |
| LINC01060 | 16,9  | 0,0002   | 23,0  | 0,0009   | 20,8  | 0,0188   |
| LINC01116 | 12,1  | 0,0012   | 11,2  | 0,0049   | 5,0   | 0,0002   |
| LOC154761 | 3,7   | 0,0011   | 2,1   | 0,0164   | 2,4   | 0,0472   |
| LPL       | 22,9  | 4,23E-06 | 5,8   | 4,23E-05 | 3,0   | 0,0466   |
| LRRC15    | 17,6  | 0,0002   | 7,7   | 0,0001   | 3,1   | 0,0084   |
| LRRC32    | 5,0   | 0,0001   | 6,5   | 3,54E-05 | 3,8   | 0,0112   |
| MAP1A     | 3,1   | 0,0008   | 3,1   | 0,0008   | 3,8   | 0,0002   |
| MAP3K7CL  | 2,0   | 0,0058   | 4,2   | 4,08E-06 | 3,4   | 0,0088   |
| MAPK13    | 2,5   | 0,0091   | 3,6   | 0,0048   | 2,1   | 0,0009   |
| MARS2     | 2,9   | 0,0004   | 4,2   | 0,0097   | 3,6   | 0,0042   |
| MAS1      | 6,4   | 0,0002   | 6,6   | 0,0027   | 2,9   | 0,0453   |
| MC5R      | 2,2   | 0,002    | 2,3   | 0,0282   | 3,7   | 0,0092   |
| MEOX1     | 3,2   | 0,048    | 4,1   | 0,0049   | 3,7   | 0,0386   |
| MGC12916  | 5,8   | 0,005    | 7,0   | 0,0013   | 9,4   | 0,008    |
| MINDY4    | 68,2  | 0,0005   | 36,9  | 0,0018   | 24,9  | 0,0046   |
| MME       | 15,4  | 5,85E-05 | 5,8   | 0,0027   | 5,0   | 0,0149   |
| MMP27     | 4,7   | 0,0083   | 8,1   | 0,006    | 13,5  | 0,0014   |
| MMP3      | 7,8   | 0,0016   | 5,6   | 0,0023   | 3,8   | 0,0447   |
| MRAP2     | 5,2   | 0,0006   | 20,8  | 0,0001   | 9,9   | 0,0022   |
| MSR1      | 16,7  | 1,27E-07 | 5,3   | 0,0144   | 7,5   | 0,0053   |
| MSX1      | 5,2   | 0,0101   | 3,1   | 0,0234   | 2,1   | 0,0486   |
| MXD1      | 2,9   | 0,0002   | 2,1   | 0,0038   | 2,3   | 0,0028   |
| MYADM     | 2,2   | 0,0017   | 2,2   | 1,53E-05 | 2,3   | 0,0002   |
| MYH14     | 3,3   | 0,0198   | 8,4   | 0,008    | 9,8   | 0,0064   |

|          |       |          |       |          |       |          |
|----------|-------|----------|-------|----------|-------|----------|
| MYO1D    | 2,9   | 0,0466   | 4,5   | 3,86E-05 | 3,9   | 0,0005   |
| NCOA5    | 2,3   | 0,002    | 2,3   | 0,0077   | 2,8   | 0,0002   |
| NDNF     | 3,4   | 0,0322   | 8,9   | 1,46E-05 | 6,4   | 0,0005   |
| NDUF4F4  | 2,4   | 0,0012   | 2,3   | 0,0153   | 2,4   | 0,0296   |
| NFATC2   | 5,1   | 0,0017   | 3,7   | 0,002    | 2,6   | 0,036    |
| NIFK     | 2,1   | 0,0226   | 3,3   | 0,0037   | 3,1   | 0,003    |
| NIP7     | 2,5   | 0,0136   | 2,7   | 0,0165   | 3,1   | 0,0042   |
| NKAIN1   | 5,5   | 0,0016   | 9,9   | 0,0001   | 4,1   | 0,0406   |
| NLN      | 2,1   | 0,0169   | 2,9   | 0,0185   | 2,3   | 0,0428   |
| NMUR2    | 16,6  | 0,0005   | 30,9  | 6,94E-07 | 47,0  | 3,96E-06 |
| NNAT     | 7,9   | 0,0004   | 5,0   | 8,32E-05 | 3,4   | 0,0327   |
| NOV      | 4,4   | 0,0028   | 29,4  | 1,79E-05 | 13,6  | 0,0005   |
| NPAS2    | 2,2   | 0,0223   | 2,3   | 0,0052   | 3,1   | 0,0008   |
| NRG2     | 3,5   | 0,0101   | 2,1   | 0,0217   | 4,5   | 0,0015   |
| NRN1     | 47,2  | 2,96E-06 | 32,3  | 0,0002   | 60,5  | 3,56E-05 |
| NUDT15   | 2,0   | 9,81E-05 | 2,5   | 0,0002   | 2,7   | 2,68E-05 |
| OLFM1    | 3,5   | 0,0032   | 2,2   | 0,011    | 2,8   | 0,0271   |
| PAX3     | 280,3 | 3,62E-06 | 597,3 | 1,54E-09 | 281,9 | 7,01E-07 |
| PCSK1    | 25,0  | 5,66E-05 | 13,0  | 0,0007   | 8,8   | 0,0024   |
| PDE1B    | 29,6  | 0,0001   | 2,2   | 0,0085   | 2,6   | 0,0024   |
| PEAK1    | 2,8   | 0,0006   | 2,3   | 0,0017   | 2,1   | 0,0032   |
| PHACTR2  | 2,4   | 0,0004   | 3,7   | 0,0001   | 2,2   | 0,0154   |
| PLIN1    | 25,0  | 0,0011   | 7,8   | 0,0081   | 9,2   | 0,0087   |
| PLXNB3   | 8,5   | 6,81E-05 | 2,5   | 0,0022   | 3,0   | 0,0034   |
| PNLIPRP3 | 15,3  | 0,0002   | 4,7   | 0,0185   | 5,7   | 0,0023   |
| PNP      | 2,8   | 0,0077   | 2,5   | 3,65E-06 | 2,0   | 0,0005   |
| POLR1C   | 3,4   | 0,0004   | 2,7   | 0,0216   | 3,0   | 0,0153   |
| POLR2D   | 2,2   | 0,0011   | 2,6   | 0,0054   | 2,3   | 0,0055   |
| POPDC3   | 4,1   | 0,0068   | 16,7  | 0,0007   | 15,4  | 0,0002   |
| PPAN     | 2,5   | 0,012    | 2,7   | 0,0394   | 2,9   | 0,0043   |
| PPL      | 2,2   | 0,0055   | 3,0   | 0,0058   | 4,2   | 0,0013   |
| PPM1L    | 5,3   | 0,0007   | 4,0   | 1,22E-05 | 5,9   | 6,90E-05 |
| PRKG2    | 6,1   | 0,0022   | 17,0  | 3,95E-05 | 48,9  | 1,21E-05 |
| PTCH2    | 11,8  | 1,56E-05 | 12,9  | 0,0003   | 5,0   | 0,0013   |
| PTGER2   | 7,2   | 0,0014   | 2,5   | 0,0293   | 3,3   | 0,0162   |
| PTGER3   | 3,9   | 0,0071   | 7,0   | 0,0003   | 4,5   | 0,0004   |
| PTGES    | 2,8   | 0,0131   | 2,8   | 0,0004   | 2,8   | 0,0026   |
| PTGFR    | 3,9   | 0,0015   | 3,1   | 0,0125   | 3,3   | 0,0009   |
| PTPRE    | 4,9   | 0,0236   | 8,3   | 0,0066   | 8,4   | 0,0018   |
| PTPRT    | 5,0   | 0,0006   | 4,6   | 0,0006   | 14,2  | 0,0048   |
| PXDC1    | 2,8   | 8,94E-05 | 2,0   | 0,0016   | 2,1   | 7,58E-05 |
| RANBP17  | 4,7   | 0,0179   | 5,3   | 0,0006   | 4,5   | 0,0099   |
| RBM3     | 2,6   | 0,0009   | 2,4   | 0,0025   | 2,3   | 0,0067   |
| RELN     | 3,6   | 0,002    | 3,7   | 0,0111   | 4,3   | 0,0009   |
| REXO5    | 3,0   | 0,0039   | 2,1   | 0,0076   | 2,1   | 0,017    |

|          |       |          |       |          |      |          |
|----------|-------|----------|-------|----------|------|----------|
| RPP40    | 2,0   | 0,0057   | 3,4   | 0,002    | 3,0  | 0,0062   |
| RPSAP52  | 13,3  | 0,0043   | 17,9  | 0,0004   | 21,0 | 0,0072   |
| RRN3     | 2,2   | 0,0038   | 2,1   | 0,0187   | 2,2  | 0,0036   |
| RRS1     | 2,2   | 0,016    | 2,5   | 0,0291   | 2,7  | 0,0282   |
| RSRP1    | 3,8   | 0,0005   | 2,8   | 0,0026   | 2,2  | 0,0151   |
| S100P    | 7,2   | 0,0139   | 11,3  | 0,0086   | 9,1  | 0,0204   |
| SACS     | 2,2   | 0,0048   | 2,1   | 0,0024   | 2,1  | 0,0039   |
| SALL1    | 16,1  | 0,0006   | 12,3  | 0,0006   | 25,4 | 0,0081   |
| SATB2    | 7,2   | 0,0011   | 6,4   | 1,45E-05 | 4,5  | 0,0036   |
| SBK3     | 12,1  | 0,0007   | 3,7   | 0,0033   | 6,9  | 0,0041   |
| SEMA3G   | 22,3  | 5,93E-05 | 10,5  | 0,0023   | 8,6  | 0,0018   |
| SERINC2  | 2,3   | 0,0175   | 4,7   | 0,0017   | 8,4  | 0,0022   |
| SERPINA5 | 78,4  | 5,24E-06 | 14,4  | 7,26E-05 | 19,6 | 0,0007   |
| SERPINF2 | 5,0   | 0,0036   | 2,6   | 0,015    | 2,2  | 0,0395   |
| SGIP1    | 6,1   | 0,0022   | 6,7   | 0,0007   | 10,7 | 0,002    |
| SHC3     | 3,1   | 0,0121   | 2,6   | 0,0112   | 4,6  | 0,0493   |
| SHISA2   | 15,8  | 1,76E-05 | 3,2   | 0,0006   | 4,5  | 0,0068   |
| SIM1     | 11,3  | 4,45E-05 | 6,4   | 4,59E-06 | 10,4 | 7,78E-05 |
| SIM2     | 7,3   | 0,0258   | 6,9   | 0,0271   | 12,4 | 0,0141   |
| SIX1     | 5,9   | 0,0262   | 6,9   | 0,002    | 7,2  | 0,0007   |
| SLC35G1  | 2,3   | 0,0079   | 3,0   | 0,0137   | 2,6  | 0,0057   |
| SLC5A3   | 4,5   | 0,0002   | 3,4   | 0,0022   | 2,6  | 0,0487   |
| SLC6A15  | 75,1  | 5,30E-06 | 57,8  | 5,76E-06 | 39,3 | 0,0007   |
| SLC6A2   | 15,8  | 0,0012   | 9,1   | 0,0005   | 6,4  | 0,0029   |
| SLCO2A1  | 26,7  | 8,02E-05 | 16,1  | 8,23E-05 | 22,7 | 3,83E-05 |
| SMOC1    | 232,3 | 1,81E-06 | 16,4  | 0,0034   | 21,8 | 0,019    |
| SNX7     | 2,1   | 0,0162   | 2,3   | 0,0001   | 3,4  | 1,15E-06 |
| SORT1    | 10,1  | 4,50E-05 | 3,1   | 0,0095   | 9,0  | 0,001    |
| SP9      | 11,3  | 0,0002   | 4,8   | 0,002    | 4,7  | 0,0089   |
| SPAG17   | 32,5  | 7,55E-05 | 21,6  | 1,36E-05 | 25,4 | 5,60E-06 |
| STAC     | 7,3   | 0,0002   | 5,4   | 0,0162   | 6,6  | 0,0111   |
| STMN2    | 17,4  | 0,0004   | 155,7 | 4,56E-07 | 19,4 | 0,0012   |
| SUCNR1   | 5,9   | 0,0149   | 7,4   | 0,012    | 5,8  | 0,0227   |
| SYNM     | 6,7   | 0,0006   | 2,3   | 0,0222   | 2,8  | 0,0098   |
| TAF5     | 3,2   | 3,90E-05 | 2,2   | 0,009    | 2,9  | 0,0005   |
| TBX4     | 4,0   | 0,0031   | 3,1   | 0,0141   | 3,6  | 0,0228   |
| TBX5     | 46,1  | 2,09E-05 | 53,2  | 2,34E-06 | 57,4 | 7,09E-07 |
| TENM1    | 5,6   | 0,0068   | 39,1  | 1,60E-05 | 56,0 | 3,46E-06 |
| TFIP11   | 2,2   | 0,0002   | 2,3   | 0,0009   | 2,4  | 0,0002   |
| TM6SF2   | 3,0   | 0,0012   | 4,6   | 0,0153   | 2,8  | 0,0006   |
| TMEM47   | 3,1   | 1,72E-05 | 2,6   | 0,0006   | 2,8  | 0,0002   |
| TNMD     | 19,4  | 1,41E-05 | 5,1   | 0,0016   | 9,1  | 0,0015   |
| TRABD2A  | 8,1   | 0,0059   | 5,1   | 0,0032   | 8,3  | 0,0018   |
| TRIM35   | 3,1   | 4,84E-05 | 2,9   | 0,0108   | 4,1  | 0,0039   |
| TRIM36   | 3,7   | 0,0056   | 2,3   | 0,0069   | 2,6  | 0,0315   |

|         |      |          |      |          |      |          |
|---------|------|----------|------|----------|------|----------|
| TSPAN11 | 4,6  | 1,45E-05 | 3,5  | 0,0011   | 2,5  | 0,0131   |
| TSPAN15 | 14,0 | 5,74E-05 | 3,4  | 0,0128   | 3,9  | 0,0161   |
| TTPAL   | 3,3  | 0,0041   | 2,6  | 0,0248   | 2,9  | 0,0039   |
| UPP1    | 3,7  | 0,0007   | 2,7  | 0,0222   | 3,1  | 0,0148   |
| URB2    | 2,7  | 0,0158   | 3,3  | 0,0093   | 2,9  | 0,0066   |
| USPL1   | 3,1  | 0,0002   | 2,4  | 0,0071   | 2,6  | 0,0096   |
| UTP15   | 2,1  | 0,0281   | 2,3  | 0,0088   | 2,7  | 0,0034   |
| VCAN    | 4,3  | 0,0213   | 8,1  | 0,0001   | 5,0  | 0,0261   |
| VGLL4   | 2,2  | 0,0411   | 2,4  | 0,0127   | 2,2  | 0,0138   |
| WDCP    | 3,0  | 0,0239   | 3,7  | 0,0004   | 4,1  | 0,0052   |
| WDR47   | 2,1  | 0,0007   | 2,1  | 0,0016   | 2,2  | 0,0098   |
| XG      | 44,7 | 1,08E-06 | 18,5 | 5,19E-07 | 37,1 | 8,39E-06 |
| ZCCHC10 | 2,1  | 0,0009   | 2,2  | 0,0075   | 2,9  | 0,0028   |
| ZNF296  | 3,5  | 0,0005   | 3,1  | 3,90E-05 | 2,4  | 0,0089   |
| ZPR1    | 2,2  | 0,0131   | 2,6  | 0,0057   | 2,1  | 0,0398   |

**up in VS versus  
SC**

| Gene name  | FC vs -/- | raw P value | FC -<br>/CD271+ | raw P value | FC vs<br>MSCA1+ | raw P value |
|------------|-----------|-------------|-----------------|-------------|-----------------|-------------|
| ACSS1      | 4,1       | 0,003       | 4,3             | 0,0008      | 7,3             | 0,001       |
| ACTR3C     | 2,8       | 0,0394      | 6,6             | 0,0002      | 11,6            | 0,0011      |
| ADAMTSL3   | 4,6       | 0,0025      | 4,3             | 7,91E-06    | 6,6             | 9,18E-05    |
| ADCY6      | 2,3       | 0,0002      | 2,4             | 0,0002      | 2,5             | 0,0002      |
| ADH1B      | 2,0       | 0,0253      | 4,2             | 0,0053      | 3,0             | 0,0228      |
| ADORA1     | 5,0       | 0,006       | 5,7             | 0,0123      | 9,0             | 6,32E-05    |
| AGTR2      | 2,5       | 0,0056      | 21,6            | 0,0002      | 18,5            | 0,0021      |
| ALDH1A2    | 72,4      | 0,0002      | 87,8            | 1,14E-05    | 19,1            | 0,0114      |
| ALDH1L1    | 9,2       | 0,0096      | 7,1             | 5,28E-05    | 7,1             | 4,28E-06    |
| ALDH5A1    | 2,5       | 0,0327      | 2,0             | 0,0251      | 3,5             | 0,0076      |
| ALOX15     | 1579,1    | 9,00E-06    | 425,3           | 5,54E-08    | 38,5            | 0,0116      |
| ANGPTL7    | 178,9     | 8,36E-06    | 12,2            | 9,91E-05    | 11,8            | 0,0098      |
| ANKRD29    | 6,4       | 0,0007      | 2,1             | 0,038       | 5,3             | 0,0008      |
| ANKRD46    | 3,5       | 0,0382      | 3,5             | 0,0107      | 4,5             | 0,0127      |
| ANXA8      | 1923,0    | 7,83E-06    | 434,1           | 1,39E-07    | 43,6            | 0,0111      |
| ANXA8L1    | 971,2     | 1,78E-05    | 195,5           | 9,77E-06    | 33,2            | 0,0089      |
| ANXA9      | 97,8      | 2,02E-05    | 23,0            | 2,25E-05    | 2,8             | 0,0296      |
| AP1M2      | 18,0      | 4,92E-05    | 2,2             | 0,0495      | 2,2             | 0,0175      |
| ARHGEF28   | 43,3      | 6,49E-05    | 10,1            | 0,0065      | 27,6            | 0,0002      |
| ARID5B     | 3,7       | 0,0163      | 4,4             | 0,0038      | 4,2             | 0,0023      |
| ARNT2      | 10,0      | 0,0012      | 4,4             | 0,0003      | 4,5             | 0,0037      |
| ARRDC1-AS1 | 3,8       | 0,0035      | 2,3             | 0,0018      | 4,1             | 0,0154      |
| ART4       | 4,7       | 0,0251      | 24,4            | 0,0009      | 71,0            | 6,76E-05    |
| ASTN1      | 63,6      | 0,0002      | 21,9            | 0,0003      | 13,0            | 0,0008      |
| ASTN2      | 4,0       | 0,0008      | 3,9             | 0,0117      | 13,7            | 0,002       |

|            |       |          |       |          |       |          |
|------------|-------|----------|-------|----------|-------|----------|
| ATP1B1     | 7,8   | 0,0004   | 4,5   | 0,0002   | 5,7   | 3,03E-05 |
| BARX1      | 194,9 | 2,61E-07 | 329,4 | 1,60E-07 | 251,2 | 0,0002   |
| BCAR3      | 5,5   | 0,0169   | 3,1   | 0,0104   | 2,7   | 0,0455   |
| BCHE       | 7,2   | 0,0043   | 4,7   | 0,002    | 3,7   | 0,0152   |
| BICDL1     | 69,8  | 2,20E-05 | 8,5   | 0,0003   | 4,4   | 0,0459   |
| BST2       | 2,7   | 0,0098   | 2,7   | 0,0055   | 3,0   | 0,0211   |
| BTBD8      | 2,5   | 0,0299   | 7,0   | 0,0004   | 7,3   | 0,0093   |
| C17orf107  | 3,1   | 0,0292   | 3,3   | 0,0148   | 3,3   | 0,0101   |
| C4A        | 88,3  | 8,11E-05 | 7,4   | 0,0019   | 5,7   | 0,0003   |
| CACNA1H    | 14,6  | 0,0009   | 2,4   | 0,0324   | 2,7   | 0,0002   |
| CAND2      | 3,2   | 0,0045   | 2,1   | 0,0074   | 2,3   | 0,0482   |
| CATSPERB   | 12,2  | 0,0027   | 9,8   | 0,0003   | 9,0   | 0,0031   |
| CAVIN2     | 22,8  | 0,0118   | 8,5   | 0,032    | 8,0   | 0,0075   |
| CBLN4      | 33,2  | 0,0002   | 296,6 | 3,41E-07 | 227,9 | 1,31E-05 |
| CBX1       | 3,0   | 0,0006   | 2,2   | 0,0398   | 2,2   | 0,02     |
| CCDC102B   | 2,6   | 0,0032   | 4,2   | 0,0045   | 9,7   | 0,0004   |
| CCDC68     | 7,6   | 0,0226   | 4,3   | 0,0225   | 5,6   | 0,0034   |
| CCL11      | 11,8  | 0,0061   | 60,2  | 5,73E-06 | 283,8 | 6,38E-07 |
| CD4        | 4,7   | 0,0057   | 4,2   | 0,0149   | 10,0  | 8,67E-05 |
| CDCA7L     | 4,7   | 0,0084   | 2,7   | 0,003    | 2,8   | 0,0046   |
| CDH4       | 9,3   | 9,99E-05 | 7,6   | 0,0004   | 4,2   | 0,0214   |
| CDIP1      | 2,8   | 0,001    | 2,5   | 0,0019   | 2,8   | 0,0017   |
| CDK18      | 14,3  | 0,0005   | 6,5   | 0,0052   | 7,8   | 0,0017   |
| CDK20      | 2,6   | 0,0088   | 3,1   | 0,0363   | 2,3   | 0,0325   |
| CELSR2     | 4,6   | 0,0116   | 3,7   | 0,0157   | 3,4   | 0,0452   |
| CERS6      | 3,7   | 0,0061   | 3,2   | 0,0017   | 3,4   | 0,0041   |
| CETN3      | 2,6   | 0,0105   | 2,4   | 0,0247   | 3,0   | 0,0055   |
| CFI        | 40,8  | 2,55E-06 | 16,8  | 4,66E-06 | 19,9  | 1,51E-05 |
| CHN2       | 4,8   | 0,0015   | 4,9   | 0,0014   | 6,3   | 0,0185   |
| CITED4     | 3,8   | 0,0008   | 3,2   | 0,002    | 2,6   | 0,0301   |
| CLDN1      | 654,1 | 1,91E-06 | 5,3   | 0,0036   | 27,6  | 0,0105   |
| CLDN11     | 2,5   | 0,0104   | 6,5   | 1,02E-05 | 3,1   | 2,04E-05 |
| CLDN15     | 48,7  | 2,27E-05 | 6,1   | 2,12E-06 | 2,9   | 0,0282   |
| CNN1       | 11,9  | 0,0023   | 10,6  | 0,0005   | 15,8  | 0,0059   |
| COL4A6     | 3,1   | 0,0479   | 3,0   | 0,0071   | 2,7   | 0,0489   |
| COL9A3     | 26,1  | 0,0014   | 4,1   | 0,0086   | 9,6   | 0,0007   |
| COLGALT2   | 3,4   | 0,0022   | 5,2   | 2,43E-05 | 6,0   | 0,0003   |
| CPNE5      | 15,6  | 0,0003   | 3,9   | 0,0066   | 6,7   | 7,95E-05 |
| CPT1C      | 8,6   | 5,50E-07 | 3,6   | 0,0013   | 5,1   | 0,0002   |
| CSDC2      | 53,2  | 2,80E-05 | 27,5  | 0,0003   | 13,6  | 0,0056   |
| CSGALNACT1 | 4,2   | 0,0213   | 3,1   | 0,0049   | 6,3   | 0,0055   |
| CSRP1      | 2,3   | 0,0016   | 2,9   | 0,0002   | 3,0   | 4,60E-05 |
| CTNNA2     | 30,6  | 6,02E-05 | 8,6   | 0,0005   | 4,6   | 0,0422   |
| CTTNBP2    | 2,1   | 0,0064   | 2,5   | 0,0003   | 2,7   | 0,0286   |
| CXCL13     | 14,8  | 7,93E-05 | 8,4   | 0,0056   | 5,5   | 0,0071   |

|           |       |          |      |          |       |          |
|-----------|-------|----------|------|----------|-------|----------|
| DAPK1     | 13,7  | 0,0005   | 3,1  | 0,0035   | 3,3   | 0,0055   |
| DBNDD1    | 14,4  | 0,0002   | 17,1 | 0,0006   | 12,4  | 0,0004   |
| DDR1      | 6,6   | 0,0002   | 3,1  | 0,0062   | 3,4   | 0,0021   |
| DDX60     | 4,5   | 0,0004   | 3,0  | 0,007    | 2,8   | 0,0012   |
| DES       | 135,5 | 3,46E-05 | 30,7 | 0,0006   | 35,3  | 0,021    |
| DNAJB1    | 3,2   | 0,0007   | 6,9  | 6,01E-06 | 4,1   | 0,0054   |
| DNAJC12   | 5,0   | 0,0126   | 2,6  | 0,014    | 4,1   | 0,0076   |
| DOCK4     | 3,9   | 0,0031   | 5,0  | 0,0005   | 2,5   | 0,0147   |
| DOCK5     | 9,3   | 0,0014   | 8,1  | 4,28E-05 | 5,2   | 0,0003   |
| DPYS      | 22,0  | 0,0003   | 18,6 | 7,36E-05 | 18,4  | 0,0005   |
| DSC3      | 41,5  | 0,0001   | 7,8  | 0,0008   | 3,4   | 0,0158   |
| DTX3      | 3,1   | 0,0004   | 2,7  | 0,0007   | 2,6   | 0,0014   |
| DUS4L     | 2,2   | 0,021    | 2,2  | 0,0259   | 2,2   | 0,0185   |
| EDN1      | 2,9   | 0,0384   | 2,6  | 0,0454   | 5,3   | 0,0042   |
| EGFL6     | 176,1 | 0,0006   | 26,4 | 0,0026   | 5,9   | 0,011    |
| EIF4A2    | 2,1   | 0,0011   | 2,2  | 0,0007   | 2,5   | 3,76E-05 |
| ELL3      | 2,1   | 0,02     | 3,7  | 0,0147   | 4,1   | 0,0097   |
| EMB       | 164,2 | 1,02E-07 | 9,1  | 0,0002   | 4,0   | 0,0431   |
| EPHA2     | 4,7   | 0,0036   | 3,1  | 0,0023   | 2,6   | 0,014    |
| EPYC      | 7,8   | 0,0109   | 24,1 | 0,0005   | 20,7  | 0,0015   |
| ERBB4     | 39,5  | 4,63E-05 | 5,2  | 0,0083   | 3,8   | 0,0447   |
| ESR1      | 3,0   | 0,0032   | 5,4  | 0,0002   | 6,9   | 0,0008   |
| EYA2      | 5,6   | 0,0183   | 25,7 | 0,0002   | 8,8   | 0,0001   |
| FADS2     | 5,4   | 0,0017   | 4,1  | 0,0018   | 4,9   | 0,0038   |
| FAIM2     | 3,1   | 0,001    | 2,1  | 0,0359   | 2,5   | 0,0286   |
| FAM131B   | 3,7   | 0,0005   | 4,7  | 7,03E-05 | 8,0   | 0,0121   |
| FAM153C   | 102,2 | 3,63E-05 | 16,2 | 0,0027   | 4,9   | 0,0433   |
| FAN1      | 2,1   | 0,0194   | 2,7  | 0,0093   | 2,6   | 0,0356   |
| FAT3      | 17,3  | 3,06E-06 | 4,4  | 0,0024   | 7,9   | 0,0003   |
| FBP1      | 10,7  | 0,0001   | 4,1  | 0,0348   | 5,5   | 0,001    |
| FLNC      | 4,3   | 0,0001   | 2,2  | 0,0053   | 2,4   | 0,0437   |
| FLRT3     | 24,4  | 0,0002   | 18,7 | 3,97E-06 | 4,1   | 0,0224   |
| FMN2      | 25,2  | 0,0003   | 4,9  | 0,0175   | 22,2  | 0,0006   |
| FNTB      | 4,3   | 0,0005   | 2,9  | 0,0098   | 3,5   | 0,0083   |
| GALNT14   | 39,8  | 0,0006   | 9,5  | 0,0014   | 6,3   | 0,0063   |
| GATA5     | 24,3  | 0,0003   | 4,2  | 0,0261   | 4,2   | 0,0075   |
| GATA6     | 3,1   | 0,0026   | 2,4  | 0,01     | 4,0   | 0,0046   |
| GNA14     | 3,6   | 0,0084   | 4,9  | 0,0016   | 11,7  | 0,0001   |
| GNG4      | 2,7   | 0,0018   | 4,4  | 0,0011   | 8,1   | 0,0004   |
| GPRASP2   | 3,0   | 0,0049   | 2,6  | 0,005    | 3,7   | 0,0003   |
| GREM1     | 6,8   | 0,0158   | 27,3 | 0,0002   | 150,0 | 2,23E-05 |
| HAND2-AS1 | 3,9   | 0,002    | 4,5  | 0,0023   | 3,4   | 0,002    |
| HBA1      | 3,8   | 0,0012   | 5,9  | 0,0002   | 4,4   | 0,001    |
| HBA2      | 5,5   | 0,0051   | 10,5 | 0,0002   | 6,4   | 0,0009   |
| HBB       | 9,3   | 0,0055   | 13,9 | 1,21E-05 | 9,9   | 0,0038   |



|             |        |          |       |          |       |          |
|-------------|--------|----------|-------|----------|-------|----------|
| HBEGF       | 3,1    | 0,0049   | 2,7   | 0,004    | 2,1   | 0,0072   |
| HEPACAM     | 32,4   | 6,72E-05 | 5,0   | 0,0001   | 3,3   | 0,002    |
| HERC4       | 2,1    | 0,0002   | 2,3   | 0,0006   | 2,0   | 0,0057   |
| HINT3       | 3,2    | 6,04E-05 | 3,1   | 4,56E-05 | 2,3   | 0,0054   |
| HLTF        | 2,6    | 0,0011   | 2,3   | 0,0219   | 2,0   | 0,0498   |
| HMGCL       | 2,8    | 0,0075   | 3,4   | 0,008    | 2,4   | 0,0137   |
| HOOK1       | 29,2   | 7,25E-06 | 5,5   | 0,0024   | 2,4   | 0,0082   |
| HOTS        | 3,4    | 0,0025   | 4,3   | 0,0015   | 4,8   | 0,0008   |
| HOXA3       | 4,2    | 0,0005   | 2,8   | 0,0366   | 4,1   | 0,0067   |
| HOXA4       | 15,0   | 0,0003   | 6,2   | 0,0095   | 7,5   | 0,0069   |
| HOXB9       | 2,6    | 0,0077   | 5,5   | 0,0059   | 7,4   | 0,0032   |
| HS3ST1      | 45,0   | 0,0001   | 8,7   | 0,0011   | 4,3   | 0,0497   |
| HSF4        | 2,6    | 0,0182   | 5,0   | 5,86E-06 | 2,9   | 0,0055   |
| HSPA1A      | 3,0    | 0,004    | 4,9   | 7,22E-05 | 5,1   | 4,03E-05 |
| HSPA1B      | 4,2    | 0,0034   | 4,7   | 0,0006   | 4,5   | 0,0008   |
| HSPA6       | 8,5    | 0,0059   | 20,7  | 0,0015   | 15,0  | 0,0013   |
| HSPA7       | 17,2   | 0,0006   | 18,6  | 0,0006   | 18,5  | 0,0006   |
| IGFBP2      | 36,6   | 0,0003   | 29,0  | 1,45E-05 | 59,8  | 3,29E-05 |
| IKZF4       | 2,9    | 0,0087   | 3,4   | 0,0041   | 3,5   | 7,63E-05 |
| IL20        | 22,6   | 3,37E-05 | 5,3   | 0,0078   | 4,8   | 0,0227   |
| INMT        | 13,0   | 0,0002   | 6,4   | 0,0009   | 12,1  | 0,0011   |
| INMT-MINDY4 | 8,9    | 0,0003   | 3,9   | 0,0023   | 29,9  | 0,0023   |
| IPP         | 2,2    | 0,0018   | 2,6   | 0,0067   | 2,5   | 0,0191   |
| ISL1        | 69,4   | 3,63E-06 | 71,6  | 1,03E-07 | 30,1  | 0,0005   |
| ITLN1       | 2911,3 | 7,15E-06 | 900,8 | 1,20E-06 | 124,2 | 0,0085   |
| JAKMIP2     | 5,0    | 0,0021   | 31,1  | 0,0005   | 11,1  | 0,0044   |
| JPH2        | 25,2   | 0,0049   | 7,0   | 0,0015   | 3,4   | 0,0404   |
| JPH4        | 14,9   | 0,0018   | 6,8   | 0,0138   | 6,1   | 0,0007   |
| KANK4       | 27,6   | 0,0003   | 85,0  | 3,82E-05 | 103,3 | 4,62E-05 |
| KCNB1       | 14,8   | 0,0006   | 9,5   | 0,0006   | 4,0   | 0,0384   |
| KCND1       | 2,3    | 0,0167   | 3,3   | 0,0039   | 3,2   | 0,0013   |
| KCNN3       | 18,0   | 9,24E-06 | 39,4  | 4,43E-05 | 17,6  | 0,001    |
| KCTD16      | 4,0    | 0,0034   | 7,9   | 0,0033   | 14,1  | 0,0001   |
| KDM2B       | 3,2    | 0,0142   | 3,1   | 0,0451   | 3,2   | 0,0072   |
| KIAA0319L   | 2,6    | 0,0012   | 2,5   | 0,0153   | 2,2   | 0,0409   |
| KIAA1211    | 18,7   | 0,0003   | 8,0   | 0,0016   | 11,4  | 0,0012   |
| KIAA1755    | 2,7    | 0,0141   | 4,2   | 0,0034   | 4,3   | 0,0091   |
| KLK11       | 652,1  | 2,71E-06 | 98,5  | 2,95E-07 | 17,7  | 0,0156   |
| KLK5        | 275,4  | 3,71E-05 | 31,5  | 0,0001   | 7,4   | 0,0393   |
| KLK8        | 15,8   | 0,0001   | 2,6   | 0,0269   | 2,0   | 0,0413   |
| KNDC1       | 22,4   | 0,0002   | 3,4   | 0,0346   | 5,0   | 0,0021   |
| KRT18       | 1417,5 | 1,87E-05 | 179,7 | 4,96E-05 | 69,2  | 0,0047   |
| KRT19       | 1543,6 | 1,36E-05 | 296,9 | 3,19E-06 | 49,8  | 0,0115   |
| KRT222      | 6,0    | 0,0257   | 4,9   | 0,0089   | 8,0   | 0,0289   |
| KRT5        | 614,4  | 5,44E-07 | 77,1  | 7,80E-05 | 15,4  | 0,0159   |

|           |        |          |       |          |      |          |
|-----------|--------|----------|-------|----------|------|----------|
| KRT8      | 725,9  | 7,90E-06 | 116,4 | 1,47E-05 | 28,9 | 0,0042   |
| LAMB1     | 2,2    | 0,0075   | 3,3   | 4,80E-05 | 4,6  | 3,28E-05 |
| LAMP5     | 5,9    | 0,0186   | 27,9  | 0,0012   | 33,7 | 0,0089   |
| LDLRAP1   | 2,1    | 0,0103   | 2,5   | 0,0043   | 3,2  | 0,0009   |
| LGALS2    | 88,8   | 3,75E-05 | 10,2  | 0,003    | 5,5  | 0,0009   |
| LIMS3-    |        |          |       |          |      |          |
| LOC440895 | 9,5    | 0,0127   | 4,9   | 8,67E-05 | 3,8  | 0,0098   |
| LINC00665 | 8,2    | 0,0012   | 2,3   | 0,0109   | 2,2  | 0,0217   |
| LINC01018 | 70,5   | 1,57E-05 | 11,2  | 5,18E-06 | 5,9  | 0,0033   |
| LINC01096 | 8,4    | 0,019    | 7,5   | 0,0088   | 23,9 | 0,0002   |
| LINC01638 | 4,2    | 0,0045   | 2,9   | 0,0045   | 6,8  | 0,0001   |
| LOC642852 | 4,4    | 0,0039   | 3,3   | 0,0007   | 8,5  | 0,0068   |
| LOC728392 | 6,1    | 0,0002   | 2,4   | 2,75E-05 | 3,7  | 0,001    |
| LRCH4     | 2,6    | 0,0075   | 2,1   | 0,0141   | 2,4  | 0,0108   |
| LRFN5     | 2,5    | 0,0475   | 3,9   | 0,0036   | 3,7  | 0,0036   |
| LRRN4     | 514,6  | 4,82E-06 | 96,0  | 1,40E-06 | 10,4 | 0,0348   |
| LRSAM1    | 2,2    | 0,0411   | 3,0   | 0,0128   | 2,5  | 0,0016   |
| LTBP1     | 8,9    | 0,0059   | 9,8   | 0,0006   | 3,3  | 0,0328   |
| MALL      | 2,5    | 0,0218   | 3,7   | 0,0028   | 4,8  | 0,0012   |
| MAP6      | 8,8    | 0,0007   | 2,1   | 0,0224   | 3,3  | 0,008    |
| MAPK12    | 9,1    | 0,0189   | 5,4   | 0,0004   | 11,6 | 0,0003   |
| MAST3     | 3,6    | 0,0008   | 2,8   | 0,0118   | 4,5  | 0,0018   |
| MAST4     | 3,5    | 0,0023   | 2,6   | 0,0045   | 2,2  | 0,0316   |
| MDFI      | 4,7    | 0,0068   | 18,0  | 5,56E-05 | 60,0 | 3,15E-05 |
| MEIS1     | 3,3    | 0,0066   | 4,0   | 0,0006   | 3,5  | 0,0016   |
| MMP23A    | 2,6    | 0,0192   | 2,2   | 0,0144   | 3,4  | 0,0089   |
| MORN1     | 2,2    | 0,0167   | 2,2   | 0,0092   | 2,5  | 0,0027   |
| MOV10     | 2,1    | 0,0016   | 2,1   | 0,0001   | 2,0  | 0,0089   |
| MSLN      | 1701,4 | 1,71E-06 | 339,9 | 2,00E-07 | 51,7 | 0,0092   |
| MST1R     | 6,7    | 0,0046   | 2,6   | 0,0293   | 2,7  | 0,0135   |
| MT1B      | 10,4   | 0,014    | 6,2   | 0,0198   | 5,1  | 0,0445   |
| MT1E      | 5,9    | 0,0022   | 5,8   | 0,006    | 4,9  | 0,0063   |
| MT1G      | 27,8   | 0,006    | 17,7  | 0,0038   | 12,2 | 0,0128   |
| MT1H      | 15,5   | 0,0177   | 11,3  | 0,0148   | 8,6  | 0,0188   |
| MT1JP     | 3,0    | 0,0291   | 6,1   | 0,001    | 4,0  | 0,0095   |
| MT1L      | 4,2    | 0,0125   | 3,0   | 0,0086   | 4,5  | 0,0009   |
| MYRF      | 168,1  | 1,50E-05 | 18,9  | 8,38E-05 | 14,2 | 0,0015   |
| NAPEPLD   | 4,1    | 0,001    | 2,7   | 0,028    | 2,3  | 0,0169   |
| NAV2      | 6,1    | 0,0002   | 11,5  | 5,59E-05 | 29,5 | 0,0002   |
| NBAS      | 2,3    | 0,0005   | 2,1   | 0,0007   | 2,1  | 1,90E-06 |
| NBEA      | 5,8    | 0,001    | 3,6   | 0,0003   | 3,5  | 0,0032   |
| NDC80     | 5,9    | 0,0024   | 7,3   | 0,001    | 10,7 | 0,0014   |
| NECAB1    | 11,8   | 0,0004   | 45,8  | 0,0004   | 20,7 | 0,0002   |
| NECTIN2   | 4,4    | 0,0005   | 2,6   | 0,0009   | 2,3  | 0,0022   |
| NELL1     | 43,8   | 4,86E-05 | 9,0   | 0,0017   | 10,3 | 0,0092   |

|            |       |          |      |          |       |          |
|------------|-------|----------|------|----------|-------|----------|
| NFASC      | 6,6   | 0,0146   | 69,3 | 5,31E-07 | 116,6 | 2,20E-08 |
| NKX3-2     | 16,7  | 0,0008   | 26,0 | 5,80E-05 | 32,5  | 3,36E-05 |
| NOL3       | 2,2   | 0,0251   | 3,3  | 0,0045   | 6,7   | 0,0002   |
| NPNT       | 79,0  | 0,0001   | 92,6 | 7,00E-05 | 146,1 | 0,0003   |
| NPTXR      | 6,4   | 0,0001   | 5,1  | 1,85E-05 | 6,2   | 0,0135   |
| NR2F1      | 14,8  | 0,0002   | 32,2 | 4,58E-06 | 21,9  | 9,00E-06 |
| NR2F1-AS1  | 6,4   | 0,0009   | 5,5  | 0,0033   | 2,7   | 0,0259   |
| NRARP      | 5,3   | 0,0056   | 4,1  | 0,0042   | 5,7   | 0,0005   |
| NRK        | 8,6   | 0,0003   | 5,1  | 0,0017   | 27,2  | 0,0007   |
| NSG1       | 302,5 | 3,35E-06 | 19,8 | 6,20E-05 | 8,2   | 0,0274   |
| NTNG1      | 3,6   | 0,0053   | 4,3  | 0,0007   | 4,4   | 0,0095   |
| NYNRIN     | 3,7   | 0,0045   | 3,5  | 0,0148   | 4,0   | 0,0033   |
| OLR1       | 30,3  | 0,0006   | 8,8  | 0,003    | 4,6   | 0,032    |
| P2RX2      | 15,6  | 0,0005   | 2,6  | 0,0004   | 2,3   | 0,0099   |
| P3H2       | 5,2   | 2,99E-05 | 22,1 | 2,27E-06 | 29,9  | 7,18E-05 |
| PAR6B      | 51,8  | 8,36E-05 | 17,6 | 0,0001   | 6,0   | 0,0154   |
| PBX1       | 2,1   | 0,0022   | 2,5  | 0,0019   | 2,2   | 0,0091   |
| PCDHAC2    | 45,7  | 0,0002   | 6,9  | 0,0028   | 5,7   | 0,006    |
| PCK1       | 12,5  | 0,0016   | 12,3 | 0,0001   | 8,4   | 0,0059   |
| PDE1A      | 3,8   | 0,0239   | 4,7  | 0,0006   | 2,2   | 0,0104   |
| PDE9A      | 2,4   | 0,0306   | 2,4  | 0,002    | 2,7   | 0,0115   |
| PDLIM2     | 28,1  | 0,0005   | 4,7  | 0,0058   | 23,9  | 0,0001   |
| PDZK1IP1   | 160,8 | 2,85E-05 | 14,7 | 1,10E-05 | 7,6   | 0,0159   |
| PGM5P3-AS1 | 3,0   | 0,0469   | 6,7  | 0,0014   | 9,1   | 0,0046   |
| PIK3CD     | 6,3   | 0,0009   | 3,9  | 0,0049   | 3,2   | 0,0027   |
| PLA2G4A    | 2,4   | 0,0039   | 2,5  | 0,0001   | 2,5   | 0,0017   |
| PLAT       | 7,4   | 0,0006   | 10,1 | 0,0001   | 20,8  | 4,43E-05 |
| PLCB4      | 6,7   | 0,0437   | 36,8 | 0,0012   | 40,2  | 2,24E-05 |
| PLEKHA2    | 3,8   | 0,0033   | 4,5  | 0,0007   | 3,6   | 0,0025   |
| PLEKHA6    | 2,4   | 0,0137   | 2,4  | 0,0329   | 3,8   | 0,0203   |
| PLEKHG3    | 6,6   | 0,0008   | 4,1  | 0,0016   | 3,6   | 0,012    |
| POLR3G     | 3,6   | 0,0121   | 3,1  | 0,0002   | 2,4   | 0,0061   |
| PON3       | 2,4   | 0,0113   | 3,7  | 0,0002   | 3,8   | 0,0034   |
| PPFIA3     | 4,2   | 0,0093   | 2,9  | 0,022    | 5,2   | 0,0062   |
| PPP1R9A    | 4,5   | 0,0095   | 10,0 | 5,51E-05 | 8,2   | 0,0001   |
| PREX1      | 4,3   | 0,0208   | 3,2  | 0,0194   | 4,8   | 0,0002   |
| PRKG1      | 2,2   | 0,0095   | 2,2  | 0,0006   | 2,1   | 2,19E-05 |
| PTN        | 8,7   | 5,11E-05 | 55,5 | 5,92E-07 | 48,9  | 1,61E-06 |
| PTPRQ      | 19,2  | 0,0003   | 7,1  | 0,0028   | 7,1   | 0,0016   |
| QPRT       | 20,2  | 0,0003   | 5,9  | 0,0004   | 17,1  | 2,30E-06 |
| RAB11FIP4  | 5,8   | 0,0024   | 2,3  | 0,0003   | 2,7   | 0,0133   |
| RAMP1      | 41,8  | 5,94E-05 | 12,3 | 0,0017   | 26,3  | 0,0001   |
| RAPGEF3    | 4,9   | 0,0148   | 5,1  | 0,0026   | 7,4   | 3,69E-05 |
| RARB       | 9,8   | 0,0003   | 6,5  | 0,0013   | 5,5   | 0,0217   |
| RARRES1    | 23,5  | 9,74E-06 | 11,6 | 3,24E-05 | 3,5   | 0,0347   |

|             |       |          |      |          |      |          |
|-------------|-------|----------|------|----------|------|----------|
| RBP1        | 5,5   | 0,0056   | 7,2  | 0,0004   | 6,4  | 0,0001   |
| RDH10       | 2,1   | 0,0417   | 2,7  | 0,0056   | 2,7  | 0,001    |
| REC8        | 18,1  | 0,001    | 4,4  | 0,0009   | 4,4  | 0,0242   |
| RGL1        | 2,7   | 0,0047   | 2,5  | 0,0067   | 2,0  | 0,0395   |
| RIMBP2      | 3,7   | 0,0084   | 4,2  | 0,0018   | 4,6  | 0,0144   |
| RIMS1       | 15,1  | 0,0015   | 9,1  | 5,45E-06 | 20,6 | 0,0014   |
| RIPK4       | 166,8 | 7,18E-06 | 17,4 | 5,08E-05 | 5,5  | 0,0414   |
| RNF150      | 3,5   | 0,0314   | 8,5  | 0,0002   | 10,3 | 1,95E-05 |
| RNF207      | 3,2   | 0,0012   | 3,6  | 0,0165   | 3,1  | 0,001    |
| RNF214      | 4,3   | 9,98E-05 | 2,9  | 0,0153   | 2,5  | 0,043    |
| ROR2        | 14,2  | 0,0001   | 8,1  | 0,0001   | 10,9 | 0,0001   |
| RSPO1       | 215,0 | 8,11E-06 | 19,0 | 0,0001   | 17,3 | 0,0021   |
| RTP4        | 6,1   | 0,0077   | 3,2  | 0,0254   | 2,8  | 0,0171   |
| SCG5        | 17,9  | 0,0002   | 2,5  | 0,0112   | 7,2  | 0,0023   |
| SCIN        | 4,1   | 0,0046   | 17,0 | 9,64E-05 | 22,8 | 0,0001   |
| SCN2B       | 3,1   | 0,027    | 4,3  | 0,0004   | 3,9  | 0,0124   |
| SCN7A       | 2,7   | 0,04     | 2,6  | 0,0167   | 5,7  | 0,0263   |
| SEMA3B      | 12,0  | 4,08E-05 | 35,1 | 3,45E-05 | 8,3  | 0,0022   |
| SEPSECS-AS1 | 3,2   | 0,0267   | 4,3  | 0,014    | 7,2  | 0,0004   |
| SEZ6L2      | 72,8  | 0,0004   | 8,6  | 0,0011   | 10,4 | 0,0137   |
| SFMBT2      | 2,4   | 0,0013   | 2,6  | 0,0017   | 2,1  | 0,0045   |
| SFRP2       | 2,1   | 0,0264   | 10,1 | 4,18E-05 | 8,2  | 0,0004   |
| SGPP2       | 83,4  | 2,19E-05 | 10,8 | 0,0013   | 4,9  | 0,0114   |
| SH3GL3      | 4,9   | 0,0017   | 2,3  | 0,0248   | 6,7  | 0,0003   |
| SKINT1L     | 7,6   | 0,0037   | 4,0  | 0,0011   | 3,7  | 0,0099   |
| SLC16A14    | 2,6   | 0,0438   | 6,1  | 0,0004   | 4,1  | 0,0003   |
| SLC16A4     | 4,2   | 0,0051   | 2,1  | 0,0064   | 3,0  | 0,0065   |
| SLC16A9     | 5,0   | 0,0229   | 3,3  | 0,0427   | 8,9  | 0,0024   |
| SLC24A3     | 3,4   | 0,0012   | 7,1  | 1,01E-08 | 5,2  | 3,34E-06 |
| SLC30A1     | 4,2   | 0,041    | 7,2  | 0,0142   | 6,0  | 0,0176   |
| SLC45A3     | 3,7   | 0,0279   | 3,5  | 0,0281   | 7,2  | 0,0098   |
| SLC4A11     | 6,7   | 0,0015   | 45,4 | 3,41E-06 | 50,7 | 2,87E-07 |
| SMIM1       | 2,7   | 0,0188   | 3,5  | 0,0101   | 4,9  | 0,0004   |
| SMTNL2      | 19,8  | 0,0023   | 12,9 | 0,0001   | 5,8  | 0,0341   |
| SORL1       | 5,4   | 0,002    | 2,9  | 0,0457   | 7,8  | 0,0005   |
| SOX6        | 46,9  | 2,81E-05 | 9,8  | 0,0029   | 4,9  | 0,0363   |
| SPARCL1     | 6,3   | 0,0036   | 6,6  | 3,74E-06 | 12,4 | 4,40E-05 |
| SPEG        | 23,0  | 0,0002   | 6,2  | 0,001    | 4,4  | 0,0477   |
| SPON1       | 7,2   | 0,0072   | 3,3  | 0,0013   | 7,5  | 0,0002   |
| SRGAP2      | 2,0   | 0,0187   | 2,5  | 0,0109   | 5,0  | 0,0277   |
| ST6GAL2     | 5,4   | 0,0092   | 3,7  | 0,0078   | 4,2  | 0,0135   |
| ST6GALNAC5  | 14,7  | 0,0077   | 15,3 | 0,0008   | 10,6 | 0,0463   |
| STAMBPL1    | 2,5   | 0,0005   | 2,9  | 3,64E-05 | 2,1  | 0,0276   |
| STK36       | 2,5   | 0,0337   | 2,4  | 0,0234   | 2,3  | 0,0369   |
| SULT1C4     | 8,9   | 0,0015   | 49,8 | 1,54E-05 | 84,0 | 1,29E-06 |

|           |       |          |       |          |       |          |
|-----------|-------|----------|-------|----------|-------|----------|
| SUSD3     | 11,7  | 0,0039   | 6,7   | 0,0152   | 3,9   | 0,0065   |
| SYNPO2    | 10,1  | 0,0008   | 5,9   | 0,0008   | 10,4  | 0,0041   |
| SYT4      | 231,2 | 2,91E-08 | 14,9  | 0,0002   | 5,2   | 0,0222   |
| SYTL4     | 2,2   | 0,0005   | 2,4   | 0,0053   | 3,2   | 0,0247   |
| TACR3     | 6,7   | 0,009    | 3,6   | 0,0229   | 4,7   | 0,0253   |
| TC2N      | 3,3   | 0,0285   | 3,7   | 0,0114   | 3,5   | 0,0106   |
| TCF21     | 91,4  | 1,29E-05 | 207,3 | 9,00E-07 | 50,4  | 7,78E-05 |
| TFPI2     | 3,9   | 0,0134   | 2,0   | 0,0147   | 2,9   | 0,0011   |
| TGM1      | 381,1 | 2,36E-05 | 43,9  | 1,36E-05 | 10,4  | 0,0364   |
| TGM2      | 50,6  | 0,0005   | 9,6   | 0,0042   | 5,6   | 0,0293   |
| THAP2     | 3,2   | 0,0028   | 2,2   | 0,0238   | 2,0   | 0,0006   |
| THSD4     | 18,0  | 5,07E-05 | 3,2   | 0,0073   | 4,3   | 0,0381   |
| TMEM132B  | 11,5  | 0,0006   | 4,2   | 0,0065   | 3,7   | 0,0031   |
| TMEM161B  | 2,6   | 0,0025   | 2,4   | 0,0069   | 2,0   | 0,0152   |
| TMEM246   | 12,0  | 0,0028   | 5,9   | 0,0215   | 9,8   | 0,0197   |
| TMOD2     | 2,5   | 0,0097   | 5,5   | 0,0001   | 4,4   | 0,0006   |
| TNFSF14   | 5,0   | 0,0058   | 3,1   | 0,0082   | 5,1   | 0,0451   |
| TNS3      | 4,2   | 0,0056   | 3,1   | 0,0006   | 4,0   | 0,0009   |
| TPD52L1   | 11,1  | 0,0004   | 3,5   | 0,0054   | 5,5   | 0,0008   |
| TRIM17    | 22,3  | 5,74E-05 | 7,2   | 0,0018   | 4,5   | 0,0244   |
| TRIM5     | 2,9   | 0,0004   | 2,4   | 0,0022   | 2,4   | 0,0004   |
| TRNP1     | 40,2  | 5,16E-05 | 3,6   | 0,0008   | 13,8  | 0,0002   |
| TST       | 11,6  | 0,0005   | 2,2   | 0,0242   | 2,2   | 0,0321   |
| TTLL7     | 2,4   | 0,0029   | 3,1   | 0,0003   | 2,3   | 0,0146   |
| TUBA4A    | 5,2   | 0,0002   | 4,8   | 1,21E-05 | 5,3   | 6,33E-05 |
| TVP23A    | 14,7  | 2,61E-05 | 11,6  | 7,33E-05 | 12,8  | 0,0003   |
| TXNIP     | 2,6   | 0,0049   | 3,1   | 0,0006   | 3,5   | 0,0077   |
| UBR2      | 2,4   | 0,0079   | 2,2   | 0,0105   | 2,1   | 0,0134   |
| UPK1B     | 350,3 | 2,26E-07 | 45,1  | 1,67E-05 | 7,2   | 0,0468   |
| UPK3B     | 686,0 | 4,57E-05 | 91,1  | 9,93E-05 | 12,0  | 0,019    |
| VIPR2     | 7,7   | 0,0006   | 3,1   | 0,0013   | 5,8   | 5,24E-05 |
| VSNL1     | 63,1  | 0,0001   | 14,3  | 0,006    | 10,3  | 0,0365   |
| WDR6      | 4,2   | 0,0021   | 2,7   | 0,004    | 2,8   | 0,0034   |
| WDR86     | 3,2   | 0,0204   | 15,4  | 0,0002   | 8,2   | 0,0001   |
| WDR86-AS1 | 20,1  | 0,0009   | 20,9  | 0,0002   | 5,7   | 0,013    |
| WNK2      | 2,6   | 0,0069   | 13,3  | 1,15E-05 | 9,0   | 0,0016   |
| WNK4      | 48,6  | 3,20E-05 | 19,5  | 5,20E-07 | 4,4   | 0,0249   |
| WNT5A     | 13,1  | 1,75E-05 | 7,3   | 0,0006   | 9,4   | 0,0012   |
| WT1       | 279,5 | 2,42E-08 | 206,9 | 1,75E-05 | 131,6 | 3,39E-05 |
| ZBTB46    | 2,5   | 0,027    | 2,2   | 0,0189   | 2,6   | 0,0134   |
| ZFHX2     | 2,6   | 0,0111   | 3,9   | 0,0121   | 4,4   | 0,0039   |
| ZNF185    | 15,7  | 7,20E-05 | 3,9   | 0,0001   | 2,3   | 0,0496   |
| ZNF204P   | 3,2   | 0,0029   | 2,6   | 0,0114   | 5,9   | 0,0097   |
| ZNF229    | 8,9   | 0,0002   | 4,0   | 0,0079   | 2,4   | 0,0451   |
| ZNF302    | 2,5   | 0,0427   | 3,4   | 0,0133   | 3,6   | 0,0149   |

|         |      |        |     |        |     |        |
|---------|------|--------|-----|--------|-----|--------|
| ZNF467  | 6,6  | 0,0018 | 4,0 | 0,0161 | 6,9 | 0,0023 |
| ZNF471  | 2,7  | 0,0115 | 3,1 | 0,0098 | 3,5 | 0,0024 |
| ZNF483  | 10,9 | 0,0002 | 5,4 | 0,0078 | 3,7 | 0,0381 |
| ZNF608  | 4,8  | 0,003  | 7,0 | 0,0001 | 7,3 | 0,0001 |
| ZNF70   | 2,5  | 0,01   | 2,0 | 0,004  | 2,6 | 0,0467 |
| ZNF75D  | 2,1  | 0,027  | 2,1 | 0,0298 | 2,7 | 0,0079 |
| ZNF775  | 3,1  | 0,0311 | 3,4 | 0,0233 | 4,1 | 0,0278 |
| ZSCAN31 | 5,0  | 0,0246 | 4,6 | 0,0307 | 4,0 | 0,0424 |

**Supplementary Table 4: list of transcripts specific for -/-, -/CD271+ and MSCA1+ subsets isolated from visceral AT**

Gene name followed by the fold change over indicated subset and raw P value

| <b>up in -/- from VS</b> |                |             |              |             |  |
|--------------------------|----------------|-------------|--------------|-------------|--|
| Gene name                | FC vs -/CD271+ | raw P value | FC vs MSCA1+ | raw P value |  |
| AADAC                    | 5,8            | 0,0016      | 14,0         | 5,70E-05    |  |
| AADACL2                  | 11,9           | 0,0187      | 29,7         | 0,0029      |  |
| ABCA3                    | 4,9            | 1,70E-05    | 9,3          | 4,96E-07    |  |
| ABCC6P1                  | 3,8            | 0,027       | 5,9          | 0,0055      |  |
| ABCG1                    | 6,8            | 0,0073      | 7,5          | 0,0054      |  |
| ABHD4                    | 2,3            | 0,0109      | 2,0          | 0,0275      |  |
| ABLIM1                   | 5,0            | 0,0001      | 10,0         | 3,18E-06    |  |
| ABRACL                   | 2,9            | 8,57E-05    | 3,3          | 3,40E-05    |  |
| ACE                      | 2,6            | 0,0476      | 2,7          | 0,0374      |  |
| ACKR2                    | 4,2            | 0,0062      | 3,3          | 0,0171      |  |
| ACOT11                   | 3,1            | 0,0259      | 4,9          | 0,004       |  |
| ACOT7                    | 2,2            | 0,0032      | 2,4          | 0,0015      |  |
| ACP6                     | 2,1            | 0,0113      | 2,5          | 0,0024      |  |
| ACSBG2                   | 5,2            | 0,0045      | 7,7          | 0,001       |  |
| ADAL                     | 2,6            | 0,0285      | 2,4          | 0,0426      |  |
| ADAM10                   | 2,4            | 3,92E-05    | 3,4          | 1,72E-06    |  |
| ADAM15                   | 2,4            | 0,0007      | 2,7          | 0,0002      |  |
| ADAMTS16                 | 3,7            | 0,0261      | 3,4          | 0,0352      |  |
| ADAMTS6                  | 7,7            | 0,0008      | 9,7          | 0,0004      |  |
| ADCY8                    | 12,3           | 0,0059      | 20,2         | 0,0018      |  |
| ADGRD1                   | 3,4            | 0,0005      | 5,7          | 2,30E-05    |  |
| ADGRG2                   | 18,2           | 0,0073      | 42,9         | 0,0013      |  |
| ADGRG6                   | 9,9            | 0,001       | 43,5         | 1,16E-05    |  |
| ADI1                     | 2,7            | 4,30E-06    | 2,4          | 1,49E-05    |  |
| ADIRF                    | 2,6            | 0,0191      | 4,1          | 0,0021      |  |
| AFAP1L2                  | 3,7            | 1,46E-05    | 7,1          | 2,32E-07    |  |
| AGTPBP1                  | 3,0            | 7,22E-06    | 3,4          | 2,80E-06    |  |
| AHNAK2                   | 2,3            | 0,0015      | 4,2          | 1,34E-05    |  |
| AIF1L                    | 8,0            | 0,009       | 9,8          | 0,0052      |  |
| AJUBA                    | 4,8            | 0,0313      | 4,5          | 0,0366      |  |
| AKAP6                    | 3,2            | 0,0408      | 3,8          | 0,0217      |  |
| ALCAM                    | 2,6            | 0,0214      | 3,6          | 0,0039      |  |
| ALDH3B1                  | 5,7            | 1,09E-05    | 6,6          | 4,75E-06    |  |
| ALDOA                    | 2,1            | 0,0456      | 2,6          | 0,0154      |  |
| ALOX15                   | 9,9            | 0,0008      | 30,7         | 2,54E-05    |  |
| AMACR                    | 2,8            | 0,0245      | 3,6          | 0,008       |  |
| AMHR2                    | 5,0            | 0,0335      | 10,7         | 0,0042      |  |
| AMIGO3                   | 2,4            | 0,0014      | 2,5          | 0,0012      |  |
| AMMECR1                  | 2,9            | 0,0144      | 3,0          | 0,0118      |  |
| ANGPTL7                  | 12,6           | 8,66E-05    | 16,3         | 3,49E-05    |  |
| ANKEF1                   | 4,8            | 0,0059      | 5,2          | 0,0041      |  |
| ANKRD30B                 | 6,9            | 0,0096      | 8,0          | 0,0061      |  |
| ANOS                     | 7,4            | 0,0036      | 17,1         | 0,0002      |  |
| ANOS1                    | 5,9            | 3,42E-06    | 6,8          | 1,63E-06    |  |

|              |      |          |      |          |
|--------------|------|----------|------|----------|
| ANXA2        | 2,1  | 0,0143   | 2,0  | 0,0191   |
| ANXA3        | 10,6 | 0,0018   | 39,6 | 4,30E-05 |
| ANXA8        | 10,1 | 0,0025   | 27,6 | 0,0001   |
| ANXA8L1      | 10,3 | 0,0023   | 23,0 | 0,0002   |
| ANXA9        | 5,3  | 0,0018   | 15,7 | 2,62E-05 |
| AOX1         | 2,7  | 0,0001   | 3,2  | 2,85E-05 |
| AP1G2        | 2,2  | 0,0121   | 2,7  | 0,0029   |
| AP1M2        | 7,2  | 0,0008   | 8,3  | 0,0005   |
| AP1S2        | 2,3  | 0,0034   | 2,1  | 0,0078   |
| AP1S3        | 4,8  | 0,0222   | 9,0  | 0,0033   |
| APLP1        | 4,8  | 0,0053   | 4,7  | 0,0057   |
| APOL2        | 3,2  | 0,0443   | 4,6  | 0,0119   |
| AQP1         | 5,3  | 0,0013   | 8,9  | 0,0001   |
| AQP9         | 9,0  | 0,0009   | 39,6 | 9,27E-06 |
| AREG         | 3,8  | 0,0204   | 4,4  | 0,0108   |
| ARFGF3       | 7,1  | 0,0028   | 20,9 | 8,41E-05 |
| ARHGAP28     | 4,3  | 0,01     | 2,8  | 0,0495   |
| ARHGAP29     | 3,6  | 0,0002   | 4,7  | 2,84E-05 |
| ARHGDI3      | 7,5  | 0,0036   | 4,4  | 0,0218   |
| ARHGFB3      | 5,4  | 0,0007   | 6,6  | 0,0003   |
| ARHGFB37     | 3,7  | 0,0428   | 9,9  | 0,0019   |
| ARL4C        | 4,5  | 0,0004   | 5,2  | 0,0002   |
| ARMC4        | 8,1  | 0,0003   | 9,6  | 0,0002   |
| ARRB2        | 2,8  | 0,0028   | 4,2  | 0,0003   |
| ASIC2        | 7,2  | 1,70E-05 | 6,5  | 2,84E-05 |
| ASPHD1       | 8,4  | 0,01     | 15,0 | 0,0021   |
| ATP13A2      | 2,4  | 0,021    | 2,2  | 0,032    |
| ATP7B        | 3,6  | 0,0053   | 6,7  | 0,0003   |
| ATP8A1       | 2,4  | 0,0061   | 3,8  | 0,0003   |
| ATRNL1       | 7,4  | 0,0004   | 37,8 | 1,49E-06 |
| AZGP1        | 2,7  | 0,0215   | 2,3  | 0,0423   |
| B3GALT1      | 2,6  | 0,0499   | 3,2  | 0,021    |
| B3GNT5       | 2,3  | 0,0096   | 2,1  | 0,0171   |
| B9D2         | 2,1  | 0,0072   | 2,1  | 0,0077   |
| BAIAP2L1     | 6,9  | 0,0013   | 14,1 | 9,56E-05 |
| BAMBI        | 2,7  | 0,0002   | 2,6  | 0,0004   |
| BANK1        | 3,4  | 0,0033   | 3,3  | 0,0038   |
| BARX2        | 7,5  | 0,041    | 22,6 | 0,0041   |
| BCAM         | 4,2  | 0,0091   | 7,7  | 0,0008   |
| BCAS1        | 5,7  | 0,0369   | 15,7 | 0,003    |
| BCAT1        | 2,4  | 0,0337   | 2,6  | 0,0233   |
| BCO2         | 3,7  | 0,0009   | 5,5  | 8,44E-05 |
| BEX1         | 3,7  | 0,0388   | 5,8  | 0,0085   |
| BEX2         | 4,9  | 0,001    | 5,8  | 0,0005   |
| BICDL1       | 10,4 | 0,0004   | 17,7 | 7,00E-05 |
| BIRC3        | 3,3  | 0,0188   | 5,4  | 0,0025   |
| BLOC1S1-RDH5 | 3,5  | 0,0026   | 3,5  | 0,0027   |
| BMP3         | 7,9  | 0,0061   | 14,3 | 0,0011   |
| BMP7         | 16,4 | 3,25E-05 | 26,8 | 6,74E-06 |
| BMP8B        | 29,9 | 0,0038   | 41,9 | 0,002    |
| BNC1         | 8,7  | 0,002    | 23,9 | 8,59E-05 |
| BTC          | 7,4  | 0,0003   | 14,0 | 2,74E-05 |



|               |      |          |      |          |
|---------------|------|----------|------|----------|
| C10orf107     | 2,9  | 0,012    | 5,0  | 0,0007   |
| C10orf67      | 4,0  | 0,0061   | 7,3  | 0,0004   |
| C11orf80      | 3,7  | 1,93E-05 | 5,2  | 2,13E-06 |
| C12orf75      | 4,5  | 0,0026   | 2,5  | 0,0397   |
| C15orf39      | 2,6  | 0,0042   | 3,4  | 0,0007   |
| C17orf58      | 3,5  | 0,0249   | 4,4  | 0,0112   |
| C19orf33      | 11,8 | 0,0033   | 27,2 | 0,0004   |
| C1GALT1       | 2,3  | 8,27E-05 | 3,5  | 1,48E-06 |
| C1orf226      | 5,6  | 0,0005   | 14,3 | 1,01E-05 |
| C1orf53       | 4,7  | 0,0134   | 6,2  | 0,0052   |
| C1QL1         | 5,5  | 0,0069   | 9,2  | 0,0011   |
| C1QTNF3-AMACR | 3,9  | 0,0257   | 4,8  | 0,0123   |
| C2CD4C        | 2,8  | 0,0069   | 2,2  | 0,0238   |
| C4A           | 4,0  | 0,0387   | 4,4  | 0,0287   |
| C5orf30       | 2,6  | 0,0152   | 2,7  | 0,0104   |
| C6orf132      | 5,3  | 1,08E-05 | 8,6  | 8,09E-07 |
| CA10          | 4,1  | 0,0472   | 4,1  | 0,0472   |
| CA11          | 3,2  | 0,0059   | 5,0  | 0,0005   |
| CA9           | 11,8 | 9,30E-05 | 11,7 | 9,84E-05 |
| CAAP1         | 2,1  | 2,96E-05 | 2,2  | 2,87E-05 |
| CACNA1H       | 3,7  | 0,0198   | 5,5  | 0,0047   |
| CACNB2        | 6,2  | 0,0007   | 7,9  | 0,0003   |
| CACNG4        | 5,0  | 0,0035   | 12,1 | 0,0001   |
| CADM3         | 6,3  | 1,26E-05 | 14,5 | 2,52E-07 |
| CADM4         | 2,6  | 0,0312   | 3,0  | 0,0168   |
| CALB2         | 11,3 | 0,0021   | 42,4 | 5,85E-05 |
| CARD10        | 4,9  | 5,96E-05 | 6,1  | 1,81E-05 |
| CARD16        | 4,1  | 0,0005   | 5,4  | 0,0001   |
| CARNS1        | 7,8  | 0,0063   | 27,5 | 0,0002   |
| CASC15        | 4,3  | 0,042    | 6,9  | 0,0106   |
| CASZ1         | 3,2  | 0,0149   | 4,4  | 0,0038   |
| CAV2          | 2,4  | 0,0024   | 2,2  | 0,0044   |
| CAVIN2        | 4,8  | 0,0356   | 7,9  | 0,0089   |
| CBLN2         | 5,2  | 0,0191   | 10,9 | 0,0021   |
| CCDC183       | 2,7  | 0,0291   | 4,1  | 0,0046   |
| CCDC51        | 3,5  | 0,0227   | 4,4  | 0,0096   |
| CCDC6         | 2,1  | 0,0024   | 2,4  | 0,0009   |
| CCDC69        | 2,6  | 0,0014   | 2,8  | 0,001    |
| CCDC85A       | 2,3  | 0,037    | 2,4  | 0,025    |
| CCDC85C       | 4,6  | 0,0045   | 7,5  | 0,0006   |
| CCNYL1        | 3,1  | 0,0192   | 4,0  | 0,0063   |
| CCSER1        | 3,1  | 0,006    | 5,5  | 0,0003   |
| CD200         | 5,4  | 0,0002   | 6,2  | 0,0001   |
| CD24          | 15,5 | 0,0027   | 7,7  | 0,0157   |
| CD55          | 5,0  | 0,0172   | 6,8  | 0,0062   |
| CDA           | 5,6  | 0,0141   | 5,5  | 0,0149   |
| CDCP1         | 7,0  | 0,0094   | 17,5 | 0,0007   |
| CDH1          | 4,5  | 0,0141   | 10,4 | 0,0008   |
| CDH3          | 7,7  | 0,0199   | 28,1 | 0,0009   |
| CDHR4         | 2,1  | 0,0194   | 4,0  | 0,0003   |
| CDKN2A        | 5,2  | 0,0319   | 6,0  | 0,0225   |
| CDS1          | 4,6  | 0,0006   | 5,1  | 0,0004   |

|         |      |          |      |          |
|---------|------|----------|------|----------|
| CELSR1  | 4,6  | 0,0103   | 9,6  | 0,0007   |
| CERS1   | 3,1  | 0,0166   | 4,0  | 0,0054   |
| CFAP57  | 3,2  | 0,0476   | 3,9  | 0,0226   |
| CFB     | 4,5  | 0,0002   | 6,9  | 1,63E-05 |
| CFL2    | 2,0  | 0,0088   | 2,1  | 0,007    |
| CFTR    | 4,8  | 8,91E-05 | 6,0  | 2,67E-05 |
| CGN     | 10,6 | 0,0012   | 18,8 | 0,0002   |
| CHGB    | 4,6  | 0,0464   | 4,8  | 0,0405   |
| CHMP4C  | 4,1  | 0,0003   | 5,7  | 3,92E-05 |
| CHST15  | 5,2  | 0,0005   | 2,6  | 0,0175   |
| CHST4   | 13,6 | 0,0014   | 18,6 | 0,0006   |
| CLDN1   | 7,7  | 0,0019   | 21,6 | 6,63E-05 |
| CLDN15  | 7,0  | 0,0005   | 11,8 | 6,91E-05 |
| CLDN16  | 7,0  | 0,0018   | 4,6  | 0,0088   |
| CLIC3   | 10,6 | 1,22E-05 | 19,3 | 1,20E-06 |
| CMAHP   | 3,2  | 0,0097   | 3,9  | 0,0037   |
| CNTN4   | 3,2  | 0,05     | 8,8  | 0,0016   |
| CNTN6   | 4,7  | 0,0044   | 7,4  | 0,0007   |
| CNTNAP3 | 6,2  | 0,0061   | 17,4 | 0,0002   |
| COBL    | 9,3  | 0,0343   | 16,3 | 0,0112   |
| COBLL1  | 3,7  | 0,0018   | 5,2  | 0,0003   |
| COL2A1  | 2,8  | 0,047    | 3,3  | 0,0277   |
| COL8A1  | 5,3  | 0,0496   | 10,9 | 0,0089   |
| CORO1C  | 2,2  | 0,0006   | 2,4  | 0,0003   |
| CPA4    | 6,0  | 0,0005   | 8,7  | 9,46E-05 |
| CPNE5   | 5,5  | 0,0009   | 4,1  | 0,0033   |
| CR1     | 5,8  | 0,0012   | 10,4 | 0,0001   |
| CRB2    | 6,1  | 0,0153   | 16,6 | 0,0009   |
| CRB3    | 3,5  | 0,0028   | 6,4  | 0,0001   |
| CREB5   | 3,9  | 0,032    | 5,5  | 0,0108   |
| CRIP1   | 2,9  | 3,66E-05 | 3,0  | 3,13E-05 |
| CRIP2   | 2,4  | 0,0046   | 2,6  | 0,0028   |
| CRMP1   | 4,1  | 0,0127   | 10,3 | 0,0004   |
| CSNK2A3 | 3,4  | 0,0264   | 8,5  | 0,0008   |
| CST6    | 8,0  | 0,0011   | 6,4  | 0,0026   |
| CTNNA2  | 3,9  | 0,0024   | 4,4  | 0,0013   |
| CTNNA3  | 6,8  | 0,0002   | 13,1 | 1,38E-05 |
| CTSG    | 3,3  | 0,0407   | 4,3  | 0,0173   |
| CTSV    | 3,3  | 0,0241   | 2,9  | 0,0387   |
| CXADR   | 9,2  | 3,73E-05 | 27,5 | 6,53E-07 |
| CXCL6   | 4,2  | 0,0312   | 4,3  | 0,029    |
| CYFIP2  | 4,7  | 0,0213   | 9,5  | 0,0023   |
| CYP21A2 | 2,2  | 0,049    | 2,4  | 0,031    |
| CYP2J2  | 7,5  | 0,0008   | 20,3 | 2,43E-05 |
| CYP2S1  | 10,7 | 0,0014   | 24,3 | 0,0001   |
| CYP3A5  | 6,6  | 0,0053   | 25,5 | 8,15E-05 |
| CYP4B1  | 5,4  | 0,044    | 5,9  | 0,0359   |
| DACT2   | 15,0 | 0,0004   | 37,0 | 2,96E-05 |
| DAPK1   | 3,9  | 0,0119   | 4,9  | 0,0044   |
| DBN1    | 3,1  | 0,0093   | 3,0  | 0,0097   |
| DBNDD2  | 4,2  | 2,29E-07 | 6,9  | 8,78E-09 |
| DDI1    | 3,6  | 0,023    | 3,0  | 0,0432   |

|          |      |          |      |          |
|----------|------|----------|------|----------|
| DDR1     | 2,5  | 0,0183   | 2,4  | 0,0231   |
| DEFB1    | 8,7  | 0,0424   | 9,6  | 0,0348   |
| DENND3   | 3,3  | 0,0016   | 6,1  | 4,53E-05 |
| DFNA5    | 4,2  | 3,32E-05 | 5,8  | 4,56E-06 |
| DHCR24   | 3,2  | 0,0041   | 4,2  | 0,0009   |
| DHCR7    | 3,3  | 0,002    | 5,2  | 0,0001   |
| DHRS13   | 4,8  | 0,0016   | 2,8  | 0,0225   |
| DIAPH1   | 3,5  | 0,0004   | 4,4  | 9,19E-05 |
| DIAPH3   | 6,9  | 0,019    | 7,7  | 0,0143   |
| DISP1    | 7,3  | 0,0002   | 14,6 | 1,00E-05 |
| DKK1     | 5,2  | 0,0194   | 7,4  | 0,0068   |
| DKK2     | 8,3  | 0,0011   | 4,3  | 0,0123   |
| DLEC1    | 4,7  | 0,0067   | 3,9  | 0,014    |
| DMTN     | 3,7  | 0,0416   | 7,0  | 0,0051   |
| DNAAF3   | 7,1  | 2,18E-05 | 10,8 | 3,01E-06 |
| DNAH5    | 2,5  | 0,0231   | 3,7  | 0,0029   |
| DNAJC22  | 7,7  | 0,0127   | 27,6 | 0,0005   |
| DNMT3L   | 4,9  | 0,0051   | 3,7  | 0,0158   |
| DOC2A    | 3,1  | 0,034    | 3,0  | 0,0355   |
| DOCK4    | 2,4  | 0,0282   | 2,8  | 0,0129   |
| DPP10    | 5,0  | 0,0027   | 7,5  | 0,0005   |
| DPP4     | 9,5  | 0,0002   | 17,7 | 1,59E-05 |
| DPYSL2   | 3,7  | 0,0017   | 5,2  | 0,0003   |
| DSC2     | 5,1  | 0,0013   | 8,8  | 0,0001   |
| DSC3     | 6,2  | 0,0017   | 9,0  | 0,0004   |
| DSG2     | 8,9  | 0,0005   | 18,8 | 3,95E-05 |
| DSP      | 7,1  | 0,0167   | 41,9 | 0,0002   |
| E2F5     | 2,1  | 0,0266   | 2,2  | 0,0199   |
| E2F7     | 2,2  | 0,0393   | 2,5  | 0,0201   |
| EBP      | 2,5  | 1,08E-07 | 2,7  | 4,43E-08 |
| ECEL1    | 2,3  | 0,0294   | 3,9  | 0,0016   |
| ECT2     | 2,5  | 0,0007   | 2,5  | 0,0007   |
| EDEM2    | 2,8  | 5,99E-05 | 2,5  | 0,0001   |
| EEF1A2   | 7,6  | 0,0104   | 14,8 | 0,0017   |
| EFNA5    | 5,8  | 0,0002   | 11,2 | 9,28E-06 |
| EMB      | 9,6  | 1,55E-07 | 18,5 | 8,94E-09 |
| EMILIN2  | 2,2  | 0,0005   | 2,5  | 0,0001   |
| EML5     | 3,8  | 0,0069   | 3,9  | 0,0066   |
| EMP3     | 2,3  | 0,011    | 3,0  | 0,0016   |
| ENC1     | 3,6  | 0,0223   | 6,1  | 0,0028   |
| ENDOD1   | 2,1  | 0,0198   | 2,4  | 0,0074   |
| ENPP4    | 4,6  | 8,25E-05 | 6,2  | 1,61E-05 |
| EPB41    | 4,3  | 0,0036   | 5,8  | 0,001    |
| EPB41L4A | 2,6  | 9,79E-05 | 3,9  | 2,88E-06 |
| EPB42    | 4,3  | 0,0165   | 8,8  | 0,0014   |
| EPHB6    | 3,7  | 5,17E-06 | 5,8  | 2,43E-07 |
| EPS8L1   | 7,2  | 0,0001   | 17,3 | 3,56E-06 |
| ERBB3    | 11,9 | 3,76E-05 | 24,1 | 3,13E-06 |
| ERBB4    | 8,1  | 0,0022   | 13,8 | 0,0004   |
| ERC2     | 6,6  | 0,0031   | 12,4 | 0,0004   |
| ERICH5   | 10,1 | 0,0002   | 18,1 | 3,00E-05 |
| EVPL     | 6,8  | 0,0031   | 27,9 | 3,40E-05 |

|          |      |          |      |          |
|----------|------|----------|------|----------|
| EXOC6    | 2,6  | 0,0087   | 3,5  | 0,0012   |
| EZR      | 7,9  | 0,0005   | 14,2 | 5,68E-05 |
| F11R     | 5,4  | 0,0052   | 7,1  | 0,0019   |
| F5       | 7,0  | 0,0253   | 7,4  | 0,0218   |
| FAAH2    | 4,4  | 0,0075   | 5,3  | 0,0034   |
| FABP3    | 3,1  | 0,0457   | 3,3  | 0,0386   |
| FAM110C  | 5,1  | 0,025    | 7,0  | 0,0099   |
| FAM133A  | 3,6  | 0,025    | 3,4  | 0,0324   |
| FAM153C  | 7,0  | 0,0066   | 12,6 | 0,0011   |
| FAM155A  | 7,6  | 0,0363   | 19,3 | 0,0048   |
| FAM160A1 | 5,3  | 0,0153   | 11,3 | 0,0014   |
| FAM163A  | 6,1  | 0,0372   | 16,6 | 0,0034   |
| FAM167A  | 6,4  | 0,0022   | 5,7  | 0,0035   |
| FAM189A1 | 6,1  | 0,0005   | 26,9 | 1,90E-06 |
| FAM189A2 | 4,6  | 0,0248   | 37,7 | 5,05E-05 |
| FAM19A3  | 4,6  | 0,0228   | 5,0  | 0,017    |
| FAM212B  | 3,8  | 0,0167   | 6,9  | 0,0016   |
| FAM213B  | 2,9  | 0,0047   | 2,0  | 0,0389   |
| FAM221A  | 2,5  | 0,0093   | 2,5  | 0,0092   |
| FAM3B    | 8,0  | 0,0006   | 11,0 | 0,0002   |
| FAM46B   | 5,5  | 0,0051   | 3,8  | 0,0194   |
| FAM49B   | 3,6  | 0,0001   | 4,6  | 2,64E-05 |
| FAM69A   | 2,6  | 0,0072   | 2,3  | 0,0149   |
| FAM78B   | 2,6  | 0,0382   | 3,4  | 0,0101   |
| FAM83H   | 5,8  | 0,0103   | 10,2 | 0,0017   |
| FAM84B   | 3,1  | 0,0383   | 5,3  | 0,005    |
| FAM86JP  | 2,1  | 0,0215   | 2,2  | 0,0174   |
| FANCF    | 2,6  | 0,0013   | 3,1  | 0,0003   |
| FAR2     | 5,1  | 0,009    | 9,3  | 0,0011   |
| FASTKD1  | 2,4  | 0,0072   | 2,5  | 0,0059   |
| FAT3     | 3,3  | 0,0038   | 2,5  | 0,0182   |
| FATE1    | 5,6  | 0,0012   | 5,6  | 0,0012   |
| FBN1     | 2,9  | 0,0417   | 2,9  | 0,0429   |
| FBP1     | 7,7  | 3,52E-05 | 3,9  | 0,0011   |
| FBXO2    | 4,3  | 0,0068   | 6,9  | 0,001    |
| FCRLB    | 7,1  | 0,0005   | 10,1 | 0,0001   |
| FDXR     | 2,3  | 0,0306   | 4,0  | 0,0017   |
| FGF1     | 8,9  | 0,0131   | 14,1 | 0,0042   |
| FGF9     | 8,4  | 0,0012   | 19,6 | 7,70E-05 |
| FGFBP1   | 6,1  | 0,0272   | 33,2 | 0,0004   |
| FHDC1    | 2,9  | 0,0134   | 3,6  | 0,0043   |
| FHOD3    | 5,8  | 0,0121   | 6,0  | 0,0114   |
| FLJ27354 | 3,0  | 0,023    | 3,3  | 0,0152   |
| FLNC     | 3,2  | 0,0071   | 2,3  | 0,0394   |
| FLRT2    | 2,9  | 0,0443   | 3,8  | 0,0163   |
| FLRT3    | 3,0  | 0,0218   | 3,7  | 0,0091   |
| FNDC1    | 7,7  | 0,0032   | 6,6  | 0,0054   |
| FOXI2    | 20,4 | 0,0001   | 15,7 | 0,0003   |
| FRAS1    | 4,8  | 0,0442   | 13,8 | 0,0027   |
| FRK      | 3,0  | 0,0384   | 3,2  | 0,0297   |
| FRY      | 3,6  | 0,0303   | 4,6  | 0,0121   |
| FUCA1    | 2,8  | 0,0008   | 2,5  | 0,0016   |

|            |      |          |      |          |
|------------|------|----------|------|----------|
| FZD6       | 4,7  | 0,049    | 11,0 | 0,0054   |
| GAL3ST2    | 5,0  | 0,0104   | 11,0 | 0,0007   |
| GALNT12    | 4,3  | 0,008    | 4,6  | 0,0059   |
| GALNT14    | 4,9  | 0,021    | 8,6  | 0,0039   |
| GALNT15    | 9,3  | 0,0006   | 14,0 | 0,0001   |
| GALNT18    | 8,0  | 0,0004   | 8,7  | 0,0003   |
| GALNT9     | 9,8  | 0,0133   | 45,3 | 0,0004   |
| GALR1      | 7,9  | 0,0161   | 6,3  | 0,0281   |
| GAP43      | 7,0  | 0,0013   | 8,3  | 0,0007   |
| GATA5      | 5,8  | 0,025    | 5,7  | 0,026    |
| GATM       | 6,1  | 0,0005   | 11,2 | 3,64E-05 |
| GCNT1      | 5,5  | 0,0064   | 7,0  | 0,0027   |
| GCNT2      | 4,8  | 0,0065   | 6,7  | 0,0018   |
| GDF1       | 3,1  | 0,0158   | 4,1  | 0,0046   |
| GFRA3      | 3,8  | 0,0092   | 4,1  | 0,0065   |
| GGT1       | 3,2  | 0,0312   | 6,0  | 0,0029   |
| GIPC2      | 2,5  | 0,0021   | 2,3  | 0,0047   |
| GJA3       | 9,3  | 0,0006   | 20,8 | 3,76E-05 |
| GKAP1      | 2,4  | 0,0385   | 2,3  | 0,0421   |
| GLRB       | 5,4  | 0,0026   | 5,7  | 0,0021   |
| GNAZ       | 6,7  | 0,0076   | 15,8 | 0,0006   |
| GOLGA2P10  | 4,5  | 0,0023   | 5,5  | 0,001    |
| GOLGA6L9   | 2,3  | 0,0033   | 4,3  | 3,56E-05 |
| GPM6A      | 6,4  | 0,0049   | 18,6 | 0,0002   |
| GPR1       | 9,8  | 0,001    | 15,4 | 0,0002   |
| GPR143     | 9,6  | 0,0035   | 8,9  | 0,0044   |
| GPR37      | 5,3  | 0,0001   | 9,6  | 7,27E-06 |
| GPT2       | 3,9  | 0,0014   | 3,6  | 0,0021   |
| GRB7       | 9,6  | 0,0045   | 11,5 | 0,0027   |
| GRIK5      | 4,4  | 0,0073   | 22,3 | 1,99E-05 |
| GRIN2A     | 5,0  | 0,0092   | 5,3  | 0,0071   |
| GRIP1      | 5,2  | 0,0248   | 7,2  | 0,0095   |
| GSAP       | 4,7  | 0,0078   | 6,7  | 0,002    |
| GUCY1A2    | 5,8  | 0,0173   | 8,2  | 0,0063   |
| HACD1      | 3,4  | 0,0016   | 3,0  | 0,0039   |
| HAS1       | 5,6  | 0,0011   | 12,2 | 4,42E-05 |
| HCFC1R1    | 3,2  | 0,0007   | 2,0  | 0,0177   |
| HEG1       | 2,7  | 1,56E-06 | 3,4  | 1,85E-07 |
| HEPACAM    | 7,9  | 6,42E-05 | 13,7 | 6,80E-06 |
| HERC3      | 2,1  | 0,0021   | 2,4  | 0,0009   |
| HERC5      | 2,0  | 0,0114   | 2,1  | 0,0086   |
| HID1       | 5,2  | 0,0035   | 9,2  | 0,0004   |
| HIST1H3D   | 7,6  | 0,0079   | 12,4 | 0,0019   |
| HLA-F      | 2,9  | 0,0461   | 3,9  | 0,0144   |
| HMSD       | 4,2  | 0,0097   | 3,0  | 0,0344   |
| HNRNPA1P33 | 12,4 | 0,0022   | 29,2 | 0,0002   |
| HOMER2     | 3,1  | 0,0056   | 3,3  | 0,0045   |
| HOOK1      | 5,3  | 0,0037   | 12,0 | 0,0002   |
| HOXA10     | 4,2  | 0,005    | 5,0  | 0,0023   |
| HP         | 10,4 | 0,002    | 21,5 | 0,0002   |
| HPCAL1     | 2,5  | 0,0015   | 2,5  | 0,0013   |
| HPR        | 4,9  | 0,0224   | 7,8  | 0,0051   |

|         |      |          |      |          |
|---------|------|----------|------|----------|
| HPS6    | 2,0  | 0,0002   | 2,1  | 0,0001   |
| HPSE    | 4,8  | 2,74E-06 | 7,2  | 2,27E-07 |
| HRASLS5 | 3,6  | 0,0038   | 7,4  | 0,0001   |
| HS3ST1  | 6,1  | 0,0077   | 12,2 | 0,0008   |
| HSBP1L1 | 3,1  | 0,013    | 3,4  | 0,0093   |
| HSD17B2 | 7,3  | 0,0066   | 14,5 | 0,0008   |
| HSD17B6 | 11,8 | 0,0002   | 33,7 | 5,66E-06 |
| HSD17B7 | 4,0  | 0,0005   | 4,4  | 0,0003   |
| HSD17B8 | 2,2  | 0,0008   | 2,1  | 0,0014   |
| HSD3B7  | 6,0  | 3,00E-05 | 6,8  | 1,59E-05 |
| HSPB7   | 4,1  | 0,0031   | 3,5  | 0,0065   |
| HUNK    | 5,2  | 0,0019   | 8,1  | 0,0003   |
| HYAL1   | 5,0  | 1,41E-05 | 3,0  | 0,0005   |
| IER3    | 2,5  | 0,0322   | 2,6  | 0,0233   |
| IFI27   | 2,5  | 5,83E-06 | 3,1  | 8,38E-07 |
| IFNE    | 3,7  | 0,0106   | 3,7  | 0,0102   |
| IFNLR1  | 2,1  | 0,0262   | 2,5  | 0,0073   |
| IGFL2   | 7,5  | 0,0162   | 24,3 | 0,0008   |
| IGSF9   | 13,3 | 0,0001   | 38,6 | 5,08E-06 |
| IGSF9B  | 2,9  | 0,0179   | 4,7  | 0,0017   |
| IL17RE  | 6,5  | 0,0166   | 5,3  | 0,0292   |
| IL18    | 7,8  | 3,19E-05 | 18,5 | 9,00E-07 |
| IL1RAP  | 3,8  | 0,0088   | 6,6  | 0,0009   |
| IL20    | 5,8  | 0,0023   | 11,0 | 0,0002   |
| ILDR2   | 7,4  | 0,0034   | 11,2 | 0,0009   |
| INO80C  | 2,7  | 0,0004   | 2,9  | 0,0002   |
| INPP5J  | 2,7  | 0,0316   | 3,5  | 0,0087   |
| IQCA1   | 6,6  | 0,0064   | 20,1 | 0,0002   |
| IRF5    | 4,6  | 0,0007   | 7,4  | 6,33E-05 |
| ISLR2   | 2,7  | 0,0147   | 2,5  | 0,024    |
| ISM2    | 11,0 | 6,36E-05 | 10,0 | 9,42E-05 |
| ITGA11  | 2,6  | 0,0085   | 4,2  | 0,0006   |
| ITGA3   | 6,8  | 0,0016   | 25,5 | 1,79E-05 |
| ITGA6   | 5,4  | 0,0066   | 20,8 | 7,61E-05 |
| ITGB4   | 5,7  | 0,0071   | 15,8 | 0,0002   |
| ITGB8   | 3,9  | 0,021    | 7,2  | 0,0024   |
| ITLN1   | 9,2  | 0,0001   | 21,8 | 6,54E-06 |
| ITLN2   | 10,5 | 0,0145   | 30,9 | 0,0013   |
| JPH1    | 6,4  | 0,0107   | 8,2  | 0,005    |
| KCNA1   | 3,6  | 0,0092   | 5,3  | 0,0015   |
| KCNA3   | 3,1  | 0,0143   | 8,4  | 0,0001   |
| KCNA4   | 8,5  | 0,0042   | 13,4 | 0,0011   |
| KCNAB1  | 12,5 | 0,0011   | 15,3 | 0,0006   |
| KCNB2   | 6,1  | 0,0188   | 13,1 | 0,0022   |
| KCNH3   | 5,8  | 0,0052   | 11,7 | 0,0005   |
| KCNH5   | 6,4  | 1,82E-05 | 18,7 | 1,57E-07 |
| KCNJ11  | 2,4  | 0,0222   | 2,1  | 0,0451   |
| KCNJ16  | 15,6 | 3,65E-05 | 17,6 | 2,42E-05 |
| KCNJ5   | 11,4 | 0,0003   | 9,3  | 0,0006   |
| KCNK5   | 8,1  | 0,0003   | 16,2 | 2,57E-05 |
| KCNN4   | 4,7  | 0,02     | 4,8  | 0,0183   |
| KCNT2   | 2,6  | 0,0033   | 3,3  | 0,0007   |

|              |      |        |      |          |
|--------------|------|--------|------|----------|
| KCTD11       | 2,4  | 0,0181 | 2,4  | 0,0167   |
| KCTD14       | 3,6  | 0,0382 | 11,5 | 0,0008   |
| KDR          | 9,7  | 0,0001 | 21,9 | 6,89E-06 |
| KHDC1        | 2,6  | 0,0216 | 2,4  | 0,0289   |
| KIAA1024     | 3,4  | 0,0177 | 3,5  | 0,017    |
| KIAA1211L    | 11,0 | 0,0019 | 12,5 | 0,0013   |
| KIAA1522     | 4,5  | 0,0003 | 3,5  | 0,0014   |
| KIAA1671     | 3,7  | 0,0038 | 6,6  | 0,0003   |
| KLHL31       | 4,6  | 0,0032 | 6,4  | 0,0007   |
| KLHL4        | 6,1  | 0,0004 | 12,1 | 2,27E-05 |
| KLK1         | 7,4  | 0,0011 | 19,4 | 3,87E-05 |
| KLK11        | 10,2 | 0,0002 | 26,1 | 5,95E-06 |
| KLK5         | 10,9 | 0,0071 | 26,0 | 0,0008   |
| KLK7         | 9,3  | 0,0131 | 37,4 | 0,0005   |
| KLK8         | 6,1  | 0,0032 | 7,9  | 0,0012   |
| KNDC1        | 3,8  | 0,0195 | 3,3  | 0,0307   |
| KRT16        | 4,0  | 0,0401 | 4,1  | 0,0354   |
| KRT18        | 8,8  | 0,0153 | 21,4 | 0,0018   |
| KRT19        | 9,2  | 0,0078 | 24,9 | 0,0006   |
| KRT5         | 8,0  | 0,0146 | 22,5 | 0,0011   |
| KRT7         | 6,9  | 0,0196 | 20,7 | 0,0012   |
| KRT8         | 8,1  | 0,0098 | 22,9 | 0,0006   |
| KRT80        | 5,7  | 0,0039 | 5,9  | 0,0036   |
| L1CAM        | 5,3  | 0,001  | 8,8  | 0,0001   |
| L3MBTL4      | 2,9  | 0,0039 | 3,8  | 0,0007   |
| LAMA3        | 5,0  | 0,0009 | 3,9  | 0,0032   |
| LAYN         | 3,4  | 0,0114 | 5,1  | 0,0019   |
| LCN2         | 4,4  | 0,0243 | 4,3  | 0,026    |
| LEF1         | 5,4  | 0,0194 | 5,2  | 0,0213   |
| LGALS2       | 6,6  | 0,0131 | 9,2  | 0,0052   |
| LGI2         | 3,9  | 0,0136 | 3,1  | 0,0357   |
| LGR6         | 11,0 | 0,0046 | 17,4 | 0,0014   |
| LHCGR        | 4,7  | 0,0052 | 11,4 | 0,0002   |
| LIME1        | 2,7  | 0,0336 | 3,1  | 0,0184   |
| LIMS2        | 2,5  | 0,0243 | 3,9  | 0,0021   |
| LINC00665    | 4,5  | 0,0005 | 3,4  | 0,0022   |
| LINC00672    | 2,6  | 0,0109 | 3,0  | 0,0046   |
| LINC00842    | 4,0  | 0,0445 | 6,7  | 0,0096   |
| LINC01018    | 6,3  | 0,0027 | 8,7  | 0,0008   |
| LINC01105    | 17,9 | 0,0003 | 28,1 | 8,17E-05 |
| LINC01123    | 2,8  | 0,0082 | 2,6  | 0,0132   |
| LINC01133    | 9,9  | 0,0003 | 19,9 | 3,21E-05 |
| LINC01239    | 3,0  | 0,0235 | 7,0  | 0,0006   |
| LIPC         | 4,5  | 0,0029 | 5,7  | 0,001    |
| LMNB1        | 2,1  | 0,0011 | 2,6  | 0,0002   |
| LMNTD2       | 7,0  | 0,0011 | 7,1  | 0,001    |
| LOC100129291 | 3,4  | 0,0004 | 2,9  | 0,0012   |
| LOC100507387 | 4,1  | 0,0357 | 9,4  | 0,0028   |
| LOC101929431 | 2,3  | 0,0289 | 2,6  | 0,0148   |
| LOC284023    | 2,6  | 0,0038 | 2,2  | 0,0115   |
| LOC641367    | 2,9  | 0,0087 | 2,2  | 0,0362   |
| LOC727751    | 3,6  | 0,018  | 17,3 | 5,61E-05 |

|          |      |          |      |          |
|----------|------|----------|------|----------|
| LOC91450 | 3,3  | 0,0129   | 3,8  | 0,0076   |
| LOXHD1   | 8,4  | 0,0002   | 20,8 | 8,91E-06 |
| LOXL1    | 4,8  | 0,0003   | 3,7  | 0,0012   |
| LRP2     | 10,7 | 0,0057   | 20,0 | 0,0011   |
| LRP2BP   | 3,0  | 0,0132   | 3,2  | 0,0087   |
| LRRC1    | 5,7  | 0,0004   | 10,5 | 3,04E-05 |
| LRRC17   | 5,5  | 0,0081   | 4,3  | 0,0199   |
| LRRC23   | 2,1  | 6,10E-05 | 2,1  | 5,52E-05 |
| LRRC36   | 4,2  | 0,0045   | 3,8  | 0,0073   |
| LRRC38   | 7,8  | 8,52E-05 | 16,8 | 3,94E-06 |
| LRRC8C   | 3,6  | 0,0088   | 4,6  | 0,0029   |
| LRRC8D   | 2,3  | 0,0104   | 2,2  | 0,0145   |
| LRRN4    | 10,0 | 0,0026   | 34,0 | 8,46E-05 |
| LSR      | 6,8  | 0,0034   | 8,2  | 0,0018   |
| LTBP1    | 5,5  | 0,012    | 7,6  | 0,0044   |
| LTC4S    | 2,6  | 0,0034   | 3,6  | 0,0004   |
| LUZP2    | 12,4 | 0,001    | 6,5  | 0,0077   |
| LXN      | 3,0  | 0,0193   | 3,8  | 0,0066   |
| LY6G6C   | 6,5  | 0,0119   | 11,8 | 0,0021   |
| LY6H     | 20,3 | 0,0067   | 32,3 | 0,0027   |
| LYPD6    | 8,1  | 0,0094   | 15,8 | 0,0015   |
| MAL2     | 6,9  | 0,0046   | 15,4 | 0,0003   |
| MAP3K11  | 2,4  | 0,0016   | 2,3  | 0,0029   |
| MAP3K9   | 8,6  | 0,0018   | 10,6 | 0,0009   |
| MAPK14   | 2,1  | 0,0359   | 2,3  | 0,0258   |
| MAPK15   | 3,9  | 0,0015   | 12,8 | 5,44E-06 |
| MARCH1   | 3,5  | 0,0034   | 10,9 | 1,53E-05 |
| MARVELD2 | 4,0  | 0,003    | 4,4  | 0,0018   |
| MAST4    | 2,8  | 0,0016   | 3,4  | 0,0005   |
| MATN4    | 14,1 | 0,0033   | 19,9 | 0,0014   |
| MBNL3    | 2,3  | 0,0019   | 2,9  | 0,0003   |
| MCTP1    | 2,4  | 0,013    | 2,8  | 0,0047   |
| MCTP2    | 8,1  | 0,0033   | 12,2 | 0,0009   |
| MED9     | 2,2  | 0,0033   | 2,1  | 0,0044   |
| MET      | 8,5  | 6,37E-05 | 17,6 | 3,76E-06 |
| METTL25  | 3,6  | 0,0036   | 3,6  | 0,0036   |
| MFAP5    | 4,5  | 0,0473   | 8,2  | 0,0094   |
| MFSD6    | 2,7  | 0,048    | 4,3  | 0,0067   |
| MGST2    | 2,9  | 0,0006   | 2,7  | 0,0012   |
| MID1     | 2,3  | 0,0128   | 2,5  | 0,0084   |
| MISP     | 3,1  | 0,0191   | 6,8  | 0,0007   |
| MMP15    | 6,2  | 0,0081   | 5,9  | 0,0095   |
| MMP24    | 7,5  | 0,0003   | 15,3 | 1,75E-05 |
| MMP27    | 5,6  | 0,0229   | 7,0  | 0,012    |
| MOCS3    | 2,1  | 0,0001   | 2,2  | 7,86E-05 |
| MPP7     | 5,2  | 0,0003   | 10,9 | 1,12E-05 |
| MPPED2   | 3,4  | 0,0012   | 4,2  | 0,0003   |
| MPV17L2  | 2,4  | 0,0062   | 2,0  | 0,0226   |
| MRPL17   | 2,4  | 0,0049   | 2,1  | 0,014    |
| MRPL49   | 2,1  | 0,0144   | 2,3  | 0,0091   |
| MSLN     | 9,5  | 0,0002   | 26,7 | 6,68E-06 |
| MSMO1    | 3,0  | 2,83E-05 | 3,3  | 1,42E-05 |



|         |      |          |      |          |
|---------|------|----------|------|----------|
| MST1    | 7,4  | 0,0004   | 7,1  | 0,0004   |
| MSTN    | 3,7  | 0,0407   | 3,5  | 0,0486   |
| MT3     | 3,4  | 0,0086   | 3,8  | 0,0047   |
| MTHFD1L | 2,2  | 0,0091   | 2,7  | 0,0019   |
| MTMR7   | 4,1  | 0,0116   | 7,2  | 0,0014   |
| MTMR8   | 3,6  | 0,0015   | 3,9  | 0,001    |
| MUC1    | 2,9  | 0,007    | 3,2  | 0,0044   |
| MUC16   | 8,2  | 0,0014   | 26,7 | 3,23E-05 |
| MUM1L1  | 7,0  | 0,0366   | 27,8 | 0,0017   |
| MYD88   | 2,1  | 3,66E-05 | 2,1  | 3,66E-05 |
| MYEF2   | 2,6  | 0,0048   | 2,9  | 0,0024   |
| MYL4    | 3,6  | 0,0003   | 4,2  | 0,0001   |
| MYO5B   | 13,2 | 6,96E-05 | 49,9 | 1,14E-06 |
| MYO5C   | 7,7  | 0,0032   | 18,7 | 0,0002   |
| MYRF    | 8,1  | 0,0045   | 14,5 | 0,0008   |
| N4BP3   | 4,1  | 0,002    | 5,2  | 0,0007   |
| NAP1L3  | 2,4  | 0,0444   | 2,9  | 0,0211   |
| NCEH1   | 3,7  | 0,001    | 7,6  | 2,22E-05 |
| NDFIP2  | 2,2  | 0,004    | 2,0  | 0,0067   |
| NDRG4   | 4,0  | 0,0053   | 8,6  | 0,0002   |
| NEBL    | 4,9  | 0,0231   | 5,3  | 0,0175   |
| NEDD9   | 5,9  | 0,0011   | 4,2  | 0,005    |
| NEK5    | 6,6  | 0,0017   | 4,9  | 0,0054   |
| NFE2L3  | 3,6  | 0,0407   | 4,3  | 0,0248   |
| NHSL1   | 3,3  | 0,0254   | 4,5  | 0,0072   |
| NKAIN1  | 4,7  | 9,14E-06 | 3,3  | 9,37E-05 |
| NME2    | 3,3  | 0,0107   | 5,2  | 0,0013   |
| NOS1AP  | 6,4  | 0,0023   | 19,6 | 5,03E-05 |
| NOVA2   | 11,7 | 0,0085   | 23,2 | 0,0017   |
| NPHS1   | 10,9 | 0,0085   | 8,4  | 0,0162   |
| NQO1    | 2,6  | 0,002    | 2,8  | 0,0011   |
| NRG4    | 4,5  | 0,0077   | 26,1 | 1,63E-05 |
| NSG1    | 12,5 | 0,0005   | 25,7 | 5,76E-05 |
| NTM     | 7,4  | 9,46E-07 | 10,5 | 1,75E-07 |
| NTN1    | 5,9  | 0,0099   | 10,7 | 0,0014   |
| NTN4    | 3,5  | 0,0243   | 5,3  | 0,005    |
| NTNG2   | 4,7  | 0,0262   | 7,3  | 0,0068   |
| NTRK3   | 3,1  | 0,0453   | 4,5  | 0,0108   |
| OCIAD2  | 5,5  | 0,0021   | 8,7  | 0,0003   |
| OCLN    | 7,9  | 0,0011   | 19,0 | 5,59E-05 |
| OLFML2A | 6,9  | 0,0019   | 8,4  | 0,0009   |
| OSBP2   | 4,9  | 0,0054   | 10,0 | 0,0004   |
| OSBPL3  | 3,5  | 0,0106   | 3,6  | 0,0096   |
| OVCA2   | 3,9  | 0,0025   | 4,3  | 0,0015   |
| OXTR    | 2,9  | 0,0404   | 5,9  | 0,0024   |
| P2RX2   | 6,0  | 0,0024   | 6,8  | 0,0015   |
| PALD1   | 3,5  | 0,0128   | 2,6  | 0,0431   |
| PAQR5   | 5,2  | 0,0165   | 7,3  | 0,0054   |
| PAQR9   | 4,5  | 0,0003   | 8,5  | 1,30E-05 |
| PARD6A  | 3,4  | 0,0181   | 3,4  | 0,0172   |
| PARD6B  | 6,7  | 0,0029   | 13,8 | 0,0003   |
| PATJ    | 2,7  | 0,0099   | 3,8  | 0,0015   |

|          |      |          |      |          |
|----------|------|----------|------|----------|
| PBOV1    | 6,5  | 0,0069   | 8,0  | 0,0035   |
| PCDH20   | 6,0  | 0,0101   | 8,5  | 0,0034   |
| PCK1     | 3,6  | 0,0091   | 2,7  | 0,0326   |
| PCK2     | 4,1  | 0,0011   | 5,5  | 0,0002   |
| PCLO     | 9,7  | 3,79E-05 | 15,8 | 5,51E-06 |
| PCOLCE2  | 2,9  | 0,0001   | 2,4  | 0,0006   |
| PCP4     | 13,6 | 0,0005   | 17,4 | 0,0003   |
| PDE10A   | 4,2  | 0,0003   | 6,4  | 3,58E-05 |
| PDE8B    | 6,0  | 0,0007   | 14,4 | 1,93E-05 |
| PDGFB    | 3,6  | 0,0081   | 3,5  | 0,0089   |
| PDGFC    | 6,9  | 0,0002   | 6,7  | 0,0002   |
| PDIA2    | 3,4  | 0,0163   | 8,2  | 0,0005   |
| PDLIM5   | 2,4  | 0,0014   | 2,6  | 0,0008   |
| PDZK1IP1 | 9,5  | 0,0023   | 17,1 | 0,0004   |
| PDZRN4   | 7,0  | 0,0011   | 12,4 | 0,0001   |
| PGBD3    | 2,5  | 0,0016   | 2,9  | 0,0005   |
| PHGDH    | 2,2  | 0,0186   | 2,1  | 0,0201   |
| PI3      | 5,9  | 0,0387   | 12,9 | 0,0059   |
| PICK1    | 2,2  | 0,0122   | 2,2  | 0,0094   |
| PIK3CD   | 2,9  | 0,0096   | 2,6  | 0,0155   |
| PIP5K1B  | 8,7  | 0,0019   | 14,2 | 0,0004   |
| PKHD1L1  | 9,7  | 0,0002   | 29,5 | 5,22E-06 |
| PKIA     | 3,2  | 0,0359   | 3,7  | 0,0207   |
| PKP2     | 5,7  | 0,0307   | 6,0  | 0,0259   |
| PLA2G16  | 2,1  | 0,0049   | 2,1  | 0,0051   |
| PLA2G2A  | 5,1  | 0,0065   | 7,9  | 0,0013   |
| PLA2G7   | 2,8  | 0,032    | 4,1  | 0,0063   |
| PLCB1    | 3,6  | 5,52E-06 | 6,8  | 7,59E-08 |
| PLCD1    | 2,2  | 0,0113   | 2,8  | 0,0021   |
| PLEKHA7  | 3,2  | 0,0061   | 2,8  | 0,0123   |
| PLEKHB1  | 7,1  | 0,0021   | 10,3 | 0,0006   |
| PLEKHG4  | 3,4  | 0,007    | 3,4  | 0,0065   |
| PLEKHG4B | 3,8  | 0,0008   | 2,7  | 0,0067   |
| PLLP     | 10,3 | 0,0024   | 27,9 | 0,0001   |
| PLXNB1   | 2,3  | 0,0113   | 3,5  | 0,0006   |
| PODXL    | 8,5  | 0,0008   | 29,1 | 1,33E-05 |
| POF1B    | 5,6  | 0,0058   | 5,8  | 0,0052   |
| POPDC2   | 3,7  | 0,001    | 4,4  | 0,0004   |
| PPBP     | 3,2  | 0,0054   | 3,8  | 0,002    |
| PPM1L    | 2,0  | 0,043    | 2,1  | 0,04     |
| PPP1R26  | 2,0  | 0,0441   | 2,2  | 0,0262   |
| PPP4R4   | 7,0  | 0,0023   | 3,8  | 0,0227   |
| PREX1    | 2,7  | 0,0068   | 3,1  | 0,003    |
| PRKG2    | 6,0  | 0,0011   | 11,9 | 7,30E-05 |
| PROCR    | 3,5  | 0,0432   | 5,7  | 0,008    |
| PROSER2  | 2,3  | 0,0066   | 4,0  | 0,0002   |
| PRPH     | 6,2  | 0,0412   | 7,3  | 0,0287   |
| PRR5L    | 8,8  | 0,0014   | 3,5  | 0,0347   |
| PRR9     | 5,6  | 0,001    | 11,7 | 4,91E-05 |
| PRSS23   | 4,8  | 0,0003   | 5,4  | 0,0001   |
| PRSS8    | 4,6  | 0,0366   | 4,2  | 0,0496   |
| PSG4     | 6,9  | 0,0043   | 12,4 | 0,0007   |

|           |      |          |      |          |
|-----------|------|----------|------|----------|
| PSORS1C1  | 4,8  | 0,0121   | 7,3  | 0,0029   |
| PTGIS     | 3,3  | 0,0012   | 5,2  | 8,58E-05 |
| PTGS1     | 5,3  | 0,0003   | 5,3  | 0,0004   |
| PTH2R     | 17,1 | 0,0078   | 42,5 | 0,0012   |
| PTHLH     | 7,7  | 0,0001   | 12,3 | 1,54E-05 |
| PTK2B     | 4,3  | 0,0043   | 4,7  | 0,003    |
| PTPN14    | 2,1  | 0,0068   | 2,0  | 0,0083   |
| PTPN3     | 4,9  | 0,0019   | 11,6 | 5,58E-05 |
| PTPRH     | 2,6  | 0,012    | 4,9  | 0,0003   |
| PTPRN2    | 4,7  | 0,0008   | 3,1  | 0,0071   |
| PTPRZ1    | 5,0  | 0,0027   | 12,0 | 8,89E-05 |
| PXDNL     | 14,2 | 0,006    | 17,6 | 0,0036   |
| QPCTL     | 2,2  | 0,0093   | 2,1  | 0,0151   |
| QRFPR     | 3,5  | 0,0036   | 3,2  | 0,0059   |
| RAB11FIP1 | 2,9  | 0,0108   | 3,0  | 0,0081   |
| RAB11FIP4 | 2,1  | 0,0319   | 2,7  | 0,0059   |
| RAB27B    | 10,1 | 0,0002   | 20,5 | 1,25E-05 |
| RAB32     | 2,1  | 0,0048   | 2,2  | 0,0029   |
| RAB33A    | 3,0  | 0,0032   | 2,8  | 0,005    |
| RAB37     | 16,4 | 9,52E-05 | 13,1 | 0,0002   |
| RAET1E    | 9,8  | 0,0003   | 21,4 | 1,96E-05 |
| RAET1G    | 2,3  | 0,0117   | 2,0  | 0,0263   |
| RAP1GAP2  | 3,0  | 0,0401   | 4,6  | 0,0074   |
| RASEF     | 3,2  | 0,0338   | 4,5  | 0,0095   |
| RASGRP4   | 4,2  | 0,002    | 7,0  | 0,0002   |
| RASSF7    | 10,8 | 0,0038   | 18,2 | 0,0009   |
| RBKS      | 2,1  | 0,0016   | 2,3  | 0,0006   |
| RBM47     | 4,7  | 0,0024   | 8,0  | 0,0003   |
| REC8      | 5,5  | 0,0025   | 6,0  | 0,0017   |
| REEP1     | 7,6  | 0,0019   | 15,7 | 0,0002   |
| RELL2     | 3,0  | 0,0021   | 2,7  | 0,0037   |
| RETREG1   | 8,6  | 3,72E-05 | 12,7 | 7,37E-06 |
| RFFL      | 2,6  | 0,0129   | 2,9  | 0,0069   |
| RGS4      | 7,3  | 0,0069   | 9,8  | 0,0029   |
| RHBDL2    | 9,5  | 0,0006   | 12,9 | 0,0002   |
| RHOC      | 2,1  | 0,0035   | 2,1  | 0,0031   |
| RHPN2     | 2,9  | 0,0076   | 3,3  | 0,0032   |
| RIC3      | 6,9  | 3,18E-05 | 22,5 | 2,28E-07 |
| RIN1      | 2,7  | 0,0187   | 3,0  | 0,0101   |
| RIPK4     | 11,2 | 0,0005   | 29,0 | 2,59E-05 |
| RND2      | 7,7  | 9,38E-05 | 9,2  | 4,15E-05 |
| ROBO4     | 3,8  | 0,0003   | 4,2  | 0,0001   |
| RORC      | 8,9  | 0,0274   | 20,5 | 0,0046   |
| RPRM      | 6,5  | 0,0006   | 12,9 | 3,92E-05 |
| RSPH3     | 3,4  | 0,0008   | 3,2  | 0,0013   |
| RSPO1     | 7,0  | 0,0027   | 10,3 | 0,0007   |
| RTN1      | 5,1  | 9,02E-05 | 6,0  | 3,61E-05 |
| RTN2      | 3,3  | 0,004    | 2,2  | 0,0367   |
| RTN4RL1   | 4,1  | 0,0126   | 5,5  | 0,0037   |
| RUNDC1    | 2,0  | 0,0307   | 2,2  | 0,0152   |
| S100A1    | 3,6  | 0,0063   | 4,1  | 0,0033   |
| S100A10   | 2,1  | 0,0003   | 2,5  | 6,44E-05 |

|             |      |          |      |          |
|-------------|------|----------|------|----------|
| S100A14     | 2,1  | 0,005    | 2,1  | 0,0066   |
| S100A16     | 2,9  | 0,0176   | 3,3  | 0,0103   |
| S100A2      | 6,4  | 0,0298   | 8,9  | 0,0129   |
| SAMD10      | 2,8  | 0,0029   | 2,8  | 0,0029   |
| SAMD12      | 6,9  | 0,0045   | 15,5 | 0,0003   |
| SAMD9       | 2,7  | 0,0299   | 4,2  | 0,0038   |
| SBK2        | 6,9  | 0,0002   | 7,7  | 0,0001   |
| SCEL        | 11,6 | 0,002    | 23,5 | 0,0003   |
| SCG5        | 2,7  | 0,0226   | 2,5  | 0,0362   |
| SCN2A       | 4,8  | 0,015    | 6,3  | 0,0062   |
| SCN3B       | 5,2  | 0,0017   | 6,1  | 0,0009   |
| SCN5A       | 4,9  | 0,0188   | 15,7 | 0,0005   |
| SCNN1A      | 4,1  | 0,0027   | 4,8  | 0,0012   |
| SDR42E1     | 6,1  | 0,0033   | 6,6  | 0,0025   |
| SDSL        | 5,2  | 0,0003   | 6,3  | 0,0001   |
| SEC11C      | 4,4  | 2,18E-05 | 6,8  | 1,57E-06 |
| SEMA3B      | 2,6  | 0,0004   | 3,1  | 8,07E-05 |
| SEMA3C      | 6,8  | 0,0002   | 10,6 | 2,59E-05 |
| SEMA3F      | 10,4 | 0,0045   | 7,5  | 0,0112   |
| SEMA4D      | 2,8  | 0,0125   | 3,5  | 0,0042   |
| SERAC1      | 3,9  | 0,0007   | 5,3  | 0,0001   |
| SERINC2     | 3,9  | 0,0111   | 4,1  | 0,0088   |
| SERPINB8    | 2,8  | 0,0312   | 2,9  | 0,0268   |
| SERPINE3    | 9,3  | 0,0003   | 23,4 | 1,06E-05 |
| SERTAD4-AS1 | 2,6  | 0,045    | 3,7  | 0,0094   |
| SERTM1      | 5,1  | 0,0059   | 15,5 | 0,0001   |
| SGMS2       | 2,8  | 0,0106   | 3,9  | 0,002    |
| SGO2        | 6,1  | 0,0053   | 9,0  | 0,0013   |
| SGPP2       | 12,1 | 0,002    | 19,6 | 0,0005   |
| SH2D4A      | 5,5  | 0,0006   | 5,1  | 0,0009   |
| SH3BGRL3    | 2,4  | 0,0189   | 2,9  | 0,0058   |
| SH3BP4      | 2,6  | 0,0009   | 2,9  | 0,0003   |
| SH3GL2      | 9,2  | 0,0017   | 6,5  | 0,0055   |
| SH3GLB2     | 2,3  | 5,94E-05 | 3,0  | 3,85E-06 |
| SH3RF2      | 2,3  | 0,0109   | 5,3  | 6,69E-05 |
| SH3TC2      | 2,7  | 0,0288   | 5,1  | 0,0014   |
| SHE         | 2,2  | 0,0003   | 3,0  | 1,25E-05 |
| SHISA6      | 15,9 | 0,0065   | 29,4 | 0,0017   |
| SHROOM2     | 6,3  | 0,0039   | 13,4 | 0,0003   |
| SHROOM3     | 3,6  | 0,0254   | 10,1 | 0,0006   |
| SHTN1       | 2,9  | 0,0002   | 5,0  | 5,42E-06 |
| SIAH3       | 5,0  | 0,0289   | 7,4  | 0,0091   |
| SLAIN1      | 5,4  | 0,0009   | 14,4 | 1,60E-05 |
| SLC22A23    | 3,9  | 0,0009   | 5,2  | 0,0002   |
| SLC22A5     | 2,5  | 0,023    | 3,1  | 0,0075   |
| SLC28A3     | 10,3 | 0,0057   | 44,4 | 0,0001   |
| SLC35E4     | 3,3  | 0,0063   | 2,7  | 0,017    |
| SLC39A8     | 3,6  | 0,0081   | 7,2  | 0,0004   |
| SLC44A5     | 2,6  | 0,0364   | 5,0  | 0,0018   |
| SLC4A4      | 9,7  | 1,56E-07 | 15,5 | 1,93E-08 |
| SLC52A3     | 2,0  | 0,0043   | 2,1  | 0,0036   |
| SLC7A4      | 3,5  | 0,0132   | 3,0  | 0,0243   |

|            |      |        |      |          |
|------------|------|--------|------|----------|
| SLC8A1-AS1 | 4,0  | 0,0309 | 5,2  | 0,013    |
| SLC9A3R1   | 6,4  | 0,0003 | 10,0 | 4,21E-05 |
| SLC9C2     | 6,3  | 0,0045 | 10,1 | 0,0009   |
| SLFN11     | 2,1  | 0,0037 | 2,3  | 0,0017   |
| SLITRK4    | 6,4  | 0,0099 | 7,0  | 0,0078   |
| SLPI       | 13,1 | 0,0001 | 25,0 | 1,90E-05 |
| SMPD3      | 11,7 | 0,0004 | 42,4 | 8,87E-06 |
| SMPDL3B    | 7,0  | 0,0004 | 40,6 | 7,33E-07 |
| SNCA       | 9,2  | 0,0031 | 41,5 | 4,80E-05 |
| SNCAIP     | 3,1  | 0,001  | 4,4  | 8,67E-05 |
| SNX24      | 2,8  | 0,0024 | 4,1  | 0,0002   |
| SOX11      | 7,0  | 0,0015 | 4,7  | 0,0071   |
| SPINT1     | 3,0  | 0,0097 | 4,0  | 0,0022   |
| SPRR2C     | 5,9  | 0,0036 | 4,4  | 0,0109   |
| SPRR2E     | 18,5 | 0,0011 | 13,4 | 0,0027   |
| SPRR2F     | 23,7 | 0,0003 | 42,3 | 5,89E-05 |
| SPTBN2     | 4,7  | 0,0016 | 5,5  | 0,0008   |
| SSC4D      | 3,4  | 0,0105 | 3,5  | 0,0092   |
| SSTR4      | 2,9  | 0,0214 | 4,3  | 0,0036   |
| SSX2IP     | 4,3  | 0,007  | 5,4  | 0,0029   |
| ST6GAL1    | 5,8  | 0,0009 | 9,0  | 0,0001   |
| STAP2      | 4,7  | 0,0008 | 6,6  | 0,0002   |
| STIM2      | 2,4  | 0,0063 | 3,8  | 0,0002   |
| STK17A     | 2,3  | 0,0003 | 2,8  | 4,77E-05 |
| STK26      | 4,0  | 0,0012 | 5,9  | 0,0002   |
| STK32B     | 9,8  | 0,0005 | 17,4 | 7,24E-05 |
| STK33      | 8,4  | 0,003  | 12,5 | 0,0009   |
| STON2      | 4,8  | 0,0035 | 7,7  | 0,0005   |
| STRBP      | 2,6  | 0,0182 | 2,3  | 0,0324   |
| STX11      | 3,6  | 0,0068 | 4,7  | 0,002    |
| STX1B      | 2,6  | 0,0328 | 3,5  | 0,0082   |
| STXBP2     | 8,1  | 0,0011 | 16,6 | 9,64E-05 |
| SULF1      | 2,7  | 0,0031 | 5,4  | 5,06E-05 |
| SULT1A3    | 2,1  | 0,018  | 3,3  | 0,001    |
| SULT1A4    | 2,1  | 0,018  | 3,3  | 0,001    |
| SYN1       | 3,4  | 0,0378 | 3,2  | 0,0457   |
| SYT17      | 3,7  | 0,0485 | 7,4  | 0,0054   |
| SYT4       | 7,1  | 0,0016 | 23,9 | 2,75E-05 |
| TACC2      | 5,5  | 0,0117 | 5,7  | 0,01     |
| TBC1D15    | 4,1  | 0,0205 | 12,9 | 0,0004   |
| TBX20      | 4,1  | 0,0225 | 7,5  | 0,0028   |
| TCAIM      | 2,3  | 0,0031 | 2,3  | 0,0028   |
| TCEAL2     | 10,2 | 0,0073 | 34,2 | 0,0004   |
| TCEAL6     | 8,0  | 0,0068 | 9,1  | 0,0045   |
| TDRD10     | 2,0  | 0,0196 | 2,2  | 0,0116   |
| TEK        | 3,7  | 0,0031 | 7,0  | 0,0001   |
| TENM1      | 8,1  | 0,0031 | 15,9 | 0,0004   |
| TFAP2C     | 5,8  | 0,0332 | 31,0 | 0,0005   |
| TGM1       | 10,0 | 0,0061 | 29,9 | 0,0004   |
| TGM2       | 3,7  | 0,0029 | 9,5  | 3,66E-05 |
| THBD       | 4,9  | 0,0076 | 7,6  | 0,0015   |
| THSD7B     | 4,6  | 0,0031 | 7,5  | 0,0004   |

|           |      |          |      |          |
|-----------|------|----------|------|----------|
| TLL1      | 4,4  | 0,0277   | 11,2 | 0,0016   |
| TM4SF1    | 5,6  | 0,0048   | 10,9 | 0,0004   |
| TM7SF2    | 5,1  | 0,0005   | 5,1  | 0,0006   |
| TMC1      | 2,3  | 0,03     | 2,9  | 0,0078   |
| TMC5      | 9,6  | 0,0029   | 16,9 | 0,0005   |
| TMEM102   | 2,7  | 0,0465   | 5,7  | 0,0021   |
| TMEM108   | 5,6  | 0,0038   | 5,4  | 0,0044   |
| TMEM132A  | 2,3  | 0,039    | 3,7  | 0,0038   |
| TMEM154   | 4,4  | 2,17E-07 | 5,1  | 7,85E-08 |
| TMEM160   | 3,0  | 6,86E-05 | 2,4  | 0,0006   |
| TMEM191C  | 2,8  | 0,0311   | 3,6  | 0,0096   |
| TMEM233   | 6,4  | 0,0043   | 10,1 | 0,0009   |
| TMEM255A  | 3,6  | 0,0001   | 9,1  | 4,29E-07 |
| TMEM30B   | 3,1  | 0,0031   | 4,8  | 0,0003   |
| TMEM35A   | 6,1  | 0,0059   | 5,5  | 0,0084   |
| TMOD1     | 4,3  | 0,0001   | 5,9  | 1,78E-05 |
| TMPRSS3   | 12,8 | 0,0006   | 26,1 | 7,87E-05 |
| TMTC1     | 2,5  | 0,0095   | 2,9  | 0,0033   |
| TNFRSF11B | 6,7  | 0,0084   | 5,1  | 0,0192   |
| TNFRSF21  | 3,2  | 8,45E-06 | 3,4  | 4,85E-06 |
| TNFRSF8   | 5,1  | 0,0167   | 8,5  | 0,0033   |
| TNNT1     | 8,4  | 0,0042   | 42,2 | 4,67E-05 |
| TNNT2     | 8,3  | 0,0008   | 10,6 | 0,0003   |
| TOM1L1    | 9,0  | 0,0072   | 38,3 | 0,0002   |
| TPD52     | 6,5  | 0,0009   | 8,8  | 0,0003   |
| TPD52L1   | 2,5  | 0,0139   | 3,2  | 0,0027   |
| TPM1      | 2,4  | 8,62E-05 | 2,2  | 0,0002   |
| TPMT      | 2,1  | 0,0022   | 2,3  | 0,0008   |
| TPPP3     | 2,5  | 0,0089   | 3,4  | 0,0012   |
| TRAF5     | 2,3  | 0,0017   | 2,5  | 0,0007   |
| TRDN      | 4,5  | 0,0085   | 16,0 | 8,62E-05 |
| TRIM14    | 5,9  | 0,0039   | 15,9 | 0,0001   |
| TRIM16    | 3,6  | 7,44E-05 | 3,8  | 5,50E-05 |
| TRIM29    | 6,1  | 0,0016   | 7,4  | 0,0008   |
| TRIM58    | 3,6  | 0,0138   | 4,4  | 0,0055   |
| TRMT2B    | 2,7  | 0,0179   | 2,4  | 0,0282   |
| TRNP1     | 4,3  | 0,0078   | 3,9  | 0,0113   |
| TSPAN18   | 4,0  | 0,0039   | 7,5  | 0,0002   |
| TSPAN2    | 9,9  | 0,0027   | 13,4 | 0,0011   |
| TSPAN33   | 6,9  | 0,0027   | 15,1 | 0,0002   |
| TSPOAP1   | 9,2  | 0,0003   | 5,6  | 0,002    |
| TST       | 4,9  | 0,0062   | 3,9  | 0,0145   |
| TSTD1     | 6,3  | 0,0343   | 13,0 | 0,006    |
| TTC9      | 8,0  | 4,95E-05 | 5,9  | 0,0002   |
| TUBB4A    | 4,1  | 0,0061   | 7,3  | 0,0006   |
| UBXN11    | 2,8  | 0,017    | 3,8  | 0,0033   |
| UBXN2B    | 4,9  | 0,0009   | 6,6  | 0,0002   |
| UPK1B     | 9,4  | 0,0002   | 35,6 | 2,08E-06 |
| UPK3B     | 10,6 | 0,0072   | 25,6 | 0,0008   |
| USP43     | 5,7  | 0,0004   | 5,9  | 0,0003   |
| USP54     | 2,7  | 0,0031   | 4,5  | 0,0001   |
| VAMP8     | 5,5  | 0,0003   | 8,5  | 3,37E-05 |

|         |      |          |      |          |
|---------|------|----------|------|----------|
| VAT1L   | 8,1  | 0,002    | 11,7 | 0,0006   |
| VNN1    | 2,4  | 0,0141   | 2,4  | 0,0141   |
| VPS18   | 2,5  | 0,0044   | 2,3  | 0,0071   |
| VSIG2   | 10,0 | 2,65E-05 | 25,6 | 8,14E-07 |
| VSIR    | 2,8  | 0,0002   | 2,9  | 0,0002   |
| VTN     | 8,1  | 0,0024   | 16,2 | 0,0003   |
| VWA2    | 7,6  | 0,0014   | 11,9 | 0,0003   |
| VWA5B1  | 5,3  | 0,0277   | 5,6  | 0,0233   |
| VWA7    | 5,4  | 0,001    | 11,1 | 4,92E-05 |
| WDFY4   | 3,4  | 0,0117   | 6,5  | 0,0006   |
| WDR54   | 3,2  | 0,0008   | 2,3  | 0,0083   |
| WFDC2   | 6,6  | 0,0043   | 14,2 | 0,0004   |
| WFDC3   | 2,8  | 0,0474   | 2,8  | 0,0472   |
| WNK4    | 2,7  | 0,0414   | 6,0  | 0,0015   |
| WNT10A  | 10,8 | 9,20E-07 | 16,9 | 1,45E-07 |
| WNT10B  | 10,6 | 0,0095   | 16,6 | 0,0032   |
| WNT2B   | 14,4 | 7,13E-06 | 22,5 | 1,46E-06 |
| WSCD2   | 3,8  | 0,0449   | 7,3  | 0,0063   |
| WWC1    | 10,0 | 0,0036   | 9,4  | 0,0043   |
| YWHAH   | 2,4  | 0,0001   | 2,3  | 0,0002   |
| ZBTB7C  | 3,2  | 0,0006   | 5,6  | 1,66E-05 |
| ZCCHC12 | 7,9  | 0,0254   | 15,4 | 0,0056   |
| ZFP42   | 4,3  | 0,0015   | 4,4  | 0,0013   |
| ZNF14   | 2,3  | 0,0145   | 2,6  | 0,0063   |
| ZNF154  | 2,4  | 0,0259   | 3,5  | 0,0038   |
| ZNF185  | 4,0  | 0,0087   | 6,9  | 0,001    |
| ZNF229  | 2,4  | 0,0495   | 6,8  | 0,0004   |
| ZNF382  | 2,8  | 0,0376   | 3,5  | 0,0147   |
| ZNF416  | 2,1  | 0,0367   | 3,3  | 0,003    |
| ZNF420  | 2,5  | 0,0143   | 2,0  | 0,0487   |
| ZNF461  | 2,2  | 0,0034   | 2,3  | 0,0029   |
| ZNF473  | 2,4  | 0,0022   | 2,4  | 0,0028   |
| ZNF502  | 2,2  | 0,0052   | 2,0  | 0,0098   |
| ZNF551  | 2,2  | 0,0025   | 2,0  | 0,0067   |
| ZNF567  | 2,2  | 0,0056   | 2,0  | 0,0102   |
| ZNF582  | 2,1  | 0,028    | 2,1  | 0,0255   |
| ZNF668  | 3,8  | 0,0072   | 7,6  | 0,0004   |
| ZNF814  | 4,6  | 0,0032   | 3,7  | 0,0079   |
| ZNF845  | 2,1  | 0,0045   | 2,2  | 0,0032   |

**up in -/CD271+  
fromVS**

| Gene name | FC vs -/- | raw P value | FC vs MSCA1+ | raw P value |
|-----------|-----------|-------------|--------------|-------------|
| ADCY2     | 6,2       | 1,20E-05    | 2,4          | 0,0068      |
| BCAN      | 4,1       | 0,0023      | 3,8          | 0,0063      |
| CD74      | 2,5       | 0,001       | 2,1          | 0,0011      |
| GPAT3     | 2,3       | 0,0266      | 2,4          | 0,0371      |
| HPSE2     | 7,8       | 0,004       | 4,6          | 0,0204      |
| JAM2      | 2,1       | 0,0301      | 2,1          | 0,0371      |
| MS4A4A    | 2,7       | 0,0001      | 2,7          | 0,0008      |
| MYOC      | 8,3       | 0,0001      | 3,3          | 0,0282      |
| OMD       | 2,2       | 0,0166      | 2,2          | 0,0084      |

|        |     |        |     |        |
|--------|-----|--------|-----|--------|
| OR1S1  | 2,2 | 0,0012 | 2,2 | 0,0086 |
| PCDH19 | 4,5 | 0,0048 | 3,3 | 0,0346 |
| RELN   | 3,5 | 0,0027 | 2,5 | 0,0357 |
| RNASE6 | 2,8 | 0,0189 | 4,3 | 0,0019 |
| THBS4  | 4,8 | 0,0028 | 3,1 | 0,0446 |

#### up in MSCA1+ from VS

| Gene name    | FC vs -/CD271+ | raw P value | FC vs -/- | raw P value |
|--------------|----------------|-------------|-----------|-------------|
| ABCA4        | 3,5            | 0,0163      | 3,1       | 0,0251      |
| ACR          | 2,4            | 0,0313      | 3,7       | 0,0025      |
| ADAM12       | 4,2            | 0,0014      | 38,5      | 1,44E-07    |
| ALPL         | 16,8           | 9,50E-05    | 67,8      | 1,09E-07    |
| APOE         | 2,5            | 0,006       | 17,5      | 1,55E-05    |
| BIRC5        | 3,3            | 0,0154      | 2,8       | 0,0124      |
| CCDC3        | 2,2            | 0,0032      | 13,6      | 6,11E-07    |
| CDKL4        | 2,1            | 0,0129      | 9,6       | 3,84E-05    |
| CEMIP        | 9,6            | 0,0026      | 23,1      | 4,96E-05    |
| CGREF1       | 3,5            | 0,0048      | 3,1       | 0,0135      |
| CIDEA        | 4,0            | 0,0388      | 9,8       | 0,002       |
| CILP2        | 2,6            | 0,0452      | 19,6      | 1,65E-06    |
| CNN2         | 3,1            | 0,0066      | 5,9       | 0,0008      |
| CNTNAP2      | 19,8           | 0,0111      | 27,9      | 0,0013      |
| COL3A1       | 2,5            | 0,0314      | 3,3       | 0,0025      |
| COLEC11      | 2,3            | 0,0373      | 11,2      | 1,12E-05    |
| CPZ          | 2,6            | 0,007       | 4,7       | 0,0007      |
| EDNRA        | 2,2            | 0,0301      | 3,9       | 0,0052      |
| ENPP1        | 2,3            | 0,0066      | 5,8       | 1,69E-05    |
| FAM169A      | 2,0            | 0,019       | 2,4       | 0,0201      |
| FAM45BP      | 2,2            | 0,0367      | 2,4       | 0,0093      |
| FAM47B       | 2,9            | 0,0095      | 2,9       | 0,0013      |
| FHL2         | 2,7            | 0,0025      | 4,7       | 0,0002      |
| GREM1        | 2,7            | 0,0381      | 50,8      | 5,46E-06    |
| IFNA13       | 2,1            | 0,0244      | 3,6       | 0,0007      |
| KCNIP2       | 3,3            | 0,0071      | 3,8       | 0,0034      |
| KRTAP1-1     | 2,0            | 0,0391      | 2,1       | 0,0141      |
| LINC00632    | 4,6            | 0,0026      | 2,4       | 0,0171      |
| LINC00908    | 2,2            | 0,0254      | 2,2       | 0,0374      |
| LINC01179    | 3,5            | 0,0328      | 6,2       | 0,0006      |
| LINC01363    | 3,6            | 0,0013      | 3,4       | 0,001       |
| LINC02021    | 2,0            | 0,0154      | 2,0       | 0,0336      |
| LOC101928861 | 5,2            | 0,001       | 3,8       | 0,01        |
| LOC283299    | 5,6            | 0,02        | 4,1       | 0,0224      |
| LOC729683    | 3,5            | 0,0047      | 3,0       | 0,0023      |
| LPL          | 3,5            | 0,0161      | 7,9       | 9,36E-05    |
| MEST         | 2,1            | 0,0289      | 3,5       | 0,0006      |
| MGC15885     | 3,2            | 0,02        | 7,1       | 8,29E-05    |
| MMP21        | 2,6            | 0,042       | 7,8       | 0,0004      |
| MOBP         | 3,5            | 0,0074      | 3,0       | 0,0123      |
| MRGPRX1      | 2,7            | 0,0002      | 2,3       | 0,0003      |
| MYOM1        | 2,5            | 0,0469      | 2,8       | 0,04        |
| NANOS3       | 3,1            | 0,0412      | 3,3       | 0,0114      |
| NFAM1        | 2,9            | 0,0467      | 3,7       | 0,0054      |



|           |     |        |      |          |
|-----------|-----|--------|------|----------|
| NPR3      | 3,4 | 0,0492 | 45,8 | 4,59E-05 |
| OR4C6     | 2,7 | 0,0362 | 2,2  | 0,0462   |
| OR4F15    | 2,6 | 0,0149 | 2,1  | 0,0236   |
| OR4F5     | 4,2 | 0,023  | 3,3  | 0,0432   |
| OR4M1     | 3,5 | 0,0189 | 3,4  | 0,0093   |
| OR4P4     | 5,5 | 0,0081 | 5,1  | 0,0034   |
| OR56A5    | 5,5 | 0,0062 | 3,1  | 0,0215   |
| OR5J2     | 7,4 | 0,0037 | 4,0  | 0,0095   |
| OR6C75    | 2,3 | 0,0399 | 2,3  | 0,0154   |
| PDIA3P1   | 7,5 | 0,0367 | 6,1  | 0,0487   |
| RAC3      | 2,7 | 0,0031 | 7,6  | 2,88E-05 |
| REXO1L2P  | 2,5 | 0,0478 | 2,3  | 0,0154   |
| RHD       | 2,2 | 0,0305 | 2,7  | 0,0044   |
| SCUBE3    | 2,4 | 0,0448 | 2,5  | 0,0148   |
| SDC1      | 3,4 | 0,003  | 5,0  | 0,0007   |
| SGMS1-AS1 | 4,7 | 0,0098 | 3,7  | 0,0405   |
| SLC38A4   | 2,8 | 0,0183 | 13,3 | 0,0002   |
| SPATA31C1 | 3,6 | 0,0341 | 3,1  | 0,0222   |
| SPIB      | 3,0 | 0,0241 | 2,3  | 0,0457   |
| SSTR5-AS1 | 2,7 | 0,0176 | 2,3  | 0,0476   |
| TLE6      | 4,5 | 0,0446 | 4,3  | 0,0329   |
| TMEM178A  | 4,6 | 0,0416 | 6,1  | 0,0095   |
| TPX2      | 4,5 | 0,015  | 3,6  | 0,0241   |
| WFS1      | 2,0 | 0,0464 | 3,3  | 0,0011   |
| ZNF733P   | 2,7 | 0,0071 | 2,4  | 0,005    |
